# Supplementary material for: Evaluating the costs of cholera illness and cost-effectiveness of a single dose oral vaccination campaign in Lusaka, Zambia
Source: PLoS One. 2019 May 31;14(5):e0215972. doi: 10.1371/journal.pone.0215972 (PMC6544210; doi:10.1371/journal.pone.0215972)
Supplement: S1 Appendix — (XLSX) [file pone.0215972.s001.xlsx]

## Sheet: Household cholera survey-clean2
A1	A3	A4	A5	B1	B2	B3	B4	B5	B6	C1	C2a	C2b	C3	C4	C5	C6	C7	C8	C9	C10	C11	C12	C13	C14	C15	C16	C17	C18	C19	C20	C21	C22	C22a	C23	C23a	C23b	C24	C25	C26	C27	C28	C29	D1	D2	D3	D4	D5	D6	D7
100-121	1	1	2	2	25	5	3	1	1	4	1	5	4	1	2	2	6	2	6	2	6	2		1	1	2		2			other	60	10	other	60	10	1	1	6	6	0	6	7	0	7	0	3	3
100-131	1	1	2	1	60	3	3	1	3	4	1	5	4	1	1	2	6	2	6	2	6	2		1	1	2		2			5	5	10	5	10	10	1	0	1	6	0	6	7	3	4	0	5	3
100-136	1	1	2	1	52	1	3	1	4	2	1	10	4	2		2		2		2	6	2		2		2		2			other	0	15	other	97	15	1	0	6	6	0	6	9	5	3	0	other	1	2
100-161	1	1	2	1	11	2	1	1	1	1	1		4	1	97	2	6	3	97	2	6	2		1	1	2		2			other	60	20	5	20	60	3	0	6	6	0	6	4	0	4	0	6	3
100-171	1	1	2	2	19	2	1	1	3	2	1	0	4	1	1	2	6	2	6	2	6	2		1	2	2		2			other	150	45	other	97	45	0					6	4	4	1	0	2	1	1
100-181	1	2	2	2	24	2	2	1	4	1	1	10	4	1	1	2	6	2	6	2	6	2		2		2		2			1	0	12	1	97	12	1	0	6	6	0	6	4	0	3	0	2	1	1
100-221	1	1	2	2	57	1	1	1	5	1	1	2	4	2		2		2		2	6	2		1	1	2		2			6	20	97	6	20	97	2	0	1	97	0	6	3	2	1	0	2	3
100-231	1	1	2	2	35	1	3	1	3	3	1	20	2	1	1	2	6	2	6	2	6	2		2		2		2			6	100	20	other	97	10	1	0	6	1	97	6	5	4	1	0	2	3
100-236	1	1	2	1	9	other	1	1	1	2	1	3	3	1	1	2	6	2	1	4	1	2		1	1	2		2			6	20	10	1	20	15	2	0	1	1	0	6	2	2	1	0	2	3
100-246	1	2	2	2	56	1	other	1	5	1	1	5	4	1	1	2	6	2	6	2	6	2		1	1	2		2			6	30	97	5	35	10	1	0	1	1	0	6	3	3	0	0	2	3
100-276	1	1	2	1	32	1	1	1	3	1	1	12	2	1	1	2	6	2	6	2	6	2		1	1	2		2			6	50	10	6	50	5	1	0	1	97	0	6	4	4	1	0	2	3
100-291	1	1	2	2	28	1	3	1	3	2	1	20	2	1	1	2	6	2	6	2	6	2		2		2		2			6	50	10	6	35	8	2	0	1	6	0	6	7	7	3	0	1	1	1
100-361	1	1	2	2	30	other	1	1	3	2	1	1	2	1	1	2	6	2	6	2	6	2		2		2		2			1	0	20	1	97	20	1	0	6	6	0	6	4	5	7	14	2	1	2
100-476	1	1	2	2	23	other	3	1	3	3	1	70	2	1	3	2	6	2	6	2	6	2		1	2	2		2			other	75	30	other	97	30	2	0	2	1	0	6	9	5	2	0	2	3
200-106	3	1	2	2	34	1	3	1	3	0	1	3	4	2		2		2		2	6	2		2		2		1	Bananas	milk and talk time	1	1	0	20	1	97	20	0					6	3	3	0	0	5	3
200-107	3	1	2	2	29	other	1	1	3	1	1	30	2	1	2	1	1	2	6	2	6	2		2		2		1	Food	Labs and Talk Time	2	other	60	20	other	60	20	3	0	6	6	0	6	1	14	7	7	2	1
200-148	3	1	2	1	25	5	2	1	1	1	1	5	2	1	1	2	6	2	6	2	6	2		2		2		2			other	50	25	other	50	20	3	0	6	6	0	6	3	7	3	5	2	1	1
200-151	3	1	2	2	26	6	1	1	3	0	1	4	2	2		2		2		2	6	2		2		2		1	Food and Talk Time	1	1	0	20	1	97	20	0					6	2	5	3	3	2	1	1
200-152	3	1	2	2	36	1	2	1	3	3	1	20	4	1	1	2	6	2	6	2	6	2		2		2		2			1	0	10	1	97	10	0					6	3	1	4	0	5	3
200-156	3	2	2	2	33	other	3	1	3	1	1	0	4	2		2		2		2	6	2		2		2		2			1	0	20	1	97	20	1	0	6	6	0	6	3	4	2	0	2	1	2
200-161	3	2	2	1	47	1	3	1	3	5	1	0	4	2		2		2		2	6	2		1	1	2		1	Milk	1	other	25	10	other	25	10	0					6	7	7	5	5	8	1	2
200-166	3	2	2	1	27	1	2	1	1	1	1	3	2	1	1	2	6	2	6	2	6	2		2		2		2			other	35	20	5	97	20	2	0	6	6	0	6	2	4	2	3	2	1	1
200-226	3	1	2	2	22	other	3	1	1	2	1	0	4	1	1	2	6	2	6	3	6	2		2		2		2			1	0	30	5	97	15	3	0	97	1	0	6	4	2	2	0	2	3
200-231	3	1	2	2	39	2	1	1	3	1	1	50	4	1	1	2	6	2	6	2	6	2		1	1	2		2			6	20	10	6	40	10	2	0	1	1	0	6	7	0	0	0	6	3
200-481	3	1	2	1	4	2	1	1	3	1	1	0	4	1	1	2	6	2	6	2	6	2		2		2		2			1	0	15	1	97	15	1	0	6	1	0	6	3	0	3	0	5	3
200-486	3	1	2	2	17	4	3	1	1	4	1	15	4	1	1	2	6	2	6	2	6	2		1	1	2		2			other	60	15	1	60	30	3	0	6	1	0	6	5	0	5	0	6	3
200-521	3	1	2	2	38	1	1	1	3	2	1	20	4	2		2		2		2	6	2		2		2		2			5	10	10	5	10	10	1	0	6	6	0	6	4	4	4	0	5	3
200-567	3	1	2	2	55	1	2	1	3	2	1	10	4	2		2		2		2	6	2		2		2		2			1	0	10	1	97	10	1	0	6	6	0	6	3	0	3	0	5	3
300-116	2	other	2	2	48	1	2	1	4	1	1	20	4	2		2		2		2	6	2		2		2		2			1	0	15	1	97	15	0					6	3	3	1	0	2	3
300-121	2	1	2	2	23	1	3	1	1	1	1	10	4	2		2		2		2	6	2		2		2		2			1	0	10	1	97	10	1	0	6	6	0	6	2	2	0	0	6	3
300-136	2	1	2	1	31	4	3	1	3	1	1	10	4	2		2		2		2	6	2		1	1	2		2			other	25	10	other	25	10	1	0	6	6	0	6	4	3	0	0	2	3
300-141	2	1	1	2	26	1	2	1	1	1	1	0	4	2		2		2		2	6	2		1	2	2		2			other	300	97	other	97	110	1	0	6	6	0	6	3	3	0	0	other	3
300-251	2	2	2	2	30	1	1	1	3	1	1	5	2	1	1	2	6	2	6	2	6	2		1	1	2		2			other	45	20	5	20	15	2	0	6	1	0	6	4	3	1	0	2	3
300-281	2	1	2	2	18	1	3	1	1	1	1	5	2	2		1	1			2	6	2		1	1	2		2			5	5	10	5	10	5	1	0	6	1	0	6	3	3	1	0	5	3
300-346	2	1	2	1	3	4	other	1	1	4	1	25	4	2		2		2		2	6	2		2		2		2			1	0	60	1	97	60	2	0	6	6	0	6	6	99	6	0	6	3
300-351	2	1	2	2	11	2	1	1	1	2	1	30	4	2		2		2		2	6	2		1	1	2		1	Paid for a book	1	other	40	20	other	20	20	2	0	6	6	0	6	5	0	5	99	6	3
300-366	2	other	2	2	30	1	3	1	3	2	1	10	4	1	1	2	6	2	6	2	6	2		1	1	2		2			6	0	97	6	97	16	2	0	6	1	0	6	4	0	4	99	8	3
300-371	2	1	2	2	7	2	1	1	1	2	1	20	4	1	1	2	6	2	6	2	6	2		2		2		2			other	90	30	other	97	30	1	0	2	6	0	6	4	1	3	3	6	3
300-381	2	1	1	2	40	1	2	1	3	2	1	10	2	1	1	2	6	2	6	2	6	2		1	3	2		2			other	418	60	other	97	60	3	0	6	2	0	6	5	4	1	99	2	1	1
300-392	2	1	2	2	2	2	other	1	other	2	1	5	4	2		2		2		2	6	2		1	1	2		2			5	12	15	5	14	15	2	0	6	6	0	6	4	4	99	99	other	3
300-481	2	1	2	2	53	other	2	1	3	2	1	1	2	1	1	2	6	2	6	2	6	2		2		2		2			other	40	10	1	97	15	2	0	6	6	0	6	3	3	0	0	5	3
300-486	2	1	2	2	32	2	2	1	3	0	1	5	2	1	1	2	6	2	6	2	6	2		1	1	2		1	Talk Time	1	other	30	15	6	97	15	2	0	6	1	0	6	3	4	0	1	2	1	1
300-496	2	2	2	1	27	5	3	1	3	0	1	5	2	1	1	2	6	2	6	2	6	2		2		2		2			1	0	15	1	97	15	2	0	6	6	0	6	2	3	0	0	8	1	1
300-506	2	2	2	2	42	3	2	1	3	1	1	2	2	1	1	2	6	2	6	2	6	2		1	1	2		2			5	10	20	5	97	15	2	0	6	6	0	6	3	3	1	0	2	1	1
300-511	2	1	2	2	32	1	2	1	3	1	1	2	2	1	1	2	6	2	6	2	6	2		1	6	2		2			other	50	20	other	97	20	2	0	6	6	0	6	3	0	0	1	4	1	1
300-516	2	1	1	2	41	2	2	1	3	1	1	1	2	1	1	2	6	2	6	2	6	2		2		2		2			other	0	40	6	97	40	2	2	1	1	0	6	2	4	0	0	other	1	2
300-531	2	1	2	1	34	1	2	1	3	0	1	3	2	2		2		2		2	6	2		1	1	2		1	Food	1	other	25	10	1	97	20	1	0	6	6	0	6	2	2	0	0	2	1	1
100-101	1	1	2	2	44	4	2	1	5	1	2	0				2		2		2	6	2		2		2		2			1	0	10	1	97	10	1	0	6	1	0	6	1	3	3	5	5	3
100-102	3	1	2	2	40	other	3	1	3	0	2	0				2		2		2	6	2		2		2		1	Food	1	1	0	25	1	97	25	2	0	6	1	0	6	4	4	0	0	2	3
100-106	1	1	2	2	18	other	2	1	1	2	2	0				2		2		2	6	2		1	2	2		2			1	0	10	1	97	10	4	0	6	6	97	6	1	97	97	97	6	3
100-111	1	1	2	1	40	1	1	1	3	1	2	0				2		2		2	6	2		1	1	2		2			5	55	15	5	55	15	2	0	1	2	0	6	9	3	6	0	2	1	6
100-116	1	1	2	2	26	other	2	1	3	1	2	0				2		2		2	6	2		2		2		2			6	30	10	6	30	10	1	0	1	97	0	6	1	0	0	0	5	3
100-126	1	1	2	2	43	1	1	1	3	2	2	20				2		2		2	6	2		1	1	2		2			5	10	10	5	10	10	1	0	1	1	0	6	4	2	2	0	2	1	1
100-141	1	1	2	1	36	other	2	1	3	0	2	0				2		2		2	6	2		1	2	2		2			other	150	10	6	97	10	2	0	6	1	0	6	2	2	2	0	4	1	6
100-146	1	1	2	2	42	1	1	1	1	0	2	0				2		2		2	6	2		1	1	2		2			other	100	15	5	10	30	1	0	1	97	0	6	3	14	10	0	8	1	1
100-156	1	1	2	2	22	2	2	1	3	1	2	0				2		2		2	6	2		2		2		2			1	0	20	5	10	10	1	0	6	6	0	6	3	0	3	0	5	3
100-162	1	1	2	1	26	2	4	1	1	1	2	0				2		2		2	6	2		2		2		2			6	200	15	6	97	15	2	0	1	1	0	6	3	2	2	0	4	3
100-166	1	1	2	2	50	other	1	1	5	1	2	0				2		2		2	6	2		2		2		2			1	0	25	1	97	25	1	0	6	6	0	6	2	2	2	0	8	1	97
100-176	1	1	2	1	29	5	2	1	4	1	2	0				2		2		2	6	2		1	1	2		2			5	15	10	5	15	10	1	0	6	1	0	6	3	1	2	0	2	1	1
100-186	1	1	2	1	26	other	2	1	3	1	2	0				2		2		2	6	2		1	1	2		2			other	50	15	other	20	15	2	0	6	6	0	6	5	0	5	0	1	1	97
100-211	1	1	2	2	4	other	other	1	1	1	2	0				2		2		2	6	2		2		2		2			1	0	10	1	97	10	1	0	6	1	0	6	4	4	2	0	5	3
100-216	1	1	2	2	8	other	1	1	1	1	2	0				2		2		2	6	2		2		2		2			5	20	60	5	20	60	1	0	1	1	0	6	4	4	0	0	2	3
100-226	1	1	2	1	25	other	3	1	1	1	2	0				2		2		2	6	2		2		2		2			1	0	20	6	20	8	1	0	1	1	0	6	6	6	3	0	5	3
100-241	1	1	2	1	12	other	1	1	1	1	2	0				2		2		2	6	2		1	1	2		2			6	60	20	6	60	20	2	0	1	6	0	6	1	4	2	0	5	3
100-251	1	1	2	2	40	1	1	1	4	1	2	0				2		2		2	6	2		2		2		2			1	0	20	1	97	20	2	0	6	6	0	6	1	8	4	0	4	3
100-256	1	1	2	2	70	1	1	1	5	1	2	0				2		2		2	6	2		1	1	2		2			6	30	10	1	30	20	1	0	1	1	0	6	4	0	0	0	5	3
100-261	1	1	2	1	32	other	3	1	3	2	2	0				2		2		2	6	2		1	1	2		2			6	25	10	6	25	10	1	0	6	1	0	6	7	7	4	0	1	1	97
100-266	1	1	2	1	38	1	1	1	3	1	2	0				2		2		2	6	2		1	1	2		2			6	80	10	6	20	4	1	0	1	1	0	6	5	5	0	0	1	1	1
100-271	1	1	2	2	12	4	1	1	1	1	2	0				2		2		2	6	2		1	1	2		2			6	50	10	6	45	5	2	0	1	6	0	6	8	8	3	0	5	3
100-281	1	1	2	1	37	1	3	1	3	1	2	0				2		2		2	6	2		2		2		2			6	0	30	1	97	30	1	0	6	1	0	6	4	3	1	0	4	1	1
100-286	1	1	2	1	23	1	4	1	1	1	2	0				2		2		2	6	2		2		2		2			1	0	25	6	30	10	1	0	1	1	0	6	5	5	2	0	2	3
100-296	1	2	2	2	10	other	1	1	1	1	2	0				2		2		2	6	2		1	1	2		2			6	20	15	6	60	15	1	0	1	1	0	6	3	3	0	0	2	3
100-301	1	1	2	2	22	1	3	1	1	1	2	0				2		2		2	6	2		1	1	2		2			6	20	10	1	20	15	1	0	1	1	0	6	6	6	2	0	5	3
100-341	1	1	2	1	64	other	1	1	1	0	2	0				2		2		2	6	2		1	1	2		2			other	20	10	other	97	10	5	0	1	1	0	6	5	7	5	5	1	1	1
100-346	1	1	2	2	44	other	1	1	3	0	2	0				2		2		2	6	2		2		2		1	Food and Talk Time	1	1	0	10	1	97	10	2	0	6	6	0	6	2	5	7	5	2	1	1
100-351	1	1	2	2	27	2	3	1	3	0	2	0				2		2		2	6	2		2		2		1	Food	1	1	0	30	1	10	30	1	0	6	6	0	6	1	1	1	1	5	3
100-356	1	1	2	2	52	2	1	1	5	1	2	0				2		2		2	6	2		2		2		2			other	20	10	other	20	10	2	0	1	6	0	6	7	7	0	0	5	3
100-366	1	1	2	2	31	1	2	1	1	0	2	0				2		2		2	6	2		2		2		1	Talk Time	1	1	0	20	1	97	20	0					6	1	1	0	3	4	1	1
100-371	1	1	2	2	24	2	3	1	1	2	2	0				2		2		2	6	2		2		2		1	Food	1	1	0	13	1	97	13	1	0	6	6	0	6	4	4	0	4	1	1	4
100-376	1	1	2	2	41	other	1	1	3	2	2	0				2		2		2	6	2		1	1	2		1	Talk Time	1	other	20	15	other	97	20	3	0	6	6	0	6	1	5	7	7	2	1	1
100-381	1	1	2	2	55	1	1	1	3	0	2	0				2		2		2	6	2		1	1	2		1	Talk Time and Food	2	other	15	10	other	15	10	1	0	6	6	97	6	1	7	4	14	7	3
100-386	1	1	2	2	28	5	2	1	1	1	2	0				2		2		2	6	2		2		2		2			1	0	20	1	97	20	1	0	6	6	0	6	2	4	2	5	2	1	2
100-391	1	1	2	1	21	6	1	1	5	0	2	0				2		2		2	6	2		2		2		2			other	25	10	other	15	10	1	0	6	6	0	6	3	5	2	5	4	1	1
100-396	1	1	2	2	38	1	1	1	3	2	2	0				2		2		2	6	2		1	1	2		1	Talk Time	1	other	100	45	1	97	10	2	0	6	6	0	97	4	14	3	4	5	3
100-481	1	1	2	2	26	1	3	1	3	0	2	0				2		2		2	6	2		1	2	2		1	Talk time	1	other	120	30	other	97	30	1	0	2	1	0	6	2	2	2	0	2	3
100-486	1	1	2	1	49	other	3	1	3	3	2	0				2		2		2	6	2		1	1	2		2			other	50	20	other	50	20	1	0	6	1	0	6	3	3	0	3	3	1	1
100-491	1	1	2	2	32	2	other	1	4	0	2	0				2		2		2	6	2		1	1	2		2			5	15	20	5	15	60	1	0	1	6	0	6	3	3	5	0	5	1	1
100-501	1	1	2	1	21	1	4	1	1	2	2	0				2		2		2	6	2		2		2		2			1	0	20	1	97	20	1	0	6	1	0	6	0	2	0	0	1	1	1
100-506	1	1	2	1	57	1	1	1	2	1	2	0				2		2		2	6	1	1	1	1	2		1	Talk Time and Food	2	other	30	30	6	97	30	1	0	1	2	0	6	4	6	3	14	8	1	1
100-511	1	1	2	1	23	1	3	1	1	0	2	0				2		2		2	6	2		1	1	2		1	Food and talk time	1	other	30	15	other	30	15	1	0	6	1	0	6	2	2	0	0	1	1	1
100-516	1	2	2	2	33	1	3	1	3	1	2	0				2		2		2	6	2		2		2		1	Food	1	1	0	15	1	97	15	1	0	6	1	0	6	1	4	0	0	2	3
100-526	1	1	2	2	47	other	3	1	3	0	2	0				2		2		2	6	2		1	1	2		2			other	30	15	other	30	15	1	0	6	1	0	6	7	3	0	0	2	3
100-526	1	1	2	2	47	other	3	1	3	0	2	0				2		2		2	6	2		1	1	2		1	Food	talk time and drinks	2	30	40	15	30	15	1	2	0	6	2	0	6	7	3	0	0	2	3
200-101	3	1	2	2	27	2	1	1	3	0	2	0				2		2		2	6	2		1	1	2		1	Food and Talk Time	2	other	50	20	other	50	20	2	0	6	6	0	6	7	14	6	14	2	1	1
200-111	3	1	2	2	52	1	1	6	3	0	2	0				2		2		2	6	2		2		2		2			other	30	10	other	30	10	3	0	6	6	0	6	1	2	14	5	2	1	2
200-112	3	1	2	2	30	other	1	1	4	3	2	0				2		2		2	6	2		2		2		2			1	0	20	1	97	20	1	0	6	2	0	6	10	10	0	0	5	1	1
200-116	3	1	2	2	21	4	3	1	3	3	2	0				2		2		2	6	2		2		2		2			1	0	20	1	97	20	1	0	6	1	0	6	3	0	0	0	7	3
200-117	3	1	2	2	28	4	2	1	3	5	2	0				2		2		2	6	2		2		2		2			other	25	10	other	20	10	1	0	6	6	0	6	5	14	7	7	2	1	1
200-121	3	1	2	2	41	1	2	1	3	0	2	0				2		2		2	6	2		1	1	2		2			other	20	10	6	97	10	1	0	6	6	0	6	2	7	7	5	2	1	1
200-122	3	2	2	1	30	1	3	1	3	0	2	0				2		2		2	6	2		2		2		2			1	0	25	1	97	25	0					6	3	2	0	0	2	1	2
200-126	3	1	2	1	29	5	2	1	1	0	2	0				2		2		2	6	2		2		2		2			1	0	10	1	97	10	2	0	6	6	0	6	2	4	2	2	2	1	1
200-127	3	2	2	2	19	1	3	1	1	0	2	0				2		2		2	6	2		2		2		2			1	0	15	1	97	15	0					6	3	0	0	0	6	3
200-131	3	1	2	2	24	1	2	1	1	0	2	0				2		2		2	6	2		2		2		2			other	25	15	other	20	15	2	0	6	6	0	6	2	5	3	3	2	1	1
200-132	3	2	2	1	52	1	3	1	3	0	2	0				2		2		2	6	2		1	1	2		2			other	20	10	other	20	15	1	0	6	1	0	6	2	2	0	0	2	1	2
200-136	3	1	2	2	46	1	4	1	3	0	2	0				2		2		2	6	2		1	1	2		2			other	25	15	other	25	15	1	0	6	1	0	6	2	0	1	0	3	1	2
200-137	3	1	2	1	25	1	2	1	1	0	2	0				2		2		2	6	2		2		2		2			other	30	10	other	15	10	2	0	6	6	0	6	3	7	5	3	2	1	1
200-141	3	1	2	1	29	1	3	1	3	0	2	0				2		2		2	6	2		1	1	2		2			other	35	15	other	35	15	1	0	6	6	0	6	2	3	0	0	3	1	2
200-141	3	1	2	2	27	other	2	1	3	0	2	0				2		2		2	6	2		2		2		2			other	100	20	other	97	20	3	0	6	6	0	6	2	10	7	5	2	1	1
200-146	3	1	2	2	20	1	3	1	1	0	2	0				2		2		2	6	2		2		2		2			1	0	15	1	97	15	1	0	6	1	0	6	2	7	0	0	6	3
200-162	3	1	2	2	32	2	2	1	3	0	2	0				2		2		2	6	2		2		2		2			other	100	30	other	97	20	3	0	6	6	0	6	3	5	3	3	5	3
200-166	3	1	2	2	41	1	3	1	3	0	2	0				2		2		2	6	2		1	1	2		2			other	35	20	other	35	20	1	0	6	6	0	6	3	3	4	0	2	1	2
200-211	3	1	2	2	10	other	1	1	1	1	2	0				2		2		2	6	2		2		2		2			1	0	10	1	97	30	1	0	1	2	0	6	5	5	5	0	2	3
200-216	3	1	2	1	4	other	1	1	1	1	2	0				2		2		2	6	2		2		2		2			1	0	10	5	10	60	1	0	1	1	0	6	6	6	6	0	2	3
200-221	3	1	2	2	24	4	3	1	1	1	2	0				2		2		2	6	2		1	1	2		2			5	4	10	5	10	5	2	0	1	6	0	6	2	0	2	1	5	3
200-236	3	1	2	1	17	other	2	1	1	1	2	0				2		2		2	6	2		1	1	2		2			6	30	10	1	30	25	2	0	6	6	0	6	3	3	1	0	7	3
200-241	3	1	2	2	2	other	other	1	1	1	2	0				2		2		2	6	2		2		2		2			1	0	60	6	40	30	1	0	1	1	0	6	7	7	0	0	7	3
200-246	3	2	2	2	36	1	2	1	3	1	2	0				2		2		2	6	2		1	1	2		2			6	35	10	1	35	20	2	0	1	6	0	6	5	5	2	0	2	3
200-251	3	1	2	1	32	1	3	1	3	1	2	0				2		2		2	6	2		1	1	2		2			6	50	10	1	50	30	2	0	1	1	0	6	5	5	3	0	1	1	2
200-256	3	1	2	2	6	other	other	1	1	1	2	0				2		2		2	6	2		1	1	2		2			6	50	40	5	60	40	2	0	1	1	0	6	4	4	4	0	2	3
200-261	3	1	2	2	20	1	3	1	1	1	2	0				2		2		2	6	2		1	1	2		2			5	5	10	1	97	20	1	0	1	1	0	6	4	4	1	0	5	3
200-262	3	1	2	2	20	other	3	1	3	1	2	0				2		2		2	6	2		1	1	2		2			5	10	10	1	10	20	2	0	1	97	0	6	2	2	0	0	5	3
200-271	3	1	2	2	24	1	3	1	3	1	2	0				2		2		2	6	2		1	1	2		2			6	50	10	6	50	10	2	0	1	1	0	6	4	4	1	0	5	3
200-276	3	1	2	1	25	1	4	1	1	2	2	0				2		2		2	6	2		1	1	2		2			6	45	10	6	45	10	3	1	1	1	0	6	6	6	2	0	6	3
200-276	3	1	2	1	25	1	4	1	1	2	2	0				2		2		2	6	2		1	1	2		2			6	45	10	6	45	10	3	1	1	1	0	6	6	6	2	0	6	3
200-281	3	2	2	2	29	1	2	1	3	1	2	0				2		2		2	6	2		1	1	2		2			6	30	10	5	30	5	1	0	1	97	0	6	3	3	0	0	2	3
200-286	3	1	2	1	21	1	3	1	1	1	2	0				2		2		2	6	2		1	1	2		4			6	30	15	5	40	35	1	0	1	1	0	6	3	3	0	0	4	1	3
200-296	3	1	2	1	4	2	other	1	1	1	2	0				2		2		2	6	2		1	1	2		2			6	70	20	5	25	30	5	0	1	6	0	6	2	2	0	0	7	3
200-301	3	2	2	1	30	1	3	1	3	1	2	0				2		2		2	6	2		1	1	2		2			6	50	15	5	50	30	3	0	1	1	0	6	3	0	1	0	2	3
200-311	3	1	2	2	28	1	3	1	3	1	2	0				2		2		2	6	2		2		2		2			1	0	15	1	97	15	3	0	6	1	0	6	3	3	1	0	5	3
200-316	3	1	2	1	25	2	1	1	1	2	2	0				2		2		2	6	2		1	1	2		2			6	50	15	6	50	15	3	0	1	6	0	6	4	4	2	0	1	3
200-326	3	1	2	2	23	1	2	1	1	1	2	0				2		2		2	6	2		1	1	2		2			6	60	15	5	97	25	2	0	1	1	0	6	1	5	2	0	5	3
200-476	3	1	2	2	22	1	1	1	3	1	2	0				2		2		2	6	2		1	1	2		2			other	80	12	other	97	12	3	0	6	1	0	6	10	8	2	0	5	3
200-486	3	1	2	2	17	4	3	1	1	2	2	0				2		2		2	6	2		2		2		2			1	0	15	1	97	15	1	0	6	6	0	6	5	0	5	0	6	3
200-491	3	2	2	1	23	1	2	1	3	1	2	0				2		2		2	6	2		2		2		2			1	0	15	1	97	10	1	0	6	6	0	6	3	0	3	0	4	3
200-501	3	1	2	1	15	1	2	1	1	1	2	0				2		2		2	6	2		2		2		2			1	0	10	1	97	10	1	0	6	6	0	6	2	0	2	0	6	3
200-506	3	1	2	2	39	1	2	1	3	1	2	0				2		2		2	6	2		1	1	2		2			other	50	10	other	50	10	1	0	1	6	0	6	3	0	3	0	2	3
200-511	3	1	2	2	2	2	other	1	3	1	2	0				2		2		2	6	2		2		2		2			6	0	10	6	97	10	3	0	6	6	0	6	2	0	2	99	5	3
200-516	3	1	2	1	78	other	2	1	5	1	2	0				2		2		2	6	2		1	1	2		2			other	55	10	other	55	10	1	0	6	1	0	6	6	2	4	0	4	3
200-876	3	2	2	2	36	2	2	1	4	1	2	0				2		2		2	6	2		2		2		2			other	20	10	other	20	10	1	0	6	1	0	6	3	1	3	0	5	3
300-101	2	1	2	2	50	1	1	1	5	0	2	0				2		2		2	1	2		1	1	2		2			other	30	10	other	30	10	1	0	6	1	0	6	3	3	0	0	2	1	1
300-106	2	2	2	1	11	other	1	1	1	0	2	0				2		2		2	6	2		1	1	2		2			other	30	10	other	30	10	1	0	6	6	0	6	2	2	1	0	7	3
300-111	2	1	2	2	3	other	other	1	1	0	2	0				2		2		2	6	2		1	1	2		2			other	50	20	other	50	20	1	0	6	1	0	6	2	2	0	0	5	3
300-126	2	2	2	2	28	1	4	1	1	0	2	0				2		2		2	6	2		1	1	2		2			other	60	15	other	60	15	0					6	2	3	0	0	3	1	2
300-131	2	4	2	1	23	1	2	1	1	0	2	0				2		2		2	6	2		2		2		2			1	0	10	1	97	10	0					6	3	3	1	0	7	3
300-146	2	1	1	2	53	2	2	1	5	0	2	0				2		2		2	6	2		2		2		1	Fruits	1	6	0	30	6	97	30	1	0	6	1	0	6	4	4	0	0	other	3
300-151	2	1	2	1	7	other	other	1	3	0	2	0				2		2		2	6	2		1	1	2		1	Food	2	other	30	20	other	30	20	1	0	6	2	0	6	5	5	0	0	7	3
300-152	2	1	2	2	37	1	2	1	3	0	2	0				2		2		2	6	2		2		2		2			other	0	15	other	97	10	1	0	6	6	0	6	3	3	0	0	5	3
300-156	2	4	2	2	23	1	2	1	1	0	2	0				2		2		2	6	2		2		2		2			1	0	10	1	97	0	0					6	3	2	1	0	5	3
300-211	2	1	2	2	17	other	1	1	1	1	2	0				2		2		2	6	2		1	1	2		2			6	40	20	1	40	45	3	0	1	1	0	6	5	5	2	0	7	3
300-221	2	1	2	2	8	other	2	1	1	0	2	0				2		2		2	6	2		1	1	2		2			6	45	10	other	45	10	2	0	6	1	0	6	3	3	0	0	7	3
300-231	2	1	2	2	26	1	3	1	3	1	2	0				2		2		2	6	2		1	1	2		2			other	50	20	5	50	20	1	0	6	1	0	6	4	4	1	0	5	3
300-236	2	other	2	1	32	1	4	6	3	1	2	0				2		2		2	6	2		1	1	2		2			other	35	10	5	35	10	1	0	6	6	0	6	3	3	1	0	2	3
300-256	2	1	2	2	26	1	4	1	1	1	2	0				2		2		2	6	2		2		2		2			1	0	10	1	97	10	1	0	6	6	0	6	3	1	1	0	6	3
300-276	2	1	2	2	2	other	other	1	1	1	2	0				2		2		2	6	2		1	1	2		2			other	60	30	5	60	30	2	0	6	1	0	6	1	1	0	0	7	3
300-291	2	other	1	1	21	1	1	1	1	1	2	0				2		2		2	6	2		1	2	2		2			6	350	97	6	97	120	3	0	2	1	0	6	3	3	1	0	2	3
300-306	2	other	1	1	45	1	other	1	5	1	2	0				2		2		2	6	2		1	2	2		2			6	250	97	5	97		3	0	6	1	0	6	3	1	2	0	other	3
300-311	2	1	2	2	16	1	3	1	1	1	2	0				2		2		2	6	2		1	1	2		2			other	35	15	1	15	15	2	0	6	1	0	6	3	1	2	0	6	3
300-321	2	1	2	2	8	other	1	1	1	1	2	0				2		2		2	6	2		2		2		2			1	0	10	1	97	10	1	0	6	6	0	6	2	2	0	0	7	3
300-331	2	other	2	1	4	other	other	1	1	1	2	0				2		2		2	6	2		2		2		2			1	0	20	1	97	20	1	0	6	6	0	6	3	3	0	0	7	3
300-341	2	1	2	1	16	1	1	1	1	1	2	0				2		2		2	6	2		2		2		2			1	0	30	1	97	30	1	0	6	6	0	6	3	2	1	0	8	3
300-342	2	1	2	2	22	1	2	1	2	0	2	0				2		2		2	6	3		3		3		2			5	5	10	other	97	15	1	0	6	6	0	6	7	30	5	5	2	1	1
300-356	2	other	2	1	15	1	2	1	1	1	2	0				2		2		2	6	2		2		2		2			6	50	15	6	50	15	1	0	1	97	0	6	1	1	3	99	8	3
300-361	2	1	2	2	40	1	other	1	3	1	2	0				2		2		2	6	2		1	1	2		1	Book for registry	1	other	45	15	other	45	15	0					6	2	99	2	99	8	3
300-376	2	1	2	2	24	4	2	1	1	1	2	0				2		2		2	6	2		1	6	2		2			1	0	22	1	97	22	1	0	6	6	0	6	3	2	3	0	8	3
300-386	2	1	1	2	59	1	other	1	5	1	2	0				2		2		2	6	2		2		2		2			other	200	97	other	97		2	0	6	1	0	6	3	1	2	0	other	3
300-391	2	1	2	1	16	1	2	1	1	1	2	0				2		2		2	6	2		1	1	2		2			6	80	15	6	40	15	3	0	6	6	0	6	2	1	1	0	6	3
300-397	2	1	2	1	4	5	2	1	1	1	2	0				2		2		2	6	2		2		2		2			1	0	20	1	97	20	1	0	6	6	0	6	2	0	2	0	6	3
300-491	2	1	2	1	28	1	2	1	1	0	2	0				2		2		2	6	2		1	1	2		2			5	5	20	1	97	30	1	0	1	6	0	6	2	3	0	1	8	1	1
300-501	2	1	2	2	25	2	2	1	3	0	2	0				2		2		2	6	2		1	1	2		1	Talk Time	1	other	25	15	5	97	15	2	0	6	6	0	6	3	4	0	1	5	3
300-521	2	1	1	2	71	1	2	1	2	1	2	0				2		2		2	6	2		1	1	2		2			5	25	60	5	20	45	1	0	6	6	0	6	3	0	0	1	other	3
300-526	2	1	2	2	30	other	2	1	3	0	2	0				2		2		2	6	2		1	1	2		1	Food and Talk Time	1	other	10	15	1	97	20	4	0	1	6	0	6	5	2	3	1	2	1	1
300-536	2	1	2	2	29	1	3	1	1	0	2	0				2		2		2	6	2		1	1	2		2			other	30	20	1	97	20	2	0	6	6	0	6	4	3	1	1	2	1	1
100-151	1	1	2	1	32	3	2	6	2	1	3	0				2		2		2	6	2		2		2		2			other	20	15	other	20	15	1	0	6	6	0	6	14	10	9	99	1	3
200-291	3	1	2	2	27	other	3	1	3	1			4	2		2		2		2		2		1	1	2		4			6	30	97	5	50	30	3	0	1	1	0	97	3	3	0	0	2	3
200-321	3	1	2	1	40	1	3	1	3	1						2		2		2		2		1	1	2		4			6	30	10	5	40	20	3	0	1	1	0	97	3	2	1	0	2	3
300-216	2	1	2	1	48	1	3	1	3	1			4	2		2		2		2		2		1	1	2		2			6	70	97	5	50	30	0					97	4	3	1	0	4	1	97
300-226	3	1	2	1	19	1	2	1	1	1						2		2		2		2		2		2		2			1	0	10	1	97	10	1	0	97	1	0	97	6	5	1	0	7	3
300-241	2	1	2	2	14	1	1	1	1	1						2		2		2		2		2		2		2			1	0	97	1	97	30	2	0	97	1	0	97	4	3	1	0	6	3
300-246	2	1	2	1	47	1	4	1	3	1						2		2		2		2		1	1	2		2			6	40	97	1	40	35	1	0	1	1	0	97	5	4	1	0	5	3
300-261	3	1	2	2	28	1	3	1	3	1						2		2		2		2		1	1	2		4			6	40	15	5	50	30	2	0	1	1	0	97	3	2	1	0	2	3
300-266	3	1	2	2	16	1	4	1	1	1						2		2		2		2		1	1	2		3			6	35	20	5	45	30	3	0	1	1	0	97	4	3	1	0	6	3
300-271	2	1	2	2	22	1	1	1	2	1						2		2		2		2		1	1	2		2			1	50	20	1	50	40	3	0	1	1	0	97	4	3	1	0	5	3
300-286	2	1	2	1	52	other	1	1	5	1						2		2		2		2		1	1	2		2			6	30	97	1	97	35	3	0	1	1	0	97	3	2	1	0	2	3
300-301	other	1	2	2	35	other	2	1	2	1						2		2		2		2		1	1	2		2			6	70	97	6	97	40	5	0	1	97	0	97	2	1	1	0	8	1	3
300-307	3	1	2	2	28	2	2	1	3	1						2		2		2		2		2		2		2			1	0	17	1	97	17	1	0	97	1	0	97	1	0	3	0	5	3
300-316	2	1	2	2	35	1	2	1	3	1						2		2		2		2		1	1	2		2			6	40	97	5	97	30	0					97	3	2	1	0	2	3
300-326	2	1	2	1	11	2	1	1	1	1						2		2		2		2		1	1	2		4			6	30	15	5	35	30	0					97	4	3	1	0	2	3
300-336	2	1	2	2	8	other	1	1	1	1						2		2		2		2		1	1	2		3			6	20	10	5	25	97	3	0	1	97	0	97	2	1	1	0	2	3
300-396	other	1	1	2	27	other	1	1	3	1						2		2		2		2		1	2	2		2			6	418	97	5	97	90	2	0	2	97	0	97	4	2	2	0	2	3
[truncated: 79 more columns]

## Sheet: hh cholera patient level data
Facility ID	Facility name	Province	pt-id	pt_age	pt_sex	pt_weight	drug_used									ors	ors_packaging	ors_price	ringers_packaging	ringers_price	doxy-packaging	doxy_price	cipro-packaging	cipro_price	azithro-packaging	azithro_price	zinc-packaging	zinc_price													carebook	file	gloves	cannula	collection pot	10cc syringe	5cc syringe	stool test	dipstick
# a1	a2	a3	b2	b3	b4	b5	c	c1	c2	c3	c4	c5	c6	c7	c8	d	d1	d1a_	d2_	D2A_	d3	d3a	d4	d4a	d5	d5a	d6	d6a	d7	d8	GROUP_MATERIALS_USED_E1B	GROUP_MATERIALS_USED_E3B	GROUP_MATERIALS_USED_E4B	GROUP_MATERIALS_USED_E5B	GROUP_MATERIALS_USED_E6B	GROUP_MATERIALS_USED_E7B	GROUP_MATERIALS_USED_E8B	GROUP_MATERIALS_USED_E9B	GROUP_MATERIALS_USED_E10B	E11B	GROUP_MATERIALS_USED1_F1C	GROUP_MATERIALS_USED1_F3C	GROUP_MATERIALS_USED1_F4C	GROUP_MATERIALS_USED1_F5C	GROUP_MATERIALS_USED1_F6C	GROUP_MATERIALS_USED1_F7C	GROUP_MATERIALS_USED1_F8C	GROUP_MATERIALS_USED1_F9C	GROUP_MATERIALS_USED1_F10C
1	1	1	101	41	1		4				500mg×2×3x3					1	3x3.50	10.5													1	0	0	0	0	0	0	0	0		979797	979797	979797	979797	979797	979797	979797	979797	979797
1	1	1	101	41	1		2		500mlsx2x2							1	3x3.50	10.5													1	0	0	0	0	0	0	0	0		979797	979797	979797	979797	979797	979797	979797	979797	979797
1	1	1	101	41	1		6						500mgx2x3x3			1	3x3.50	10.5													1	0	0	0	0	0	0	0	0		979797	979797	979797	979797	979797	979797	979797	979797	979797
1	1	1	101	41	1		1	25mgx2x3								1	3x3.50	10.5													1	0	0	0	0	0	0	0	0		979797	979797	979797	979797	979797	979797	979797	979797	979797
1	1	1	101	41	1		4				500mg×2×3x3					2			4x25	100											1	0	0	0	0	0	0	0	0		979797	979797	979797	979797	979797	979797	979797	979797	979797
1	1	1	101	41	1		2		500mlsx2x2							2			4x25	100											1	0	0	0	0	0	0	0	0		979797	979797	979797	979797	979797	979797	979797	979797	979797
1	1	1	101	41	1		6						500mgx2x3x3			2			4x25	100											1	0	0	0	0	0	0	0	0		979797	979797	979797	979797	979797	979797	979797	979797	979797
1	1	1	101	41	1		1	25mgx2x3								2			4x25	100											1	0	0	0	0	0	0	0	0		979797	979797	979797	979797	979797	979797	979797	979797	979797
1	1	1	101	41	1		4				500mg×2×3x3					6											2.25x18	40.5			1	0	0	0	0	0	0	0	0		979797	979797	979797	979797	979797	979797	979797	979797	979797
1	1	1	101	41	1		2		500mlsx2x2							6											2.25x18	40.5			1	0	0	0	0	0	0	0	0		979797	979797	979797	979797	979797	979797	979797	979797	979797
1	1	1	101	41	1		6						500mgx2x3x3			6											2.25x18	40.5			1	0	0	0	0	0	0	0	0		979797	979797	979797	979797	979797	979797	979797	979797	979797
1	1	1	101	41	1		1	25mgx2x3								6											2.25x18	40.5			1	0	0	0	0	0	0	0	0		979797	979797	979797	979797	979797	979797	979797	979797	979797
1	1	1	101	41	1		4				500mg×2×3x3					3					1.50x18	27									1	0	0	0	0	0	0	0	0		979797	979797	979797	979797	979797	979797	979797	979797	979797
1	1	1	101	41	1		2		500mlsx2x2							3					1.50x18	27									1	0	0	0	0	0	0	0	0		979797	979797	979797	979797	979797	979797	979797	979797	979797
1	1	1	101	41	1		6						500mgx2x3x3			3					1.50x18	27									1	0	0	0	0	0	0	0	0		979797	979797	979797	979797	979797	979797	979797	979797	979797
1	1	1	101	41	1		1	25mgx2x3								3					1.50x18	27									1	0	0	0	0	0	0	0	0		979797	979797	979797	979797	979797	979797	979797	979797	979797
1	1	1	101	41	1		4				500mg×2×3x3					2			4x25	100											1	0	0	0	0	0	0	0	0		979797	979797	979797	979797	979797	979797	979797	979797	979797
1	1	1	101	41	1		2		500mlsx2x2							2			4x25	100											1	0	0	0	0	0	0	0	0		979797	979797	979797	979797	979797	979797	979797	979797	979797
1	1	1	101	41	1		6						500mgx2x3x3			2			4x25	100											1	0	0	0	0	0	0	0	0		979797	979797	979797	979797	979797	979797	979797	979797	979797
1	1	1	101	41	1		1	25mgx2x3								2			4x25	100											1	0	0	0	0	0	0	0	0		979797	979797	979797	979797	979797	979797	979797	979797	979797
1	1	1	102	36	1		6						100mlx2x3x3			6											1x22.50	22.5			1	1	0	0	0	0	0	0	0		979797	979797	979797	979797	979797	979797	979797	979797	979797
1	1	1	102	36	1		4				500mg/×2×3x3					6											1x22.50	22.5			1	1	0	0	0	0	0	0	0		979797	979797	979797	979797	979797	979797	979797	979797	979797
1	1	1	102	36	1		1	25mg×2x3								6											1x22.50	22.5			1	1	0	0	0	0	0	0	0		979797	979797	979797	979797	979797	979797	979797	979797	979797
1	1	1	102	36	1		6						100mlx2x3x3			3					18x1.50	27									1	1	0	0	0	0	0	0	0		979797	979797	979797	979797	979797	979797	979797	979797	979797
1	1	1	102	36	1		4				500mg/×2×3x3					3					18x1.50	27									1	1	0	0	0	0	0	0	0		979797	979797	979797	979797	979797	979797	979797	979797	979797
1	1	1	102	36	1		1	25mg×2x3								3					18x1.50	27									1	1	0	0	0	0	0	0	0		979797	979797	979797	979797	979797	979797	979797	979797	979797
1	1	1	102	36	1		6						100mlx2x3x3			1	3x3.50	10.5													1	1	0	0	0	0	0	0	0		979797	979797	979797	979797	979797	979797	979797	979797	979797
1	1	1	102	36	1		4				500mg/×2×3x3					1	3x3.50	10.5													1	1	0	0	0	0	0	0	0		979797	979797	979797	979797	979797	979797	979797	979797	979797
1	1	1	102	36	1		1	25mg×2x3								1	3x3.50	10.5													1	1	0	0	0	0	0	0	0		979797	979797	979797	979797	979797	979797	979797	979797	979797
1	1	1	103	36	2		2		500mlsx2x2							1	3x3.50	10.5											0	0	1	0	0	0	0	0	0	0	0	0	979797	979797	979797	979797	979797	979797	979797	979797	979797
1	1	1	103	36	2		1	25mgx2x3								1	3x3.50	10.5											0	0	1	0	0	0	0	0	0	0	0	0	979797	979797	979797	979797	979797	979797	979797	979797	979797
1	1	1	103	36	2		4				500mgx2x3x3					1	3x3.50	10.5											0	0	1	0	0	0	0	0	0	0	0	0	979797	979797	979797	979797	979797	979797	979797	979797	979797
1	1	1	103	36	2		6						500mgx2x3x3			1	3x3.50	10.5											0	0	1	0	0	0	0	0	0	0	0	0	979797	979797	979797	979797	979797	979797	979797	979797	979797
1	1	1	103	36	2		2		500mlsx2x2							6											2.25x18	40.5	0	0	1	0	0	0	0	0	0	0	0	0	979797	979797	979797	979797	979797	979797	979797	979797	979797
1	1	1	103	36	2		1	25mgx2x3								6											2.25x18	40.5	0	0	1	0	0	0	0	0	0	0	0	0	979797	979797	979797	979797	979797	979797	979797	979797	979797
1	1	1	103	36	2		4				500mgx2x3x3					6											2.25x18	40.5	0	0	1	0	0	0	0	0	0	0	0	0	979797	979797	979797	979797	979797	979797	979797	979797	979797
1	1	1	103	36	2		6						500mgx2x3x3			6											2.25x18	40.5	0	0	1	0	0	0	0	0	0	0	0	0	979797	979797	979797	979797	979797	979797	979797	979797	979797
1	1	1	103	36	2		2		500mlsx2x2							3					1.50x18	27							0	0	1	0	0	0	0	0	0	0	0	0	979797	979797	979797	979797	979797	979797	979797	979797	979797
1	1	1	103	36	2		1	25mgx2x3								3					1.50x18	27							0	0	1	0	0	0	0	0	0	0	0	0	979797	979797	979797	979797	979797	979797	979797	979797	979797
1	1	1	103	36	2		4				500mgx2x3x3					3					1.50x18	27							0	0	1	0	0	0	0	0	0	0	0	0	979797	979797	979797	979797	979797	979797	979797	979797	979797
1	1	1	103	36	2		6						500mgx2x3x3			3					1.50x18	27							0	0	1	0	0	0	0	0	0	0	0	0	979797	979797	979797	979797	979797	979797	979797	979797	979797
1	1	1	104	35	1		2		500mlsx2x2							6											2.25x18	40.5	0	0	1	0	0	0	0	0	0	0	0	0	979797	979797	979797	979797	979797	979797	979797	979797	979797
1	1	1	104	35	1		1	25mgx2x3								6											2.25x18	40.5	0	0	1	0	0	0	0	0	0	0	0	0	979797	979797	979797	979797	979797	979797	979797	979797	979797
1	1	1	104	35	1		4				500mgx2x3x3					6											2.25x18	40.5	0	0	1	0	0	0	0	0	0	0	0	0	979797	979797	979797	979797	979797	979797	979797	979797	979797
1	1	1	104	35	1		6						500mgx2x3x3			6											2.25x18	40.5	0	0	1	0	0	0	0	0	0	0	0	0	979797	979797	979797	979797	979797	979797	979797	979797	979797
1	1	1	104	35	1		2		500mlsx2x2							1	3x3.50	10.5											0	0	1	0	0	0	0	0	0	0	0	0	979797	979797	979797	979797	979797	979797	979797	979797	979797
1	1	1	104	35	1		1	25mgx2x3								1	3x3.50	10.5											0	0	1	0	0	0	0	0	0	0	0	0	979797	979797	979797	979797	979797	979797	979797	979797	979797
1	1	1	104	35	1		4				500mgx2x3x3					1	3x3.50	10.5											0	0	1	0	0	0	0	0	0	0	0	0	979797	979797	979797	979797	979797	979797	979797	979797	979797
1	1	1	104	35	1		6						500mgx2x3x3			1	3x3.50	10.5											0	0	1	0	0	0	0	0	0	0	0	0	979797	979797	979797	979797	979797	979797	979797	979797	979797
1	1	1	104	35	1		2		500mlsx2x2							3					1.50x18	27							0	0	1	0	0	0	0	0	0	0	0	0	979797	979797	979797	979797	979797	979797	979797	979797	979797
1	1	1	104	35	1		1	25mgx2x3								3					1.50x18	27							0	0	1	0	0	0	0	0	0	0	0	0	979797	979797	979797	979797	979797	979797	979797	979797	979797
1	1	1	104	35	1		4				500mgx2x3x3					3					1.50x18	27							0	0	1	0	0	0	0	0	0	0	0	0	979797	979797	979797	979797	979797	979797	979797	979797	979797
1	1	1	104	35	1		6						500mgx2x3x3			3					1.50x18	27							0	0	1	0	0	0	0	0	0	0	0	0	979797	979797	979797	979797	979797	979797	979797	979797	979797
1	1	1	105	49	1		4				500mgx2x3x3			0	0	1	3x3.50	10.5											0	0	1	0	0	0	0	0	0	0	0		979797	979797	979797	979797	979797	979797	979797	979797	979797
1	1	1	105	49	1		1	25mgx2x3						0	0	1	3x3.50	10.5											0	0	1	0	0	0	0	0	0	0	0		979797	979797	979797	979797	979797	979797	979797	979797	979797
1	1	1	105	49	1		2		500mlsx2x2					0	0	1	3x3.50	10.5											0	0	1	0	0	0	0	0	0	0	0		979797	979797	979797	979797	979797	979797	979797	979797	979797
1	1	1	105	49	1		6						100mlsx2x3x3	0	0	1	3x3.50	10.5											0	0	1	0	0	0	0	0	0	0	0		979797	979797	979797	979797	979797	979797	979797	979797	979797
1	1	1	105	49	1		4				500mgx2x3x3			0	0	6											2.25x18	40.5	0	0	1	0	0	0	0	0	0	0	0		979797	979797	979797	979797	979797	979797	979797	979797	979797
1	1	1	105	49	1		1	25mgx2x3						0	0	6											2.25x18	40.5	0	0	1	0	0	0	0	0	0	0	0		979797	979797	979797	979797	979797	979797	979797	979797	979797
1	1	1	105	49	1		2		500mlsx2x2					0	0	6											2.25x18	40.5	0	0	1	0	0	0	0	0	0	0	0		979797	979797	979797	979797	979797	979797	979797	979797	979797
1	1	1	105	49	1		6						100mlsx2x3x3	0	0	6											2.25x18	40.5	0	0	1	0	0	0	0	0	0	0	0		979797	979797	979797	979797	979797	979797	979797	979797	979797
1	1	1	105	49	1		4				500mgx2x3x3			0	0	3					1.50x18	27							0	0	1	0	0	0	0	0	0	0	0		979797	979797	979797	979797	979797	979797	979797	979797	979797
1	1	1	105	49	1		1	25mgx2x3						0	0	3					1.50x18	27							0	0	1	0	0	0	0	0	0	0	0		979797	979797	979797	979797	979797	979797	979797	979797	979797
1	1	1	105	49	1		2		500mlsx2x2					0	0	3					1.50x18	27							0	0	1	0	0	0	0	0	0	0	0		979797	979797	979797	979797	979797	979797	979797	979797	979797
1	1	1	105	49	1		6						100mlsx2x3x3	0	0	3					1.50x18	27							0	0	1	0	0	0	0	0	0	0	0		979797	979797	979797	979797	979797	979797	979797	979797	979797
1	1	1	106	90	1		4				500mg×2x3×3			0	0	6											2.25x18	40.5			1	0	0	0	0	0	0	0	0		979797	979797	979797	979797	979797	979797	979797	979797	979797
1	1	1	106	90	1		1	25mgx2x3						0	0	6											2.25x18	40.5			1	0	0	0	0	0	0	0	0		979797	979797	979797	979797	979797	979797	979797	979797	979797
1	1	1	106	90	1		6						500mgx2x3x3	0	0	6											2.25x18	40.5			1	0	0	0	0	0	0	0	0		979797	979797	979797	979797	979797	979797	979797	979797	979797
1	1	1	106	90	1		4				500mg×2x3×3			0	0	6											2.25x18	40.5			1	0	0	0	0	0	0	0	0		979797	979797	979797	979797	979797	979797	979797	979797	979797
1	1	1	106	90	1		1	25mgx2x3						0	0	6											2.25x18	40.5			1	0	0	0	0	0	0	0	0		979797	979797	979797	979797	979797	979797	979797	979797	979797
1	1	1	106	90	1		6						500mgx2x3x3	0	0	6											2.25x18	40.5			1	0	0	0	0	0	0	0	0		979797	979797	979797	979797	979797	979797	979797	979797	979797
1	1	1	106	90	1		4				500mg×2x3×3			0	0	1	3x3.50	10.5													1	0	0	0	0	0	0	0	0		979797	979797	979797	979797	979797	979797	979797	979797	979797
1	1	1	106	90	1		1	25mgx2x3						0	0	1	3x3.50	10.5													1	0	0	0	0	0	0	0	0		979797	979797	979797	979797	979797	979797	979797	979797	979797
1	1	1	106	90	1		6						500mgx2x3x3	0	0	1	3x3.50	10.5													1	0	0	0	0	0	0	0	0		979797	979797	979797	979797	979797	979797	979797	979797	979797
1	1	1	106	90	1		4				500mg×2x3×3			0	0	1	3x3.50	10.5													1	0	0	0	0	0	0	0	0		979797	979797	979797	979797	979797	979797	979797	979797	979797
1	1	1	106	90	1		1	25mgx2x3						0	0	1	3x3.50	10.5													1	0	0	0	0	0	0	0	0		979797	979797	979797	979797	979797	979797	979797	979797	979797
1	1	1	106	90	1		6						500mgx2x3x3	0	0	1	3x3.50	10.5													1	0	0	0	0	0	0	0	0		979797	979797	979797	979797	979797	979797	979797	979797	979797
1	1	1	106	90	1		4				500mg×2x3×3			0	0	3					1.50x18	27									1	0	0	0	0	0	0	0	0		979797	979797	979797	979797	979797	979797	979797	979797	979797
1	1	1	106	90	1		1	25mgx2x3						0	0	3					1.50x18	27									1	0	0	0	0	0	0	0	0		979797	979797	979797	979797	979797	979797	979797	979797	979797
1	1	1	106	90	1		6						500mgx2x3x3	0	0	3					1.50x18	27									1	0	0	0	0	0	0	0	0		979797	979797	979797	979797	979797	979797	979797	979797	979797
1	1	1	106	90	1		4				500mg×2x3×3			0	0	3					1.50x18	27									1	0	0	0	0	0	0	0	0		979797	979797	979797	979797	979797	979797	979797	979797	979797
1	1	1	106	90	1		1	25mgx2x3						0	0	3					1.50x18	27									1	0	0	0	0	0	0	0	0		979797	979797	979797	979797	979797	979797	979797	979797	979797
1	1	1	106	90	1		6						500mgx2x3x3	0	0	3					1.50x18	27									1	0	0	0	0	0	0	0	0		979797	979797	979797	979797	979797	979797	979797	979797	979797
1	1	1	107	42	1		1	25mgx2x3								1	3x3.50	10.5											0	0	1	0	0	0	0	0	0	0	0		979797	979797	979797	979797	979797	979797	979797	979797	979797
1	1	1	107	42	1		4				500mg×2x3x3					1	3x3.50	10.5											0	0	1	0	0	0	0	0	0	0	0		979797	979797	979797	979797	979797	979797	979797	979797	979797
1	1	1	107	42	1		1	25mgx2x3								3					1.50x18	27							0	0	1	0	0	0	0	0	0	0	0		979797	979797	979797	979797	979797	979797	979797	979797	979797
1	1	1	107	42	1		4				500mg×2x3x3					3					1.50x18	27							0	0	1	0	0	0	0	0	0	0	0		979797	979797	979797	979797	979797	979797	979797	979797	979797
1	1	1	108	27	1		4				500mg×2x3x3					1	3x3.50	10.5											0	0	1	0	0	0	0	0	0	0	0		979797	979797	979797	979797	979797	979797	979797	979797	979797
1	1	1	108	27	1		1	25mgx2x3								1	3x3.50	10.5											0	0	1	0	0	0	0	0	0	0	0		979797	979797	979797	979797	979797	979797	979797	979797	979797
1	1	1	108	27	1		6						100mlsx2x3x3			1	3x3.50	10.5											0	0	1	0	0	0	0	0	0	0	0		979797	979797	979797	979797	979797	979797	979797	979797	979797
1	1	1	108	27	1		4				500mg×2x3x3					3					1.50x18	27							0	0	1	0	0	0	0	0	0	0	0		979797	979797	979797	979797	979797	979797	979797	979797	979797
1	1	1	108	27	1		1	25mgx2x3								3					1.50x18	27							0	0	1	0	0	0	0	0	0	0	0		979797	979797	979797	979797	979797	979797	979797	979797	979797
1	1	1	108	27	1		6						100mlsx2x3x3			3					1.50x18	27							0	0	1	0	0	0	0	0	0	0	0		979797	979797	979797	979797	979797	979797	979797	979797	979797
1	1	1	108	27	1		4				500mg×2x3x3					6											2.25x18	40.5	0	0	1	0	0	0	0	0	0	0	0		979797	979797	979797	979797	979797	979797	979797	979797	979797
1	1	1	108	27	1		1	25mgx2x3								6											2.25x18	40.5	0	0	1	0	0	0	0	0	0	0	0		979797	979797	979797	979797	979797	979797	979797	979797	979797
1	1	1	108	27	1		6						100mlsx2x3x3			6											2.25x18	40.5	0	0	1	0	0	0	0	0	0	0	0		979797	979797	979797	979797	979797	979797	979797	979797	979797
1	1	1	109	32	1		2		500mgx2x2							3					1.50x18	27									1	0	0	0	0	0	0	0	0		979797	979797	979797	979797	979797	979797	979797	979797	979797
1	1	1	109	32	1		1	25mgx2x3								3					1.50x18	27									1	0	0	0	0	0	0	0	0		979797	979797	979797	979797	979797	979797	979797	979797	979797
1	1	1	109	32	1		4				500mgx2x3x3					3					1.50x18	27									1	0	0	0	0	0	0	0	0		979797	979797	979797	979797	979797	979797	979797	979797	979797
1	1	1	109	32	1		2		500mgx2x2							1	3x3.50	10.5													1	0	0	0	0	0	0	0	0		979797	979797	979797	979797	979797	979797	979797	979797	979797
1	1	1	109	32	1		1	25mgx2x3								1	3x3.50	10.5													1	0	0	0	0	0	0	0	0		979797	979797	979797	979797	979797	979797	979797	979797	979797
1	1	1	109	32	1		4				500mgx2x3x3					1	3x3.50	10.5													1	0	0	0	0	0	0	0	0		979797	979797	979797	979797	979797	979797	979797	979797	979797
1	1	1	109	32	1		2		500mgx2x2							2			4x25	100											1	0	0	0	0	0	0	0	0		979797	979797	979797	979797	979797	979797	979797	979797	979797
1	1	1	109	32	1		1	25mgx2x3								2			4x25	100											1	0	0	0	0	0	0	0	0		979797	979797	979797	979797	979797	979797	979797	979797	979797
1	1	1	109	32	1		4				500mgx2x3x3					2			4x25	100											1	0	0	0	0	0	0	0	0		979797	979797	979797	979797	979797	979797	979797	979797	979797
1	1	1	110	28	1		1	25mgx2x3								2			4x25	100											1	0	0	0	0	0	0	0	0	0	979797	979797	979797	979797	979797	979797	979797	979797	979797
1	1	1	110	28	1		2		500mgx2x2							2			4x25	100											1	0	0	0	0	0	0	0	0	0	979797	979797	979797	979797	979797	979797	979797	979797	979797
1	1	1	110	28	1		4				500mg×2x3x3					2			4x25	100											1	0	0	0	0	0	0	0	0	0	979797	979797	979797	979797	979797	979797	979797	979797	979797
1	1	1	110	28	1		1	25mgx2x3								6											2.25x18	100			1	0	0	0	0	0	0	0	0	0	979797	979797	979797	979797	979797	979797	979797	979797	979797
1	1	1	110	28	1		2		500mgx2x2							6											2.25x18	100			1	0	0	0	0	0	0	0	0	0	979797	979797	979797	979797	979797	979797	979797	979797	979797
1	1	1	110	28	1		4				500mg×2x3x3					6											2.25x18	100			1	0	0	0	0	0	0	0	0	0	979797	979797	979797	979797	979797	979797	979797	979797	979797
1	1	1	110	28	1		1	25mgx2x3								1	3x3.50	10.5													1	0	0	0	0	0	0	0	0	0	979797	979797	979797	979797	979797	979797	979797	979797	979797
1	1	1	110	28	1		2		500mgx2x2							1	3x3.50	10.5													1	0	0	0	0	0	0	0	0	0	979797	979797	979797	979797	979797	979797	979797	979797	979797
1	1	1	110	28	1		4				500mg×2x3x3					1	3x3.50	10.5													1	0	0	0	0	0	0	0	0	0	979797	979797	979797	979797	979797	979797	979797	979797	979797
1	1	1	110	28	1		1	25mgx2x3								3					1.50x18	27									1	0	0	0	0	0	0	0	0	0	979797	979797	979797	979797	979797	979797	979797	979797	979797
1	1	1	110	28	1		2		500mgx2x2							3					1.50x18	27									1	0	0	0	0	0	0	0	0	0	979797	979797	979797	979797	979797	979797	979797	979797	979797
1	1	1	110	28	1		4				500mg×2x3x3					3					1.50x18	27									1	0	0	0	0	0	0	0	0	0	979797	979797	979797	979797	979797	979797	979797	979797	979797
1	1	1	111	22	2		4				500mg×2x3x3					3					1.50x18	27									1	0	0	0	0	0	0	0	0		979797	979797	979797	979797	979797	979797	979797	979797	979797
1	1	1	111	22	2		6						500mgx2x3x3			3					1.50x18	27									1	0	0	0	0	0	0	0	0		979797	979797	979797	979797	979797	979797	979797	979797	979797
1	1	1	111	22	2		1	25mgx2x3								3					1.50x18	27									1	0	0	0	0	0	0	0	0		979797	979797	979797	979797	979797	979797	979797	979797	979797
1	1	1	111	22	2		4				500mg×2x3x3					1	3x3.50	10.5													1	0	0	0	0	0	0	0	0		979797	979797	979797	979797	979797	979797	979797	979797	979797
1	1	1	111	22	2		6						500mgx2x3x3			1	3x3.50	10.5													1	0	0	0	0	0	0	0	0		979797	979797	979797	979797	979797	979797	979797	979797	979797
1	1	1	111	22	2		1	25mgx2x3								1	3x3.50	10.5													1	0	0	0	0	0	0	0	0		979797	979797	979797	979797	979797	979797	979797	979797	979797
1	1	1	111	22	2		4				500mg×2x3x3					6											2.25x18	100			1	0	0	0	0	0	0	0	0		979797	979797	979797	979797	979797	979797	979797	979797	979797
1	1	1	111	22	2		6						500mgx2x3x3			6											2.25x18	100			1	0	0	0	0	0	0	0	0		979797	979797	979797	979797	979797	979797	979797	979797	979797
1	1	1	111	22	2		1	25mgx2x3								6											2.25x18	100			1	0	0	0	0	0	0	0	0		979797	979797	979797	979797	979797	979797	979797	979797	979797
1	1	1	112	35	1		6						500mgx2x3x3			2			4x25	100											1	0	0	0	0	0	0	0	0		979797	979797	979797	979797	979797	979797	979797	979797	979797
1	1	1	112	35	1		2		500mlsx2x2							2			4x25	100											1	0	0	0	0	0	0	0	0		979797	979797	979797	979797	979797	979797	979797	979797	979797
1	1	1	112	35	1		4				500mgx2x3x3					2			4x25	100											1	0	0	0	0	0	0	0	0		979797	979797	979797	979797	979797	979797	979797	979797	979797
1	1	1	112	35	1		1	25mgx2x3								2			4x25	100											1	0	0	0	0	0	0	0	0		979797	979797	979797	979797	979797	979797	979797	979797	979797
1	1	1	112	35	1		6						500mgx2x3x3			1	3x3.50	10.5													1	0	0	0	0	0	0	0	0		979797	979797	979797	979797	979797	979797	979797	979797	979797
1	1	1	112	35	1		2		500mlsx2x2							1	3x3.50	10.5													1	0	0	0	0	0	0	0	0		979797	979797	979797	979797	979797	979797	979797	979797	979797
1	1	1	112	35	1		4				500mgx2x3x3					1	3x3.50	10.5													1	0	0	0	0	0	0	0	0		979797	979797	979797	979797	979797	979797	979797	979797	979797
1	1	1	112	35	1		1	25mgx2x3								1	3x3.50	10.5													1	0	0	0	0	0	0	0	0		979797	979797	979797	979797	979797	979797	979797	979797	979797
1	1	1	112	35	1		6						500mgx2x3x3			6											2.25x18	100			1	0	0	0	0	0	0	0	0		979797	979797	979797	979797	979797	979797	979797	979797	979797
1	1	1	112	35	1		2		500mlsx2x2							6											2.25x18	100			1	0	0	0	0	0	0	0	0		979797	979797	979797	979797	979797	979797	979797	979797	979797
1	1	1	112	35	1		4				500mgx2x3x3					6											2.25x18	100			1	0	0	0	0	0	0	0	0		979797	979797	979797	979797	979797	979797	979797	979797	979797
1	1	1	112	35	1		1	25mgx2x3								6											2.25x18	100			1	0	0	0	0	0	0	0	0		979797	979797	979797	979797	979797	979797	979797	979797	979797
1	1	1	112	35	1		6						500mgx2x3x3			3					1.50x18	27									1	0	0	0	0	0	0	0	0		979797	979797	979797	979797	979797	979797	979797	979797	979797
1	1	1	112	35	1		2		500mlsx2x2							3					1.50x18	27									1	0	0	0	0	0	0	0	0		979797	979797	979797	979797	979797	979797	979797	979797	979797
1	1	1	112	35	1		4				500mgx2x3x3					3					1.50x18	27									1	0	0	0	0	0	0	0	0		979797	979797	979797	979797	979797	979797	979797	979797	979797
1	1	1	112	35	1		1	25mgx2x3								3					1.50x18	27									1	0	0	0	0	0	0	0	0		979797	979797	979797	979797	979797	979797	979797	979797	979797
1	1	1	113	2	2		1	25mgx2x3						0	0	1	3x3.50	10.5													1	0	0	0	0	0	0	0	0		979797	979797	979797	979797	979797	979797	979797	979797	979797
1	1	1	113	2	2		5					100mlx3x3		0	0	1	3x3.50	10.5													1	0	0	0	0	0	0	0	0		979797	979797	979797	979797	979797	979797	979797	979797	979797
1	1	1	113	2	2		1	25mgx2x3						0	0	5									1x36	36					1	0	0	0	0	0	0	0	0		979797	979797	979797	979797	979797	979797	979797	979797	979797
1	1	1	113	2	2		5					100mlx3x3		0	0	5									1x36	36					1	0	0	0	0	0	0	0	0		979797	979797	979797	979797	979797	979797	979797	979797	979797
1	1	1	114	6	2		5					100mlsx3x3				1	3x3.50	10.5													1	0	0	0	0	0	0	0	0		979797	979797	979797	979797	979797	979797	979797	979797	979797
1	1	1	114	6	2		1	25mgx2x3								1	3x3.50	10.5													1	0	0	0	0	0	0	0	0		979797	979797	979797	979797	979797	979797	979797	979797	979797
1	1	1	114	6	2		2		500mlsx2x2							1	3x3.50	10.5													1	0	0	0	0	0	0	0	0		979797	979797	979797	979797	979797	979797	979797	979797	979797
1	1	1	114	6	2		5					100mlsx3x3				2			4x25	100											1	0	0	0	0	0	0	0	0		979797	979797	979797	979797	979797	979797	979797	979797	979797
1	1	1	114	6	2		1	25mgx2x3								2			4x25	100											1	0	0	0	0	0	0	0	0		979797	979797	979797	979797	979797	979797	979797	979797	979797
1	1	1	114	6	2		2		500mlsx2x2							2			4x25	100											1	0	0	0	0	0	0	0	0		979797	979797	979797	979797	979797	979797	979797	979797	979797
1	1	1	114	6	2		5					100mlsx3x3				5									1x36	36					1	0	0	0	0	0	0	0	0		979797	979797	979797	979797	979797	979797	979797	979797	979797
1	1	1	114	6	2		1	25mgx2x3								5									1x36	36					1	0	0	0	0	0	0	0	0		979797	979797	979797	979797	979797	979797	979797	979797	979797
1	1	1	114	6	2		2		500mlsx2x2							5									1x36	36					1	0	0	0	0	0	0	0	0		979797	979797	979797	979797	979797	979797	979797	979797	979797
1	1	1	201	31	1		4				1000mg ×1×1					3					1x10	15									1	0	0	0	0	0	0	0	0		1	979797	979797	979797	979797	979797	979797	979797	979797
1	1	1	201	31	1		1	25mg ×3×3								3					1x10	15									1	0	0	0	0	0	0	0	0		1	979797	979797	979797	979797	979797	979797	979797	979797
1	1	1	201	31	1		4				1000mg×1×1					3					1x10	15									1	0	0	0	0	0	0	0	0		1	979797	979797	979797	979797	979797	979797	979797	979797
1	1	1	201	31	1		4				1000mg ×1×1					1	1x20mg	3.5													1	0	0	0	0	0	0	0	0		1	979797	979797	979797	979797	979797	979797	979797	979797
1	1	1	201	31	1		1	25mg ×3×3								1	1x20mg	3.5													1	0	0	0	0	0	0	0	0		1	979797	979797	979797	979797	979797	979797	979797	979797
1	1	1	201	31	1		4				1000mg×1×1					1	1x20mg	3.5													1	0	0	0	0	0	0	0	0		1	979797	979797	979797	979797	979797	979797	979797	979797
1	1	1	201	31	1		4				1000mg ×1×1					2			1x500ml	25											1	0	0	0	0	0	0	0	0		1	979797	979797	979797	979797	979797	979797	979797	979797
1	1	1	201	31	1		1	25mg ×3×3								2			1x500ml	25											1	0	0	0	0	0	0	0	0		1	979797	979797	979797	979797	979797	979797	979797	979797
1	1	1	201	31	1		4				1000mg×1×1					2			1x500ml	25											1	0	0	0	0	0	0	0	0		1	979797	979797	979797	979797	979797	979797	979797	979797
1	1	1	202	27	2		1	25mg×2×2								1	1x20mg	3.5													1	0	0	0	0	0	0	0	0		1	979797	979797	979797	979797	979797	979797	979797	979797
1	1	1	203	39	2		4				1000mg ×1×1					3					1x10	15									1	0	0	0	0	0	0	0	0		1	979797	979797	979797	979797	979797	979797	979797	979797
1	1	1	203	39	2		1	25mg								3					1x10	15									1	0	0	0	0	0	0	0	0		1	979797	979797	979797	979797	979797	979797	979797	979797
1	1	1	203	39	2		4				1000mg ×1×1					1	1x20mg	7													1	0	0	0	0	0	0	0	0		1	979797	979797	979797	979797	979797	979797	979797	979797
1	1	1	203	39	2		1	25mg								1	1x20mg	7													1	0	0	0	0	0	0	0	0		1	979797	979797	979797	979797	979797	979797	979797	979797
1	1	1	204	20	1		4				500mg ×2×7					3					2x10mg	30									1	0	0	0	0	0	0	0	0		1	979797	979797	979797	979797	979797	979797	979797	979797
1	1	1	204	20	1		1	25mg								3					2x10mg	30									1	0	0	0	0	0	0	0	0		1	979797	979797	979797	979797	979797	979797	979797	979797
1	1	1	204	20	1		2		500mlx2x2							3					2x10mg	30									1	0	0	0	0	0	0	0	0		1	979797	979797	979797	979797	979797	979797	979797	979797
1	1	1	204	20	1		4				500mg ×2×7					1	2x25mg	7													1	0	0	0	0	0	0	0	0		1	979797	979797	979797	979797	979797	979797	979797	979797
1	1	1	204	20	1		1	25mg								1	2x25mg	7													1	0	0	0	0	0	0	0	0		1	979797	979797	979797	979797	979797	979797	979797	979797
1	1	1	204	20	1		2		500mlx2x2							1	2x25mg	7													1	0	0	0	0	0	0	0	0		1	979797	979797	979797	979797	979797	979797	979797	979797
1	1	1	204	20	1		4				500mg ×2×7					2			2x500mls	50											1	0	0	0	0	0	0	0	0		1	979797	979797	979797	979797	979797	979797	979797	979797
1	1	1	204	20	1		1	25mg								2			2x500mls	50											1	0	0	0	0	0	0	0	0		1	979797	979797	979797	979797	979797	979797	979797	979797
1	1	1	204	20	1		2		500mlx2x2							2			2x500mls	50											1	0	0	0	0	0	0	0	0		1	979797	979797	979797	979797	979797	979797	979797	979797
1	1	1	205	40	1		1	3x2x25mg								2			1x500mls	25									0	0	1	0	0	0	0	0	0	0	0		1	979797	979797	979797	979797	979797	979797	979797	979797
1	1	1	205	40	1		4				500mg × 1 × 1					2			1x500mls	25									0	0	1	0	0	0	0	0	0	0	0		1	979797	979797	979797	979797	979797	979797	979797	979797
1	1	1	205	40	1		2		500mlsx2x1							2			1x500mls	25									0	0	1	0	0	0	0	0	0	0	0		1	979797	979797	979797	979797	979797	979797	979797	979797
1	1	1	205	40	1		1	3x2x25mg								1	1x25mg	3.5											0	0	1	0	0	0	0	0	0	0	0		1	979797	979797	979797	979797	979797	979797	979797	979797
1	1	1	205	40	1		4				500mg × 1 × 1					1	1x25mg	3.5											0	0	1	0	0	0	0	0	0	0	0		1	979797	979797	979797	979797	979797	979797	979797	979797
1	1	1	205	40	1		2		500mlsx2x1							1	1x25mg	3.5											0	0	1	0	0	0	0	0	0	0	0		1	979797	979797	979797	979797	979797	979797	979797	979797
1	1	1	205	40	1		1	3x2x25mg								3					2x1000mg	15							0	0	1	0	0	0	0	0	0	0	0		1	979797	979797	979797	979797	979797	979797	979797	979797
1	1	1	205	40	1		4				500mg × 1 × 1					3					2x1000mg	15							0	0	1	0	0	0	0	0	0	0	0		1	979797	979797	979797	979797	979797	979797	979797	979797
1	1	1	205	40	1		2		500mlsx2x1							3					2x1000mg	15							0	0	1	0	0	0	0	0	0	0	0		1	979797	979797	979797	979797	979797	979797	979797	979797
1	1	1	206	29	2		2		500mlsx1x1							1	2x25mg	7													1	0	0	0	0	0	0	0	0		1	979797	979797	979797	979797	979797	979797	979797	979797
1	1	1	206	29	2		4				500mg × 2×7					1	2x25mg	7													1	0	0	0	0	0	0	0	0		1	979797	979797	979797	979797	979797	979797	979797	979797
1	1	1	206	29	2		1	1x2x25mg								1	2x25mg	7													1	0	0	0	0	0	0	0	0		1	979797	979797	979797	979797	979797	979797	979797	979797
1	1	1	206	29	2		2		500mlsx1x1							3					2x500mg	20									1	0	0	0	0	0	0	0	0		1	979797	979797	979797	979797	979797	979797	979797	979797
1	1	1	206	29	2		4				500mg × 2×7					3					2x500mg	20									1	0	0	0	0	0	0	0	0		1	979797	979797	979797	979797	979797	979797	979797	979797
1	1	1	206	29	2		1	1x2x25mg								3					2x500mg	20									1	0	0	0	0	0	0	0	0		1	979797	979797	979797	979797	979797	979797	979797	979797
1	1	1	206	29	2		2		500mlsx1x1							2			1x500ml	25											1	0	0	0	0	0	0	0	0		1	979797	979797	979797	979797	979797	979797	979797	979797
1	1	1	206	29	2		4				500mg × 2×7					2			1x500ml	25											1	0	0	0	0	0	0	0	0		1	979797	979797	979797	979797	979797	979797	979797	979797
1	1	1	206	29	2		1	1x2x25mg								2			1x500ml	25											1	0	0	0	0	0	0	0	0		1	979797	979797	979797	979797	979797	979797	979797	979797
1	1	1	207	22	2		1	2x2x25mg								2			2x500mls	50											1	0	0	0	0	0	0	0	0		1	979797	979797	979797	979797	979797	979797	979797	979797
1	1	1	207	22	2		4				500mg × 2×7					2			2x500mls	50											1	0	0	0	0	0	0	0	0		1	979797	979797	979797	979797	979797	979797	979797	979797
1	1	1	207	22	2		2		500mlsx2x2							2			2x500mls	50											1	0	0	0	0	0	0	0	0		1	979797	979797	979797	979797	979797	979797	979797	979797
1	1	1	207	22	2		1	2x2x25mg								3					2x500mg	20									1	0	0	0	0	0	0	0	0		1	979797	979797	979797	979797	979797	979797	979797	979797
1	1	1	207	22	2		4				500mg × 2×7					3					2x500mg	20									1	0	0	0	0	0	0	0	0		1	979797	979797	979797	979797	979797	979797	979797	979797
1	1	1	207	22	2		2		500mlsx2x2							3					2x500mg	20									1	0	0	0	0	0	0	0	0		1	979797	979797	979797	979797	979797	979797	979797	979797
1	1	1	207	22	2		1	2x2x25mg								1	2x25mg	7													1	0	0	0	0	0	0	0	0		1	979797	979797	979797	979797	979797	979797	979797	979797
1	1	1	207	22	2		4				500mg × 2×7					1	2x25mg	7													1	0	0	0	0	0	0	0	0		1	979797	979797	979797	979797	979797	979797	979797	979797
1	1	1	207	22	2		2		500mlsx2x2							1	2x25mg	7													1	0	0	0	0	0	0	0	0		1	979797	979797	979797	979797	979797	979797	979797	979797
1	1	1	208	42	1		2		500mlsx1x1							2			1x500mls	25											1	0	0	0	0	0	0	0	0		1	979797	979797	979797	979797	979797	979797	979797	979797
1	1	1	208	42	1		4				500mg × 1 × 1					2			1x500mls	25											1	0	0	0	0	0	0	0	0		1	979797	979797	979797	979797	979797	979797	979797	979797
1	1	1	208	42	1		1	25mg x2x2								2			1x500mls	25											1	0	0	0	0	0	0	0	0		1	979797	979797	979797	979797	979797	979797	979797	979797
1	1	1	208	42	1		2		500mlsx1x1							3					2x500mg	15									1	0	0	0	0	0	0	0	0		1	979797	979797	979797	979797	979797	979797	979797	979797
1	1	1	208	42	1		4				500mg × 1 × 1					3					2x500mg	15									1	0	0	0	0	0	0	0	0		1	979797	979797	979797	979797	979797	979797	979797	979797
1	1	1	208	42	1		1	25mg x2x2								3					2x500mg	15									1	0	0	0	0	0	0	0	0		1	979797	979797	979797	979797	979797	979797	979797	979797
1	1	1	208	42	1		2		500mlsx1x1							1	3x25mg	10.5													1	0	0	0	0	0	0	0	0		1	979797	979797	979797	979797	979797	979797	979797	979797
1	1	1	208	42	1		4				500mg × 1 × 1					1	3x25mg	10.5													1	0	0	0	0	0	0	0	0		1	979797	979797	979797	979797	979797	979797	979797	979797
1	1	1	208	42	1		1	25mg x2x2								1	3x25mg	10.5													1	0	0	0	0	0	0	0	0		1	979797	979797	979797	979797	979797	979797	979797	979797
1	1	1	209	76	1		2		500mlsx1x1							1	3x25mg	10.5													1	0	0	0	0	0	0	0	0		1	979797	979797	979797	979797	979797	979797	979797	979797
1	1	1	209	76	1		4				500mg × 2×5					1	3x25mg	10.5													1	0	0	0	0	0	0	0	0		1	979797	979797	979797	979797	979797	979797	979797	979797
1	1	1	209	76	1		1	25mgx2x3								1	3x25mg	10.5													1	0	0	0	0	0	0	0	0		1	979797	979797	979797	979797	979797	979797	979797	979797
1	1	1	209	76	1		2		500mlsx1x1							3					2x500mg	30									1	0	0	0	0	0	0	0	0		1	979797	979797	979797	979797	979797	979797	979797	979797
1	1	1	209	76	1		4				500mg × 2×5					3					2x500mg	30									1	0	0	0	0	0	0	0	0		1	979797	979797	979797	979797	979797	979797	979797	979797
1	1	1	209	76	1		1	25mgx2x3								3					2x500mg	30									1	0	0	0	0	0	0	0	0		1	979797	979797	979797	979797	979797	979797	979797	979797
1	1	1	209	76	1		2		500mlsx1x1							2			2x500mg	50											1	0	0	0	0	0	0	0	0		1	979797	979797	979797	979797	979797	979797	979797	979797
1	1	1	209	76	1		4				500mg × 2×5					2			2x500mg	50											1	0	0	0	0	0	0	0	0		1	979797	979797	979797	979797	979797	979797	979797	979797
1	1	1	209	76	1		1	25mgx2x3								2			2x500mg	50											1	0	0	0	0	0	0	0	0		1	979797	979797	979797	979797	979797	979797	979797	979797
1	1	1	210	35	2		1	25mgx2x3								1	3x25mg	10.5													1	0	0	0	0	0	0	0	0		979797	979797	979797	979797	979797	979797	979797	979797	979797
1	1	1	210	35	2		4				500mg × 1×1					1	3x25mg	10.5													1	0	0	0	0	0	0	0	0		979797	979797	979797	979797	979797	979797	979797	979797	979797
1	1	1	210	35	2		2		500mlsx1x1							1	3x25mg	10.5													1	0	0	0	0	0	0	0	0		979797	979797	979797	979797	979797	979797	979797	979797	979797
1	1	1	210	35	2		1	25mgx2x3								3					1x 500mg	15									1	0	0	0	0	0	0	0	0		979797	979797	979797	979797	979797	979797	979797	979797	979797
1	1	1	210	35	2		4				500mg × 1×1					3					1x 500mg	15									1	0	0	0	0	0	0	0	0		979797	979797	979797	979797	979797	979797	979797	979797	979797
1	1	1	210	35	2		2		500mlsx1x1							3					1x 500mg	15									1	0	0	0	0	0	0	0	0		979797	979797	979797	979797	979797	979797	979797	979797	979797
1	1	1	210	35	2		1	25mgx2x3								2			1x500mls	25											1	0	0	0	0	0	0	0	0		979797	979797	979797	979797	979797	979797	979797	979797	979797
1	1	1	210	35	2		4				500mg × 1×1					2			1x500mls	25											1	0	0	0	0	0	0	0	0		979797	979797	979797	979797	979797	979797	979797	979797	979797
1	1	1	210	35	2		2		500mlsx1x1							2			1x500mls	25											1	0	0	0	0	0	0	0	0		979797	979797	979797	979797	979797	979797	979797	979797	979797
1	1	1	301	32	1		1	25×3																							0	0	0	0	0	0	0	0	0		1	1	1	1	1	1	1	1	1
1	1	1	400	50	1		1	25mg x 3								3					1x25	25							0	0	1	1	1	1	2	0	0	0	0		979797	979797	979797	979797	979797	979797	979797	979797	979797
1	1	1	400	50	1		4				500mg x1 x1					3					1x25	25							0	0	1	1	1	1	2	0	0	0	0		979797	979797	979797	979797	979797	979797	979797	979797	979797
1	1	1	400	50	1		6						20mg x 1x 1			3					1x25	25							0	0	1	1	1	1	2	0	0	0	0		979797	979797	979797	979797	979797	979797	979797	979797	979797
1	1	1	400	50	1		1	25mg x 3								1	1×3.50	3.5											0	0	1	1	1	1	2	0	0	0	0		979797	979797	979797	979797	979797	979797	979797	979797	979797
1	1	1	400	50	1		4				500mg x1 x1					1	1×3.50	3.5											0	0	1	1	1	1	2	0	0	0	0		979797	979797	979797	979797	979797	979797	979797	979797	979797
1	1	1	400	50	1		6						20mg x 1x 1			1	1×3.50	3.5											0	0	1	1	1	1	2	0	0	0	0		979797	979797	979797	979797	979797	979797	979797	979797	979797
1	1	1	400	50	1		1	25mg x 3								6											1×2.25	2.25	0	0	1	1	1	1	2	0	0	0	0		979797	979797	979797	979797	979797	979797	979797	979797	979797
1	1	1	400	50	1		4				500mg x1 x1					6											1×2.25	2.25	0	0	1	1	1	1	2	0	0	0	0		979797	979797	979797	979797	979797	979797	979797	979797	979797
1	1	1	400	50	1		6						20mg x 1x 1			6											1×2.25	2.25	0	0	1	1	1	1	2	0	0	0	0		979797	979797	979797	979797	979797	979797	979797	979797	979797
1	1	1	401	43	2		1									6											5×2.25	11.25			1	1	1	0	0	0	0	0	0		979797	979797	979797	979797	979797	979797	979797	979797	979797
1	1	1	401	43	2		6						20mg x1 x 5			6											5×2.25	11.25			1	1	1	0	0	0	0	0	0		979797	979797	979797	979797	979797	979797	979797	979797	979797
1	1	1	401	43	2		1									1															1	1	1	0	0	0	0	0	0		979797	979797	979797	979797	979797	979797	979797	979797	979797
1	1	1	401	43	2		6						20mg x1 x 5			1															1	1	1	0	0	0	0	0	0		979797	979797	979797	979797	979797	979797	979797	979797	979797
1	1	1	402	44	2		4				500mg x1 x1					1	1×3.50	3.5													0	0	0	0	2	1	0	0	0		979797	979797	979797	979797	979797	979797	979797	979797	979797
1	1	1	402	44	2		1	25								1	1×3.50	3.5													0	0	0	0	2	1	0	0	0		979797	979797	979797	979797	979797	979797	979797	979797	979797
1	1	1	402	44	2		4				500mg x1 x1					3					1×25	25									0	0	0	0	2	1	0	0	0		979797	979797	979797	979797	979797	979797	979797	979797	979797
1	1	1	402	44	2		1	25								3					1×25	25									0	0	0	0	2	1	0	0	0		979797	979797	979797	979797	979797	979797	979797	979797	979797
1	1	1	403	23	1		1									3					20×25	250									1	1	1	1	2	1	0	1	0		979797	979797	979797	979797	979797	979797	979797	979797	979797
1	1	1	403	23	1		2									3					20×25	250									1	1	1	1	2	1	0	1	0		979797	979797	979797	979797	979797	979797	979797	979797	979797
1	1	1	403	23	1		4				500 x 2 x 5					3					20×25	250									1	1	1	1	2	1	0	1	0		979797	979797	979797	979797	979797	979797	979797	979797	979797
1	1	1	403	23	1		6						20mg x 2			3					20×25	250									1	1	1	1	2	1	0	1	0		979797	979797	979797	979797	979797	979797	979797	979797	979797
1	1	1	403	23	1		1									1															1	1	1	1	2	1	0	1	0		979797	979797	979797	979797	979797	979797	979797	979797	979797
1	1	1	403	23	1		2									1															1	1	1	1	2	1	0	1	0		979797	979797	979797	979797	979797	979797	979797	979797	979797
1	1	1	403	23	1		4				500 x 2 x 5					1															1	1	1	1	2	1	0	1	0		979797	979797	979797	979797	979797	979797	979797	979797	979797
1	1	1	403	23	1		6						20mg x 2			1															1	1	1	1	2	1	0	1	0		979797	979797	979797	979797	979797	979797	979797	979797	979797
1	1	1	403	23	1		1									6											2×=2.25	4.5			1	1	1	1	2	1	0	1	0		979797	979797	979797	979797	979797	979797	979797	979797	979797
1	1	1	403	23	1		2									6											2×=2.25	4.5			1	1	1	1	2	1	0	1	0		979797	979797	979797	979797	979797	979797	979797	979797	979797
1	1	1	403	23	1		4				500 x 2 x 5					6											2×=2.25	4.5			1	1	1	1	2	1	0	1	0		979797	979797	979797	979797	979797	979797	979797	979797	979797
1	1	1	403	23	1		6						20mg x 2			6											2×=2.25	4.5			1	1	1	1	2	1	0	1	0		979797	979797	979797	979797	979797	979797	979797	979797	979797
1	1	1	403	23	1		1									2															1	1	1	1	2	1	0	1	0		979797	979797	979797	979797	979797	979797	979797	979797	979797
1	1	1	403	23	1		2									2															1	1	1	1	2	1	0	1	0		979797	979797	979797	979797	979797	979797	979797	979797	979797
1	1	1	403	23	1		4				500 x 2 x 5					2															1	1	1	1	2	1	0	1	0		979797	979797	979797	979797	979797	979797	979797	979797	979797
1	1	1	403	23	1		6						20mg x 2			2															1	1	1	1	2	1	0	1	0		979797	979797	979797	979797	979797	979797	979797	979797	979797
1	1	1	404	40	2		2									2															1	1	1	1	2	0	0	0	0		979797	979797	979797	979797	979797	979797	979797	979797	979797
1	1	1	404	40	2		1									2															1	1	1	1	2	0	0	0	0		979797	979797	979797	979797	979797	979797	979797	979797	979797
1	1	1	404	40	2		4				500mg x 2 x 7					2															1	1	1	1	2	0	0	0	0		979797	979797	979797	979797	979797	979797	979797	979797	979797
1	1	1	404	40	2		6						20mg x1			2															1	1	1	1	2	0	0	0	0		979797	979797	979797	979797	979797	979797	979797	979797	979797
1	1	1	404	40	2		2									1															1	1	1	1	2	0	0	0	0		979797	979797	979797	979797	979797	979797	979797	979797	979797
1	1	1	404	40	2		1									1															1	1	1	1	2	0	0	0	0		979797	979797	979797	979797	979797	979797	979797	979797	979797
1	1	1	404	40	2		4				500mg x 2 x 7					1															1	1	1	1	2	0	0	0	0		979797	979797	979797	979797	979797	979797	979797	979797	979797
1	1	1	404	40	2		6						20mg x1			1															1	1	1	1	2	0	0	0	0		979797	979797	979797	979797	979797	979797	979797	979797	979797
1	1	1	404	40	2		2									6											1×2.25	2.25			1	1	1	1	2	0	0	0	0		979797	979797	979797	979797	979797	979797	979797	979797	979797
1	1	1	404	40	2		1									6											1×2.25	2.25			1	1	1	1	2	0	0	0	0		979797	979797	979797	979797	979797	979797	979797	979797	979797
1	1	1	404	40	2		4				500mg x 2 x 7					6											1×2.25	2.25			1	1	1	1	2	0	0	0	0		979797	979797	979797	979797	979797	979797	979797	979797	979797
1	1	1	404	40	2		6						20mg x1			6											1×2.25	2.25			1	1	1	1	2	0	0	0	0		979797	979797	979797	979797	979797	979797	979797	979797	979797
1	1	1	404	40	2		2									3					14×25	350									1	1	1	1	2	0	0	0	0		979797	979797	979797	979797	979797	979797	979797	979797	979797
1	1	1	404	40	2		1									3					14×25	350									1	1	1	1	2	0	0	0	0		979797	979797	979797	979797	979797	979797	979797	979797	979797
1	1	1	404	40	2		4				500mg x 2 x 7					3					14×25	350									1	1	1	1	2	0	0	0	0		979797	979797	979797	979797	979797	979797	979797	979797	979797
1	1	1	404	40	2		6						20mg x1			3					14×25	350									1	1	1	1	2	0	0	0	0		979797	979797	979797	979797	979797	979797	979797	979797	979797
1	1	1	405	36	1		1									3					1x27	27									1	1	1	1	1	1	0	0	0		979797	979797	979797	979797	979797	979797	979797	979797	979797
1	1	1	405	36	1		4				500mg x1 x1					3					1x27	27									1	1	1	1	1	1	0	0	0		979797	979797	979797	979797	979797	979797	979797	979797	979797
1	1	1	405	36	1		2									3					1x27	27									1	1	1	1	1	1	0	0	0		979797	979797	979797	979797	979797	979797	979797	979797	979797
1	1	1	406	26	2		2							0	0	3					1x27	27									1	1	1	1	2	1	0	0	0		979797	979797	979797	979797	979797	979797	979797	979797	979797
1	1	1	406	26	2		1							0	0	3					1x27	27									1	1	1	1	2	1	0	0	0		979797	979797	979797	979797	979797	979797	979797	979797	979797
1	1	1	406	26	2		4				500mg x1 x1			0	0	3					1x27	27									1	1	1	1	2	1	0	0	0		979797	979797	979797	979797	979797	979797	979797	979797	979797
1	1	1	407	48	2		1																								1	1	1	0	2	0	0	0	0		979797	979797	979797	979797	979797	979797	979797	979797	979797
1	1	1	407	48	2																										1	1	1	0	2	0	0	0	0		979797	979797	979797	979797	979797	979797	979797	979797	979797
1	1	1	408	26	2		6						30 mg x1 x2			6											2x2.25	4.5			1	1	1	1	2	1	0	0	0		979797	979797	979797	979797	979797	979797	979797	979797	979797
1	1	1	408	26	2		4				500mg x2 x7					6											2x2.25	4.5			1	1	1	1	2	1	0	0	0		979797	979797	979797	979797	979797	979797	979797	979797	979797
1	1	1	408	26	2		2									6											2x2.25	4.5			1	1	1	1	2	1	0	0	0		979797	979797	979797	979797	979797	979797	979797	979797	979797
1	1	1	408	26	2		1									6											2x2.25	4.5			1	1	1	1	2	1	0	0	0		979797	979797	979797	979797	979797	979797	979797	979797	979797
1	1	1	408	26	2		6						30 mg x1 x2			3					14x25	350									1	1	1	1	2	1	0	0	0		979797	979797	979797	979797	979797	979797	979797	979797	979797
1	1	1	408	26	2		4				500mg x2 x7					3					14x25	350									1	1	1	1	2	1	0	0	0		979797	979797	979797	979797	979797	979797	979797	979797	979797
1	1	1	408	26	2		2									3					14x25	350									1	1	1	1	2	1	0	0	0		979797	979797	979797	979797	979797	979797	979797	979797	979797
1	1	1	408	26	2		1									3					14x25	350									1	1	1	1	2	1	0	0	0		979797	979797	979797	979797	979797	979797	979797	979797	979797
1	1	1	409	37	1		4				500mg x1 x1					3					1x25	25									1	1	1	1	2	1	0	0	0		979797	979797	979797	979797	979797	979797	979797	979797	979797
1	1	1	409	37	1		1									3					1x25	25									1	1	1	1	2	1	0	0	0		979797	979797	979797	979797	979797	979797	979797	979797	979797
1	1	1	409	37	1		2									3					1x25	25									1	1	1	1	2	1	0	0	0		979797	979797	979797	979797	979797	979797	979797	979797	979797
1	1	1	410	20	2		4				500mg x 1 x1					3					1x25	25									1	1	1	1	2	1	0	0	0		979797	979797	979797	979797	979797	979797	979797	979797	979797
1	1	1	411	32	2		6						20mg x1 x5			6											5x2.25	11.25			1	1	1	1	2	1	0	0	0		979797	979797	979797	979797	979797	979797	979797	979797	979797
1	1	1	411	32	2		1									6											5x2.25	11.25			1	1	1	1	2	1	0	0	0		979797	979797	979797	979797	979797	979797	979797	979797	979797
1	1	1	412	24	1		1									3					1x1.50	1.5									1	1	1	1	2	1	0	0	0		979797	979797	979797	979797	979797	979797	979797	979797	979797
1	1	1	412	24	1		4				500mg x1 x1					3					1x1.50	1.5									1	1	1	1	2	1	0	0	0		979797	979797	979797	979797	979797	979797	979797	979797	979797
1	1	1	413	19	2		2																								1	1	1	1	2	1	0	0	0		979797	979797	979797	979797	979797	979797	979797	979797	979797
1	1	1	413	19	2		1																								1	1	1	1	2	1	0	0	0		979797	979797	979797	979797	979797	979797	979797	979797	979797
1	1	1	414	25	2		4				500mg x 2 x 5					3					10x1.50	15									1	1	1	1	2	1	0	1			979797	979797	979797	979797	979797	979797	979797	979797	979797
1	1	1	414	25	2		2									3					10x1.50	15									1	1	1	1	2	1	0	1			979797	979797	979797	979797	979797	979797	979797	979797	979797
1	1	1	414	25	2		1									3					10x1.50	15									1	1	1	1	2	1	0	1			979797	979797	979797	979797	979797	979797	979797	979797	979797
1	1	1	415	4	1									Erythromicine	250mg x1x3x1	5									1x3	36					1	1	1	1	2	1	0	1	0		979797	979797	979797	979797	979797	979797	979797	979797	979797
1	1	1	415	4	1		1							Erythromicine	250mg x1x3x1	5									1x3	36					1	1	1	1	2	1	0	1	0		979797	979797	979797	979797	979797	979797	979797	979797	979797
1	1	1	415	4	1		2							Erythromicine	250mg x1x3x1	5									1x3	36					1	1	1	1	2	1	0	1	0		979797	979797	979797	979797	979797	979797	979797	979797	979797
1	1	1	416	1	1		6						100mlsx1 x 3x5			6											1x22.50	22.5			1	1	1	1	2	1	0	0	0		979797	979797	979797	979797	979797	979797	979797	979797	979797
1	1	1	416	1	1		1									6											1x22.50	22.5			1	1	1	1	2	1	0	0	0		979797	979797	979797	979797	979797	979797	979797	979797	979797
1	1	1	417	1	2		1							Calpol	5mls x1 x 3	6											1x22.50	22.5			1	1	1	1	2	1	0	0	0		979797	979797	979797	979797	979797	979797	979797	979797	979797
1	1	1	417	1	2		6						29 mg x 1 x 14	Calpol	5mls x1 x 3	6											1x22.50	22.5			1	1	1	1	2	1	0	0	0		979797	979797	979797	979797	979797	979797	979797	979797	979797
1	1	1	417	1	2		1							Erythromycin	125mg x 1 x 7	6											1x22.50	22.5			1	1	1	1	2	1	0	0	0		979797	979797	979797	979797	979797	979797	979797	979797	979797
1	1	1	417	1	2		6						29 mg x 1 x 14	Erythromycin	125mg x 1 x 7	6											1x22.50	22.5			1	1	1	1	2	1	0	0	0		979797	979797	979797	979797	979797	979797	979797	979797	979797
1	1	1	417	1	2		1							Calpol	5mls x1 x 3	5									1x36	36					1	1	1	1	2	1	0	0	0		979797	979797	979797	979797	979797	979797	979797	979797	979797
1	1	1	417	1	2		6						29 mg x 1 x 14	Calpol	5mls x1 x 3	5									1x36	36					1	1	1	1	2	1	0	0	0		979797	979797	979797	979797	979797	979797	979797	979797	979797
1	1	1	417	1	2		1							Erythromycin	125mg x 1 x 7	5									1x36	36					1	1	1	1	2	1	0	0	0		979797	979797	979797	979797	979797	979797	979797	979797	979797
1	1	1	417	1	2		6						29 mg x 1 x 14	Erythromycin	125mg x 1 x 7	5									1x36	36					1	1	1	1	2	1	0	0	0		979797	979797	979797	979797	979797	979797	979797	979797	979797
1	1	1	418	3	2		1							Erythromycin	250mg	5									2×12	24					1	1	1	1	2	1	0	0	0		979797	979797	979797	979797	979797	979797	979797	979797	979797
1	1	1	418	3	2		2							Erythromycin	250mg	5									2×12	24					1	1	1	1	2	1	0	0	0		979797	979797	979797	979797	979797	979797	979797	979797	979797
1	1	1	418	3	2									Erythromycin	250mg	5									2×12	24					1	1	1	1	2	1	0	0	0		979797	979797	979797	979797	979797	979797	979797	979797	979797
1	1	1	419	4	2		1							Erythromycin	125mg x 4 x 3	5									12×12	144			0	0	1	1	1	1	2	1	0	0	0		979797	979797	979797	979797	979797	979797	979797	979797	979797
1	1	1	420	11	2		6						20mgx 1 x 5	Erythromycin	250mg x1 x5	6											5×2.25	11.25			1	1	1	1	2	1	0	0	0		979797	979797	979797	979797	979797	979797	979797	979797	979797
1	1	1	420	11	2		1							Erythromycin	250mg x1 x5	6											5×2.25	11.25			1	1	1	1	2	1	0	0	0		979797	979797	979797	979797	979797	979797	979797	979797	979797
1	1	1	420	11	2		2		300ml x 3					Erythromycin	250mg x1 x5	6											5×2.25	11.25			1	1	1	1	2	1	0	0	0		979797	979797	979797	979797	979797	979797	979797	979797	979797
1	1	1	420	11	2		4							Erythromycin	250mg x1 x5	6											5×2.25	11.25			1	1	1	1	2	1	0	0	0		979797	979797	979797	979797	979797	979797	979797	979797	979797
1	1	1	420	11	2		6						20mgx 1 x 5	0	0	6											5×2.25	11.25			1	1	1	1	2	1	0	0	0		979797	979797	979797	979797	979797	979797	979797	979797	979797
1	1	1	420	11	2		1							0	0	6											5×2.25	11.25			1	1	1	1	2	1	0	0	0		979797	979797	979797	979797	979797	979797	979797	979797	979797
1	1	1	420	11	2		2		300ml x 3					0	0	6											5×2.25	11.25			1	1	1	1	2	1	0	0	0		979797	979797	979797	979797	979797	979797	979797	979797	979797
1	1	1	420	11	2		4							0	0	6											5×2.25	11.25			1	1	1	1	2	1	0	0	0		979797	979797	979797	979797	979797	979797	979797	979797	979797
1	1	1	420	11	2		6						20mgx 1 x 5	Erythromycin	250mg x1 x5	5									5×12	60					1	1	1	1	2	1	0	0	0		979797	979797	979797	979797	979797	979797	979797	979797	979797
1	1	1	420	11	2		1							Erythromycin	250mg x1 x5	5									5×12	60					1	1	1	1	2	1	0	0	0		979797	979797	979797	979797	979797	979797	979797	979797	979797
1	1	1	420	11	2		2		300ml x 3					Erythromycin	250mg x1 x5	5									5×12	60					1	1	1	1	2	1	0	0	0		979797	979797	979797	979797	979797	979797	979797	979797	979797
1	1	1	420	11	2		4							Erythromycin	250mg x1 x5	5									5×12	60					1	1	1	1	2	1	0	0	0		979797	979797	979797	979797	979797	979797	979797	979797	979797
1	1	1	420	11	2		6						20mgx 1 x 5	0	0	5									5×12	60					1	1	1	1	2	1	0	0	0		979797	979797	979797	979797	979797	979797	979797	979797	979797
1	1	1	420	11	2		1							0	0	5									5×12	60					1	1	1	1	2	1	0	0	0		979797	979797	979797	979797	979797	979797	979797	979797	979797
1	1	1	420	11	2		2		300ml x 3					0	0	5									5×12	60					1	1	1	1	2	1	0	0	0		979797	979797	979797	979797	979797	979797	979797	979797	979797
1	1	1	420	11	2		4							0	0	5									5×12	60					1	1	1	1	2	1	0	0	0		979797	979797	979797	979797	979797	979797	979797	979797	979797
1	1	1	2011	42	1		2		500mlsx1x1							2			1x500mls	25											1	0	0	0	0	0	0	0	0		979797	979797	979797	979797	979797	979797	979797	979797	979797
1	1	1	2011	42	1		4				500mg × 1×1					2			1x500mls	25											1	0	0	0	0	0	0	0	0		979797	979797	979797	979797	979797	979797	979797	979797	979797
1	1	1	2011	42	1		1	25mgx2x3								2			1x500mls	25											1	0	0	0	0	0	0	0	0		979797	979797	979797	979797	979797	979797	979797	979797	979797
1	1	1	2011	42	1		2		500mlsx1x1							3					1x500mg	15									1	0	0	0	0	0	0	0	0		979797	979797	979797	979797	979797	979797	979797	979797	979797
1	1	1	2011	42	1		4				500mg × 1×1					3					1x500mg	15									1	0	0	0	0	0	0	0	0		979797	979797	979797	979797	979797	979797	979797	979797	979797
1	1	1	2011	42	1		1	25mgx2x3								3					1x500mg	15									1	0	0	0	0	0	0	0	0		979797	979797	979797	979797	979797	979797	979797	979797	979797
1	1	1	2011	42	1		2		500mlsx1x1							1	3x25mg	10.5													1	0	0	0	0	0	0	0	0		979797	979797	979797	979797	979797	979797	979797	979797	979797
1	1	1	2011	42	1		4				500mg × 1×1					1	3x25mg	10.5													1	0	0	0	0	0	0	0	0		979797	979797	979797	979797	979797	979797	979797	979797	979797
1	1	1	2011	42	1		1	25mgx2x3								1	3x25mg	10.5													1	0	0	0	0	0	0	0	0		979797	979797	979797	979797	979797	979797	979797	979797	979797
1	1	1	2012	21	2		2		500mlsx1x1							1	25mg x3	10.5													1	0	0	0	0	0	0	0	0		1	979797	979797	979797	979797	979797	979797	979797	979797
1	1	1	2012	21	2		4				500mg x2x1x1					1	25mg x3	10.5													1	0	0	0	0	0	0	0	0		1	979797	979797	979797	979797	979797	979797	979797	979797
1	1	1	2012	21	2		1	25mgx3x3								1	25mg x3	10.5													1	0	0	0	0	0	0	0	0		1	979797	979797	979797	979797	979797	979797	979797	979797
1	1	1	2012	21	2		2		500mlsx1x1							2			500mlsx1x1	25											1	0	0	0	0	0	0	0	0		1	979797	979797	979797	979797	979797	979797	979797	979797
1	1	1	2012	21	2		4				500mg x2x1x1					2			500mlsx1x1	25											1	0	0	0	0	0	0	0	0		1	979797	979797	979797	979797	979797	979797	979797	979797
1	1	1	2012	21	2		1	25mgx3x3								2			500mlsx1x1	25											1	0	0	0	0	0	0	0	0		1	979797	979797	979797	979797	979797	979797	979797	979797
1	1	1	2012	21	2		2		500mlsx1x1							3					1x500mg	15									1	0	0	0	0	0	0	0	0		1	979797	979797	979797	979797	979797	979797	979797	979797
1	1	1	2012	21	2		4				500mg x2x1x1					3					1x500mg	15									1	0	0	0	0	0	0	0	0		1	979797	979797	979797	979797	979797	979797	979797	979797
1	1	1	2012	21	2		1	25mgx3x3								3					1x500mg	15									1	0	0	0	0	0	0	0	0		1	979797	979797	979797	979797	979797	979797	979797	979797
1	1	1	5040-102-23451-1	29	1	50	1	200ml x 2 times/day																							2000	200	100	144	133	133	133	1333	1333		4	3	2	2	2	2	2	3	4
1	1	1	5040-102-23451-1	29	1	50	1	200ml x 2 times/day																							2000	200	100	144	133	133	133	1333	1333		4	3	2	2	2	2	2	3	4
2	1	1	101	2	1		2		1.5lx1							3					3×1.50	6									1	1									979797	979797	979797	979797	979797	979797	979797	979797	979797
2	1	1	101	2	1		4				120mgx1x1					3					3×1.50	6									1	1									979797	979797	979797	979797	979797	979797	979797	979797	979797
2	1	1	101	2	1		1									3					3×1.50	6									1	1									979797	979797	979797	979797	979797	979797	979797	979797	979797
2	1	1	101	2	1		6						20gx1x1			3					3×1.50	6									1	1									979797	979797	979797	979797	979797	979797	979797	979797	979797
2	1	1	101	2	1		2		1.5lx1							1															1	1									979797	979797	979797	979797	979797	979797	979797	979797	979797
2	1	1	101	2	1		4				120mgx1x1					1															1	1									979797	979797	979797	979797	979797	979797	979797	979797	979797
2	1	1	101	2	1		1									1															1	1									979797	979797	979797	979797	979797	979797	979797	979797	979797
2	1	1	101	2	1		6						20gx1x1			1															1	1									979797	979797	979797	979797	979797	979797	979797	979797	979797
2	1	1	101	2	1		2		1.5lx1							6											1x2×25				1	1									979797	979797	979797	979797	979797	979797	979797	979797	979797
2	1	1	101	2	1		4				120mgx1x1					6											1x2×25				1	1									979797	979797	979797	979797	979797	979797	979797	979797	979797
2	1	1	101	2	1		1									6											1x2×25				1	1									979797	979797	979797	979797	979797	979797	979797	979797	979797
2	1	1	101	2	1		6						20gx1x1			6											1x2×25				1	1									979797	979797	979797	979797	979797	979797	979797	979797	979797
2	1	1	101	2	1		2		1.5lx1							2			3×25	75											1	1									979797	979797	979797	979797	979797	979797	979797	979797	979797
2	1	1	101	2	1		4				120mgx1x1					2			3×25	75											1	1									979797	979797	979797	979797	979797	979797	979797	979797	979797
2	1	1	101	2	1		1									2			3×25	75											1	1									979797	979797	979797	979797	979797	979797	979797	979797	979797
2	1	1	101	2	1		6						20gx1x1			2			3×25	75											1	1									979797	979797	979797	979797	979797	979797	979797	979797	979797
2	1	1	102	42	2		1									1															1	1									979797	979797	979797	979797	979797	979797	979797	979797	979797
2	1	1	102	42	2		4				500mgx1x1x3					1															1	1									979797	979797	979797	979797	979797	979797	979797	979797	979797
2	1	1	102	42	2		1									3															1	1									979797	979797	979797	979797	979797	979797	979797	979797	979797
2	1	1	102	42	2		4				500mgx1x1x3					3															1	1									979797	979797	979797	979797	979797	979797	979797	979797	979797
2	1	1	103	5	1		4									1															1	1									979797	979797	979797	979797	979797	979797	979797	979797	979797
2	1	1	103	5	1		1									1															1	1									979797	979797	979797	979797	979797	979797	979797	979797	979797
2	1	1	103	5	1		2									1															1	1									979797	979797	979797	979797	979797	979797	979797	979797	979797
2	1	1	103	5	1		4									3															1	1									979797	979797	979797	979797	979797	979797	979797	979797	979797
2	1	1	103	5	1		1									3															1	1									979797	979797	979797	979797	979797	979797	979797	979797	979797
2	1	1	103	5	1		2									3															1	1									979797	979797	979797	979797	979797	979797	979797	979797	979797
2	1	1	103	5	1		4									2															1	1									979797	979797	979797	979797	979797	979797	979797	979797	979797
2	1	1	103	5	1		1									2															1	1									979797	979797	979797	979797	979797	979797	979797	979797	979797
2	1	1	103	5	1		2									2															1	1									979797	979797	979797	979797	979797	979797	979797	979797	979797
2	1	1	104	4	1		1																								1	1									979797	979797	979797	979797	979797	979797	979797	979797	979797
2	1	1	104	4	1		6																								1	1									979797	979797	979797	979797	979797	979797	979797	979797	979797
2	1	1	104	4	1		5					250mg																			1	1									979797	979797	979797	979797	979797	979797	979797	979797	979797
2	1	1	104	4	1		4				250mgx1x3x3																				1	1									979797	979797	979797	979797	979797	979797	979797	979797	979797
2	1	1	104	4	1		1									4															1	1									979797	979797	979797	979797	979797	979797	979797	979797	979797
2	1	1	104	4	1		6									4															1	1									979797	979797	979797	979797	979797	979797	979797	979797	979797
2	1	1	104	4	1		5					250mg				4															1	1									979797	979797	979797	979797	979797	979797	979797	979797	979797
2	1	1	104	4	1		4				250mgx1x3x3					4															1	1									979797	979797	979797	979797	979797	979797	979797	979797	979797
2	1	1	104	4	1		1									6															1	1									979797	979797	979797	979797	979797	979797	979797	979797	979797
2	1	1	104	4	1		6									6															1	1									979797	979797	979797	979797	979797	979797	979797	979797	979797
2	1	1	104	4	1		5					250mg				6															1	1									979797	979797	979797	979797	979797	979797	979797	979797	979797
2	1	1	104	4	1		4				250mgx1x3x3					6															1	1									979797	979797	979797	979797	979797	979797	979797	979797	979797
2	1	1	104	4	1		1									1															1	1									979797	979797	979797	979797	979797	979797	979797	979797	979797
2	1	1	104	4	1		6									1															1	1									979797	979797	979797	979797	979797	979797	979797	979797	979797
2	1	1	104	4	1		5					250mg				1															1	1									979797	979797	979797	979797	979797	979797	979797	979797	979797
2	1	1	104	4	1		4				250mgx1x3x3					1															1	1									979797	979797	979797	979797	979797	979797	979797	979797	979797
2	1	1	104	4	1		1									5									1×12	12					1	1									979797	979797	979797	979797	979797	979797	979797	979797	979797
2	1	1	104	4	1		6									5									1×12	12					1	1									979797	979797	979797	979797	979797	979797	979797	979797	979797
2	1	1	104	4	1		5					250mg				5									1×12	12					1	1									979797	979797	979797	979797	979797	979797	979797	979797	979797
2	1	1	104	4	1		4				250mgx1x3x3					5									1×12	12					1	1									979797	979797	979797	979797	979797	979797	979797	979797	979797
2	1	1	104	4	1		1									3															1	1									979797	979797	979797	979797	979797	979797	979797	979797	979797
2	1	1	104	4	1		6									3															1	1									979797	979797	979797	979797	979797	979797	979797	979797	979797
2	1	1	104	4	1		5					250mg				3															1	1									979797	979797	979797	979797	979797	979797	979797	979797	979797
2	1	1	104	4	1		4				250mgx1x3x3					3															1	1									979797	979797	979797	979797	979797	979797	979797	979797	979797
2	1	1	105	2	1		1									5															1	1									979797	979797	979797	979797	979797	979797	979797	979797	979797
2	1	1	105	2	1		5									5															1	1									979797	979797	979797	979797	979797	979797	979797	979797	979797
2	1	1	105	2	1		6									5															1	1									979797	979797	979797	979797	979797	979797	979797	979797	979797
2	1	1	105	2	1		2									5															1	1									979797	979797	979797	979797	979797	979797	979797	979797	979797
2	1	1	105	2	1		1									1															1	1									979797	979797	979797	979797	979797	979797	979797	979797	979797
2	1	1	105	2	1		5									1															1	1									979797	979797	979797	979797	979797	979797	979797	979797	979797
2	1	1	105	2	1		6									1															1	1									979797	979797	979797	979797	979797	979797	979797	979797	979797
2	1	1	105	2	1		2									1															1	1									979797	979797	979797	979797	979797	979797	979797	979797	979797
2	1	1	105	2	1		1									2															1	1									979797	979797	979797	979797	979797	979797	979797	979797	979797
2	1	1	105	2	1		5									2															1	1									979797	979797	979797	979797	979797	979797	979797	979797	979797
2	1	1	105	2	1		6									2															1	1									979797	979797	979797	979797	979797	979797	979797	979797	979797
2	1	1	105	2	1		2									2															1	1									979797	979797	979797	979797	979797	979797	979797	979797	979797
2	1	1	105	2	1		1									6															1	1									979797	979797	979797	979797	979797	979797	979797	979797	979797
2	1	1	105	2	1		5									6															1	1									979797	979797	979797	979797	979797	979797	979797	979797	979797
2	1	1	105	2	1		6									6															1	1									979797	979797	979797	979797	979797	979797	979797	979797	979797
2	1	1	105	2	1		2									6															1	1									979797	979797	979797	979797	979797	979797	979797	979797	979797
2	1	1	106	2	2		6									1															1	1									979797	979797	979797	979797	979797	979797	979797	979797	979797
2	1	1	106	2	2		1									1															1	1									979797	979797	979797	979797	979797	979797	979797	979797	979797
2	1	1	106	2	2		2									1															1	1									979797	979797	979797	979797	979797	979797	979797	979797	979797
2	1	1	106	2	2		5									1															1	1									979797	979797	979797	979797	979797	979797	979797	979797	979797
2	1	1	106	2	2		6									5															1	1									979797	979797	979797	979797	979797	979797	979797	979797	979797
2	1	1	106	2	2		1									5															1	1									979797	979797	979797	979797	979797	979797	979797	979797	979797
2	1	1	106	2	2		2									5															1	1									979797	979797	979797	979797	979797	979797	979797	979797	979797
2	1	1	106	2	2		5									5															1	1									979797	979797	979797	979797	979797	979797	979797	979797	979797
2	1	1	106	2	2		6									6															1	1									979797	979797	979797	979797	979797	979797	979797	979797	979797
2	1	1	106	2	2		1									6															1	1									979797	979797	979797	979797	979797	979797	979797	979797	979797
2	1	1	106	2	2		2									6															1	1									979797	979797	979797	979797	979797	979797	979797	979797	979797
2	1	1	106	2	2		5									6															1	1									979797	979797	979797	979797	979797	979797	979797	979797	979797
2	1	1	106	2	2		6									2															1	1									979797	979797	979797	979797	979797	979797	979797	979797	979797
2	1	1	106	2	2		1									2															1	1									979797	979797	979797	979797	979797	979797	979797	979797	979797
2	1	1	106	2	2		2									2															1	1									979797	979797	979797	979797	979797	979797	979797	979797	979797
2	1	1	106	2	2		5									2															1	1									979797	979797	979797	979797	979797	979797	979797	979797	979797
2	1	1	107	42	1		2									1															1	1									979797	979797	979797	979797	979797	979797	979797	979797	979797
2	1	1	107	42	1		1									1															1	1									979797	979797	979797	979797	979797	979797	979797	979797	979797
2	1	1	107	42	1		4									1															1	1									979797	979797	979797	979797	979797	979797	979797	979797	979797
2	1	1	107	42	1		2									3															1	1									979797	979797	979797	979797	979797	979797	979797	979797	979797
2	1	1	107	42	1		1									3															1	1									979797	979797	979797	979797	979797	979797	979797	979797	979797
2	1	1	107	42	1		4									3															1	1									979797	979797	979797	979797	979797	979797	979797	979797	979797
2	1	1	107	42	1		2									2															1	1									979797	979797	979797	979797	979797	979797	979797	979797	979797
2	1	1	107	42	1		1									2															1	1									979797	979797	979797	979797	979797	979797	979797	979797	979797
2	1	1	107	42	1		4									2															1	1									979797	979797	979797	979797	979797	979797	979797	979797	979797
2	1	1	108	26	2		2									3													0	0	1	1									979797	979797	979797	979797	979797	979797	979797	979797	979797
2	1	1	108	26	2		4									3													0	0	1	1									979797	979797	979797	979797	979797	979797	979797	979797	979797
2	1	1	108	26	2		1									3													0	0	1	1									979797	979797	979797	979797	979797	979797	979797	979797	979797
2	1	1	108	26	2		6									3													0	0	1	1									979797	979797	979797	979797	979797	979797	979797	979797	979797
2	1	1	108	26	2		2									2													0	0	1	1									979797	979797	979797	979797	979797	979797	979797	979797	979797
2	1	1	108	26	2		4									2													0	0	1	1									979797	979797	979797	979797	979797	979797	979797	979797	979797
2	1	1	108	26	2		1									2													0	0	1	1									979797	979797	979797	979797	979797	979797	979797	979797	979797
2	1	1	108	26	2		6									2													0	0	1	1									979797	979797	979797	979797	979797	979797	979797	979797	979797
2	1	1	108	26	2		2									6													0	0	1	1									979797	979797	979797	979797	979797	979797	979797	979797	979797
2	1	1	108	26	2		4									6													0	0	1	1									979797	979797	979797	979797	979797	979797	979797	979797	979797
2	1	1	108	26	2		1									6													0	0	1	1									979797	979797	979797	979797	979797	979797	979797	979797	979797
2	1	1	108	26	2		6									6													0	0	1	1									979797	979797	979797	979797	979797	979797	979797	979797	979797
2	1	1	108	26	2		2									1													0	0	1	1									979797	979797	979797	979797	979797	979797	979797	979797	979797
2	1	1	108	26	2		4									1													0	0	1	1									979797	979797	979797	979797	979797	979797	979797	979797	979797
2	1	1	108	26	2		1									1													0	0	1	1									979797	979797	979797	979797	979797	979797	979797	979797	979797
2	1	1	108	26	2		6									1													0	0	1	1									979797	979797	979797	979797	979797	979797	979797	979797	979797
2	1	1	109	32	1		1									2			4×25	100											1	1									979797	979797	979797	979797	979797	979797	979797	979797	979797
2	1	1	109	32	1		2		2 litresx2x1							2			4×25	100											1	1									979797	979797	979797	979797	979797	979797	979797	979797	979797
2	1	1	109	32	1		4									2			4×25	100											1	1									979797	979797	979797	979797	979797	979797	979797	979797	979797
2	1	1	109	32	1		1									3															1	1									979797	979797	979797	979797	979797	979797	979797	979797	979797
2	1	1	109	32	1		2		2 litresx2x1							3															1	1									979797	979797	979797	979797	979797	979797	979797	979797	979797
2	1	1	109	32	1		4									3															1	1									979797	979797	979797	979797	979797	979797	979797	979797	979797
2	1	1	109	32	1		1									1															1	1									979797	979797	979797	979797	979797	979797	979797	979797	979797
2	1	1	109	32	1		2		2 litresx2x1							1															1	1									979797	979797	979797	979797	979797	979797	979797	979797	979797
2	1	1	109	32	1		4									1															1	1									979797	979797	979797	979797	979797	979797	979797	979797	979797
2	1	1	110	33	2		4									1															1	1									979797	979797	979797	979797	979797	979797	979797	979797	979797
2	1	1	110	33	2		2									1															1	1									979797	979797	979797	979797	979797	979797	979797	979797	979797
2	1	1	110	33	2		1									1															1	1									979797	979797	979797	979797	979797	979797	979797	979797	979797
2	1	1	110	33	2		4									2															1	1									979797	979797	979797	979797	979797	979797	979797	979797	979797
2	1	1	110	33	2		2									2															1	1									979797	979797	979797	979797	979797	979797	979797	979797	979797
2	1	1	110	33	2		1									2															1	1									979797	979797	979797	979797	979797	979797	979797	979797	979797
2	1	1	110	33	2		4									3															1	1									979797	979797	979797	979797	979797	979797	979797	979797	979797
2	1	1	110	33	2		2									3															1	1									979797	979797	979797	979797	979797	979797	979797	979797	979797
2	1	1	110	33	2		1									3															1	1									979797	979797	979797	979797	979797	979797	979797	979797	979797
2	1	1	111	10	1		2									3															1	1									979797	979797	979797	979797	979797	979797	979797	979797	979797
2	1	1	111	10	1		4									3															1	1									979797	979797	979797	979797	979797	979797	979797	979797	979797
2	1	1	111	10	1		1									3															1	1									979797	979797	979797	979797	979797	979797	979797	979797	979797
2	1	1	111	10	1		2									2															1	1									979797	979797	979797	979797	979797	979797	979797	979797	979797
2	1	1	111	10	1		4									2															1	1									979797	979797	979797	979797	979797	979797	979797	979797	979797
2	1	1	111	10	1		1									2															1	1									979797	979797	979797	979797	979797	979797	979797	979797	979797
2	1	1	111	10	1		2									1															1	1									979797	979797	979797	979797	979797	979797	979797	979797	979797
2	1	1	111	10	1		4									1															1	1									979797	979797	979797	979797	979797	979797	979797	979797	979797
2	1	1	111	10	1		1									1															1	1									979797	979797	979797	979797	979797	979797	979797	979797	979797
2	1	1	201	16	2		1	1x1x25mg						0	0	2			1x500mls	25											1	0	0	0	0	0	0	0	0	0	1	979797	979797	979797	979797	979797	979797	979797	979797
2	1	1	201	16	2		4				500mg x2x3x2			0	0	2			1x500mls	25											1	0	0	0	0	0	0	0	0	0	1	979797	979797	979797	979797	979797	979797	979797	979797
2	1	1	201	16	2		2		500mlsx1x1					0	0	2			1x500mls	25											1	0	0	0	0	0	0	0	0	0	1	979797	979797	979797	979797	979797	979797	979797	979797
2	1	1	201	16	2		1	1x1x25mg						0	0	3					2x500mg	30									1	0	0	0	0	0	0	0	0	0	1	979797	979797	979797	979797	979797	979797	979797	979797
2	1	1	201	16	2		4				500mg x2x3x2			0	0	3					2x500mg	30									1	0	0	0	0	0	0	0	0	0	1	979797	979797	979797	979797	979797	979797	979797	979797
2	1	1	201	16	2		2		500mlsx1x1					0	0	3					2x500mg	30									1	0	0	0	0	0	0	0	0	0	1	979797	979797	979797	979797	979797	979797	979797	979797
2	1	1	201	16	2		1	1x1x25mg						0	0	1	3x25mg	10.5													1	0	0	0	0	0	0	0	0	0	1	979797	979797	979797	979797	979797	979797	979797	979797
2	1	1	201	16	2		4				500mg x2x3x2			0	0	1	3x25mg	10.5													1	0	0	0	0	0	0	0	0	0	1	979797	979797	979797	979797	979797	979797	979797	979797
2	1	1	201	16	2		2		500mlsx1x1					0	0	1	3x25mg	10.5													1	0	0	0	0	0	0	0	0	0	1	979797	979797	979797	979797	979797	979797	979797	979797
2	1	1	202	43	1		4				500mgx2x3x3					2			1x500mls	25											1	0	0	0	0	0	0	0	0		1	979797	979797	979797	979797	979797	979797	979797	979797
2	1	1	202	43	1		2		500mlsx1x1							2			1x500mls	25											1	0	0	0	0	0	0	0	0		1	979797	979797	979797	979797	979797	979797	979797	979797
2	1	1	202	43	1		1	25mgx2x2								2			1x500mls	25											1	0	0	0	0	0	0	0	0		1	979797	979797	979797	979797	979797	979797	979797	979797
2	1	1	202	43	1		6						500mgx2x1x1			2			1x500mls	25											1	0	0	0	0	0	0	0	0		1	979797	979797	979797	979797	979797	979797	979797	979797
2	1	1	202	43	1		4				500mgx2x3x3					3					3x500mg	27									1	0	0	0	0	0	0	0	0		1	979797	979797	979797	979797	979797	979797	979797	979797
2	1	1	202	43	1		2		500mlsx1x1							3					3x500mg	27									1	0	0	0	0	0	0	0	0		1	979797	979797	979797	979797	979797	979797	979797	979797
2	1	1	202	43	1		1	25mgx2x2								3					3x500mg	27									1	0	0	0	0	0	0	0	0		1	979797	979797	979797	979797	979797	979797	979797	979797
2	1	1	202	43	1		6						500mgx2x1x1			3					3x500mg	27									1	0	0	0	0	0	0	0	0		1	979797	979797	979797	979797	979797	979797	979797	979797
2	1	1	202	43	1		4				500mgx2x3x3					1	2x25mg	7													1	0	0	0	0	0	0	0	0		1	979797	979797	979797	979797	979797	979797	979797	979797
2	1	1	202	43	1		2		500mlsx1x1							1	2x25mg	7													1	0	0	0	0	0	0	0	0		1	979797	979797	979797	979797	979797	979797	979797	979797
2	1	1	202	43	1		1	25mgx2x2								1	2x25mg	7													1	0	0	0	0	0	0	0	0		1	979797	979797	979797	979797	979797	979797	979797	979797
2	1	1	202	43	1		6						500mgx2x1x1			1	2x25mg	7													1	0	0	0	0	0	0	0	0		1	979797	979797	979797	979797	979797	979797	979797	979797
2	1	1	202	43	1		4				500mgx2x3x3					6											1x500mg	22.5			1	0	0	0	0	0	0	0	0		1	979797	979797	979797	979797	979797	979797	979797	979797
2	1	1	202	43	1		2		500mlsx1x1							6											1x500mg	22.5			1	0	0	0	0	0	0	0	0		1	979797	979797	979797	979797	979797	979797	979797	979797
2	1	1	202	43	1		1	25mgx2x2								6											1x500mg	22.5			1	0	0	0	0	0	0	0	0		1	979797	979797	979797	979797	979797	979797	979797	979797
2	1	1	202	43	1		6						500mgx2x1x1			6											1x500mg	22.5			1	0	0	0	0	0	0	0	0		1	979797	979797	979797	979797	979797	979797	979797	979797
2	1	1	203	49	1	0	1	25mgx1x1								3					1x500mg	15									1	0	0	0	0	0	0	0	0		1	979797	979797	979797	979797	979797	979797	979797	979797
2	1	1	203	49	1	0	2		500mlsx1x1							3					1x500mg	15									1	0	0	0	0	0	0	0	0		1	979797	979797	979797	979797	979797	979797	979797	979797
2	1	1	203	49	1	0	4				500mgx2x2x1					3					1x500mg	15									1	0	0	0	0	0	0	0	0		1	979797	979797	979797	979797	979797	979797	979797	979797
2	1	1	203	49	1	0	1	25mgx1x1								2			1x500mls	25											1	0	0	0	0	0	0	0	0		1	979797	979797	979797	979797	979797	979797	979797	979797
2	1	1	203	49	1	0	2		500mlsx1x1							2			1x500mls	25											1	0	0	0	0	0	0	0	0		1	979797	979797	979797	979797	979797	979797	979797	979797
2	1	1	203	49	1	0	4				500mgx2x2x1					2			1x500mls	25											1	0	0	0	0	0	0	0	0		1	979797	979797	979797	979797	979797	979797	979797	979797
2	1	1	203	49	1	0	1	25mgx1x1								1	1x25mg	3.5													1	0	0	0	0	0	0	0	0		1	979797	979797	979797	979797	979797	979797	979797	979797
2	1	1	203	49	1	0	2		500mlsx1x1							1	1x25mg	3.5													1	0	0	0	0	0	0	0	0		1	979797	979797	979797	979797	979797	979797	979797	979797
2	1	1	203	49	1	0	4				500mgx2x2x1					1	1x25mg	3.5													1	0	0	0	0	0	0	0	0		1	979797	979797	979797	979797	979797	979797	979797	979797
2	1	1	204	25	2	0	1	25mgx1x1								6											1x2.50	2.5			1	0	0	0	0	0	0	0	0		1	979797	979797	979797	979797	979797	979797	979797	979797
2	1	1	204	25	2	0	6						20mgx1x1			6											1x2.50	2.5			1	0	0	0	0	0	0	0	0		1	979797	979797	979797	979797	979797	979797	979797	979797
2	1	1	204	25	2	0	1	25mgx1x1								1	1x25mg	3.5													1	0	0	0	0	0	0	0	0		1	979797	979797	979797	979797	979797	979797	979797	979797
2	1	1	204	25	2	0	6						20mgx1x1			1	1x25mg	3.5													1	0	0	0	0	0	0	0	0		1	979797	979797	979797	979797	979797	979797	979797	979797
2	1	1	205	17	2	0	6						20mgx1x1x1			5									1x500mg	36			0	0	1	0	0	0	0	0	0	0	0		1	979797	979797	979797	979797	979797	979797	979797	979797
2	1	1	205	17	2	0	5					500mgx1x1x1				5									1x500mg	36			0	0	1	0	0	0	0	0	0	0	0		1	979797	979797	979797	979797	979797	979797	979797	979797
2	1	1	205	17	2	0	1	25mgx1x1								5									1x500mg	36			0	0	1	0	0	0	0	0	0	0	0		1	979797	979797	979797	979797	979797	979797	979797	979797
2	1	1	205	17	2	0	6						20mgx1x1x1			6											1x500mg	22.5	0	0	1	0	0	0	0	0	0	0	0		1	979797	979797	979797	979797	979797	979797	979797	979797
2	1	1	205	17	2	0	5					500mgx1x1x1				6											1x500mg	22.5	0	0	1	0	0	0	0	0	0	0	0		1	979797	979797	979797	979797	979797	979797	979797	979797
2	1	1	205	17	2	0	1	25mgx1x1								6											1x500mg	22.5	0	0	1	0	0	0	0	0	0	0	0		1	979797	979797	979797	979797	979797	979797	979797	979797
2	1	1	205	17	2	0	6						20mgx1x1x1			1	1x20mg	3.5											0	0	1	0	0	0	0	0	0	0	0		1	979797	979797	979797	979797	979797	979797	979797	979797
2	1	1	205	17	2	0	5					500mgx1x1x1				1	1x20mg	3.5											0	0	1	0	0	0	0	0	0	0	0		1	979797	979797	979797	979797	979797	979797	979797	979797
2	1	1	205	17	2	0	1	25mgx1x1								1	1x20mg	3.5											0	0	1	0	0	0	0	0	0	0	0		1	979797	979797	979797	979797	979797	979797	979797	979797
2	1	1	206	1	1	0	5					500mgx1x1				1	2x500mg	7													1	0	0	0	0	0	0	0	0		1	979797	979797	979797	979797	979797	979797	979797	979797
2	1	1	206	1	1	0	6						500mgx1x1			1	2x500mg	7													1	0	0	0	0	0	0	0	0		1	979797	979797	979797	979797	979797	979797	979797	979797
2	1	1	206	1	1	0	2		500mlsx1x1							1	2x500mg	7													1	0	0	0	0	0	0	0	0		1	979797	979797	979797	979797	979797	979797	979797	979797
2	1	1	206	1	1	0	1	500mgx1x2x2								1	2x500mg	7													1	0	0	0	0	0	0	0	0		1	979797	979797	979797	979797	979797	979797	979797	979797
2	1	1	206	1	1	0	5					500mgx1x1				6											2x500mg	50			1	0	0	0	0	0	0	0	0		1	979797	979797	979797	979797	979797	979797	979797	979797
2	1	1	206	1	1	0	6						500mgx1x1			6											2x500mg	50			1	0	0	0	0	0	0	0	0		1	979797	979797	979797	979797	979797	979797	979797	979797
2	1	1	206	1	1	0	2		500mlsx1x1							6											2x500mg	50			1	0	0	0	0	0	0	0	0		1	979797	979797	979797	979797	979797	979797	979797	979797
2	1	1	206	1	1	0	1	500mgx1x2x2								6											2x500mg	50			1	0	0	0	0	0	0	0	0		1	979797	979797	979797	979797	979797	979797	979797	979797
2	1	1	206	1	1	0	5					500mgx1x1				2			1x500mls	25											1	0	0	0	0	0	0	0	0		1	979797	979797	979797	979797	979797	979797	979797	979797
2	1	1	206	1	1	0	6						500mgx1x1			2			1x500mls	25											1	0	0	0	0	0	0	0	0		1	979797	979797	979797	979797	979797	979797	979797	979797
2	1	1	206	1	1	0	2		500mlsx1x1							2			1x500mls	25											1	0	0	0	0	0	0	0	0		1	979797	979797	979797	979797	979797	979797	979797	979797
2	1	1	206	1	1	0	1	500mgx1x2x2								2			1x500mls	25											1	0	0	0	0	0	0	0	0		1	979797	979797	979797	979797	979797	979797	979797	979797
2	1	1	206	1	1	0	5					500mgx1x1				5									1x36	36					1	0	0	0	0	0	0	0	0		1	979797	979797	979797	979797	979797	979797	979797	979797
2	1	1	206	1	1	0	6						500mgx1x1			5									1x36	36					1	0	0	0	0	0	0	0	0		1	979797	979797	979797	979797	979797	979797	979797	979797
2	1	1	206	1	1	0	2		500mlsx1x1							5									1x36	36					1	0	0	0	0	0	0	0	0		1	979797	979797	979797	979797	979797	979797	979797	979797
2	1	1	206	1	1	0	1	500mgx1x2x2								5									1x36	36					1	0	0	0	0	0	0	0	0		1	979797	979797	979797	979797	979797	979797	979797	979797
2	1	1	207	43	2	0	6						1x20mg			2			1x400mls	20											1	0	0	0	0	0	0	0	0		1	979797	979797	979797	979797	979797	979797	979797	979797
2	1	1	207	43	2	0	2		400mlx1x1							2			1x400mls	20											1	0	0	0	0	0	0	0	0		1	979797	979797	979797	979797	979797	979797	979797	979797
2	1	1	207	43	2	0	1	25mgx2x2								2			1x400mls	20											1	0	0	0	0	0	0	0	0		1	979797	979797	979797	979797	979797	979797	979797	979797
2	1	1	207	43	2	0	6						1x20mg			6											1x500mg	22.5			1	0	0	0	0	0	0	0	0		1	979797	979797	979797	979797	979797	979797	979797	979797
2	1	1	207	43	2	0	2		400mlx1x1							6											1x500mg	22.5			1	0	0	0	0	0	0	0	0		1	979797	979797	979797	979797	979797	979797	979797	979797
2	1	1	207	43	2	0	1	25mgx2x2								6											1x500mg	22.5			1	0	0	0	0	0	0	0	0		1	979797	979797	979797	979797	979797	979797	979797	979797
2	1	1	207	43	2	0	6						1x20mg			1	2x25mg	3.5													1	0	0	0	0	0	0	0	0		1	979797	979797	979797	979797	979797	979797	979797	979797
2	1	1	207	43	2	0	2		400mlx1x1							1	2x25mg	3.5													1	0	0	0	0	0	0	0	0		1	979797	979797	979797	979797	979797	979797	979797	979797
2	1	1	207	43	2	0	1	25mgx2x2								1	2x25mg	3.5													1	0	0	0	0	0	0	0	0		1	979797	979797	979797	979797	979797	979797	979797	979797
2	1	1	208	22	2	0	1	1000mlx2x2								1	2x25mg	7													1	0	0	0	0	0	0	0	0	0	1	979797	979797	979797	979797	979797	979797	979797	979797
2	1	1	209	29	1	0	2		500mlsx1x1							2			1x500mls	25											1	0	0	0	0	0	0	0	0		1	979797	979797	979797	979797	979797	979797	979797	979797
2	1	1	209	29	1	0	4				500mgx1x3					2			1x500mls	25											1	0	0	0	0	0	0	0	0		1	979797	979797	979797	979797	979797	979797	979797	979797
2	1	1	209	29	1	0	1	25mgx2x2								2			1x500mls	25											1	0	0	0	0	0	0	0	0		1	979797	979797	979797	979797	979797	979797	979797	979797
2	1	1	209	29	1	0	2		500mlsx1x1							1	2x25mg	7													1	0	0	0	0	0	0	0	0		1	979797	979797	979797	979797	979797	979797	979797	979797
2	1	1	209	29	1	0	4				500mgx1x3					1	2x25mg	7													1	0	0	0	0	0	0	0	0		1	979797	979797	979797	979797	979797	979797	979797	979797
2	1	1	209	29	1	0	1	25mgx2x2								1	2x25mg	7													1	0	0	0	0	0	0	0	0		1	979797	979797	979797	979797	979797	979797	979797	979797
2	1	1	209	29	1	0	2		500mlsx1x1							3					3x500mg	45									1	0	0	0	0	0	0	0	0		1	979797	979797	979797	979797	979797	979797	979797	979797
2	1	1	209	29	1	0	4				500mgx1x3					3					3x500mg	45									1	0	0	0	0	0	0	0	0		1	979797	979797	979797	979797	979797	979797	979797	979797
2	1	1	209	29	1	0	1	25mgx2x2								3					3x500mg	45									1	0	0	0	0	0	0	0	0		1	979797	979797	979797	979797	979797	979797	979797	979797
2	1	1	301	19	1		4				500mg/ml×1					2			8×500	200											1	1									979797	979797	979797	979797	979797	979797	979797	979797	979797
2	1	1	301	19	1		2		4littles							2			8×500	200											1	1									979797	979797	979797	979797	979797	979797	979797	979797	979797
2	1	1	301	19	1		1									2			8×500	200											1	1									979797	979797	979797	979797	979797	979797	979797	979797	979797
2	1	1	301	19	1		4				500mg/ml×1					1	3.50×2	7													1	1									979797	979797	979797	979797	979797	979797	979797	979797	979797
2	1	1	301	19	1		2		4littles							1	3.50×2	7													1	1									979797	979797	979797	979797	979797	979797	979797	979797	979797
2	1	1	301	19	1		1									1	3.50×2	7													1	1									979797	979797	979797	979797	979797	979797	979797	979797	979797
2	1	1	301	19	1		4				500mg/ml×1					3					1×200	2									1	1									979797	979797	979797	979797	979797	979797	979797	979797	979797
2	1	1	301	19	1		2		4littles							3					1×200	2									1	1									979797	979797	979797	979797	979797	979797	979797	979797	979797
2	1	1	301	19	1		1									3					1×200	2									1	1									979797	979797	979797	979797	979797	979797	979797	979797	979797
2	1	1	301	19	1		4				500mg/ml×1																				1	1									979797	979797	979797	979797	979797	979797	979797	979797	979797
2	1	1	301	19	1		2		4littles																						1	1									979797	979797	979797	979797	979797	979797	979797	979797	979797
2	1	1	301	19	1		1																								1	1									979797	979797	979797	979797	979797	979797	979797	979797	979797
2	1	1	302	39	1		1									6											1×3	6			1	1									979797	979797	979797	979797	979797	979797	979797	979797	979797
2	1	1	302	39	1		6						1tabket			6											1×3	6			1	1									979797	979797	979797	979797	979797	979797	979797	979797	979797
2	1	1	302	39	1		4									6											1×3	6			1	1									979797	979797	979797	979797	979797	979797	979797	979797	979797
2	1	1	302	39	1		1									1															1	1									979797	979797	979797	979797	979797	979797	979797	979797	979797
2	1	1	302	39	1		6						1tabket			1															1	1									979797	979797	979797	979797	979797	979797	979797	979797	979797
2	1	1	302	39	1		4									1															1	1									979797	979797	979797	979797	979797	979797	979797	979797	979797
2	1	1	302	39	1		1									3															1	1									979797	979797	979797	979797	979797	979797	979797	979797	979797
2	1	1	302	39	1		6						1tabket			3															1	1									979797	979797	979797	979797	979797	979797	979797	979797	979797
2	1	1	302	39	1		4									3															1	1									979797	979797	979797	979797	979797	979797	979797	979797	979797
2	1	1	303	4	2		2									2															1	1									979797	979797	979797	979797	979797	979797	979797	979797	979797
2	1	1	303	4	2		6									2															1	1									979797	979797	979797	979797	979797	979797	979797	979797	979797
2	1	1	303	4	2		1									2															1	1									979797	979797	979797	979797	979797	979797	979797	979797	979797
2	1	1	303	4	2		2									2															1	1									979797	979797	979797	979797	979797	979797	979797	979797	979797
2	1	1	303	4	2		6									2															1	1									979797	979797	979797	979797	979797	979797	979797	979797	979797
2	1	1	303	4	2		1									2															1	1									979797	979797	979797	979797	979797	979797	979797	979797	979797
2	1	1	303	4	2		2									6															1	1									979797	979797	979797	979797	979797	979797	979797	979797	979797
2	1	1	303	4	2		6									6															1	1									979797	979797	979797	979797	979797	979797	979797	979797	979797
2	1	1	303	4	2		1									6															1	1									979797	979797	979797	979797	979797	979797	979797	979797	979797
2	1	1	303	4	2		2									3															1	1									979797	979797	979797	979797	979797	979797	979797	979797	979797
2	1	1	303	4	2		6									3															1	1									979797	979797	979797	979797	979797	979797	979797	979797	979797
2	1	1	303	4	2		1									3															1	1									979797	979797	979797	979797	979797	979797	979797	979797	979797
2	1	1	304	2	2		1									3					1x3	3									1	1									979797	979797	979797	979797	979797	979797	979797	979797	979797
2	1	1	304	2	2		4				20mg					3					1x3	3									1	1									979797	979797	979797	979797	979797	979797	979797	979797	979797
2	1	1	304	2	2		6						20x7x7			3					1x3	3									1	1									979797	979797	979797	979797	979797	979797	979797	979797	979797
2	1	1	304	2	2		1									3					1x3	3									1	1									979797	979797	979797	979797	979797	979797	979797	979797	979797
2	1	1	304	2	2		2		500x1							3					1x3	3									1	1									979797	979797	979797	979797	979797	979797	979797	979797	979797
2	1	1	304	2	2		1									1															1	1									979797	979797	979797	979797	979797	979797	979797	979797	979797
2	1	1	304	2	2		4				20mg					1															1	1									979797	979797	979797	979797	979797	979797	979797	979797	979797
2	1	1	304	2	2		6						20x7x7			1															1	1									979797	979797	979797	979797	979797	979797	979797	979797	979797
2	1	1	304	2	2		1									1															1	1									979797	979797	979797	979797	979797	979797	979797	979797	979797
2	1	1	304	2	2		2		500x1							1															1	1									979797	979797	979797	979797	979797	979797	979797	979797	979797
2	1	1	304	2	2		1									2			1x25	25											1	1									979797	979797	979797	979797	979797	979797	979797	979797	979797
2	1	1	304	2	2		4				20mg					2			1x25	25											1	1									979797	979797	979797	979797	979797	979797	979797	979797	979797
2	1	1	304	2	2		6						20x7x7			2			1x25	25											1	1									979797	979797	979797	979797	979797	979797	979797	979797	979797
2	1	1	304	2	2		1									2			1x25	25											1	1									979797	979797	979797	979797	979797	979797	979797	979797	979797
2	1	1	304	2	2		2		500x1							2			1x25	25											1	1									979797	979797	979797	979797	979797	979797	979797	979797	979797
2	1	1	304	2	2		1									6											14x2.5	35			1	1									979797	979797	979797	979797	979797	979797	979797	979797	979797
2	1	1	304	2	2		4				20mg					6											14x2.5	35			1	1									979797	979797	979797	979797	979797	979797	979797	979797	979797
2	1	1	304	2	2		6						20x7x7			6											14x2.5	35			1	1									979797	979797	979797	979797	979797	979797	979797	979797	979797
2	1	1	304	2	2		1									6											14x2.5	35			1	1									979797	979797	979797	979797	979797	979797	979797	979797	979797
2	1	1	304	2	2		2		500x1							6											14x2.5	35			1	1									979797	979797	979797	979797	979797	979797	979797	979797	979797
2	1	1	305	34	1		1									1															1	1									979797	979797	979797	979797	979797	979797	979797	979797	979797
2	1	1	305	34	1		4									1															1	1									979797	979797	979797	979797	979797	979797	979797	979797	979797
2	1	1	305	34	1		1									3															1	1									979797	979797	979797	979797	979797	979797	979797	979797	979797
2	1	1	305	34	1		4									3															1	1									979797	979797	979797	979797	979797	979797	979797	979797	979797
2	1	1	306	4	1		5									3															1	1									979797	979797	979797	979797	979797	979797	979797	979797	979797
2	1	1	306	4	1		2		4littles							3															1	1									979797	979797	979797	979797	979797	979797	979797	979797	979797
2	1	1	306	4	1		4									3															1	1									979797	979797	979797	979797	979797	979797	979797	979797	979797
2	1	1	306	4	1		1									3															1	1									979797	979797	979797	979797	979797	979797	979797	979797	979797
2	1	1	306	4	1		5									5															1	1									979797	979797	979797	979797	979797	979797	979797	979797	979797
2	1	1	306	4	1		2		4littles							5															1	1									979797	979797	979797	979797	979797	979797	979797	979797	979797
2	1	1	306	4	1		4									5															1	1									979797	979797	979797	979797	979797	979797	979797	979797	979797
2	1	1	306	4	1		1									5															1	1									979797	979797	979797	979797	979797	979797	979797	979797	979797
2	1	1	306	4	1		5									2			8x25	200											1	1									979797	979797	979797	979797	979797	979797	979797	979797	979797
2	1	1	306	4	1		2		4littles							2			8x25	200											1	1									979797	979797	979797	979797	979797	979797	979797	979797	979797
2	1	1	306	4	1		4									2			8x25	200											1	1									979797	979797	979797	979797	979797	979797	979797	979797	979797
2	1	1	306	4	1		1									2			8x25	200											1	1									979797	979797	979797	979797	979797	979797	979797	979797	979797
2	1	1	306	4	1		5									1															1	1									979797	979797	979797	979797	979797	979797	979797	979797	979797
2	1	1	306	4	1		2		4littles							1															1	1									979797	979797	979797	979797	979797	979797	979797	979797	979797
2	1	1	306	4	1		4									1															1	1									979797	979797	979797	979797	979797	979797	979797	979797	979797
2	1	1	306	4	1		1									1															1	1									979797	979797	979797	979797	979797	979797	979797	979797	979797
2	1	1	307	15	1		4									1															1	1									979797	979797	979797	979797	979797	979797	979797	979797	979797
2	1	1	307	15	1		1									1															1	1									979797	979797	979797	979797	979797	979797	979797	979797	979797
2	1	1	307	15	1		4									3															1	1									979797	979797	979797	979797	979797	979797	979797	979797	979797
2	1	1	307	15	1		1									3															1	1									979797	979797	979797	979797	979797	979797	979797	979797	979797
2	1	1	308	34	2		4				500x5					1	2x3.50	8													1	1									979797	979797	979797	979797	979797	979797	979797	979797	979797
2	1	1	308	34	2		1	2littlesx4								1	2x3.50	8													1	1									979797	979797	979797	979797	979797	979797	979797	979797	979797
2	1	1	308	34	2		2		200mlx1							1	2x3.50	8													1	1									979797	979797	979797	979797	979797	979797	979797	979797	979797
2	1	1	308	34	2		4				500x5					3					500x1.50	7.5									1	1									979797	979797	979797	979797	979797	979797	979797	979797	979797
2	1	1	308	34	2		1	2littlesx4								3					500x1.50	7.5									1	1									979797	979797	979797	979797	979797	979797	979797	979797	979797
2	1	1	308	34	2		2		200mlx1							3					500x1.50	7.5									1	1									979797	979797	979797	979797	979797	979797	979797	979797	979797
2	1	1	308	34	2		4				500x5					2			4x25	100											1	1									979797	979797	979797	979797	979797	979797	979797	979797	979797
2	1	1	308	34	2		1	2littlesx4								2			4x25	100											1	1									979797	979797	979797	979797	979797	979797	979797	979797	979797
2	1	1	308	34	2		2		200mlx1							2			4x25	100											1	1									979797	979797	979797	979797	979797	979797	979797	979797	979797
2	1	1	309	27	2		6						500mg			1															1	1									979797	979797	979797	979797	979797	979797	979797	979797	979797
2	1	1	309	27	2		2		100x1x1							1															1	1									979797	979797	979797	979797	979797	979797	979797	979797	979797
2	1	1	309	27	2		1									1															1	1									979797	979797	979797	979797	979797	979797	979797	979797	979797
2	1	1	309	27	2		6						500mg			3															1	1									979797	979797	979797	979797	979797	979797	979797	979797	979797
2	1	1	309	27	2		2		100x1x1							3															1	1									979797	979797	979797	979797	979797	979797	979797	979797	979797
2	1	1	309	27	2		1									3															1	1									979797	979797	979797	979797	979797	979797	979797	979797	979797
2	1	1	309	27	2		6						500mg			6											1×3	3			1	1									979797	979797	979797	979797	979797	979797	979797	979797	979797
2	1	1	309	27	2		2		100x1x1							6											1×3	3			1	1									979797	979797	979797	979797	979797	979797	979797	979797	979797
2	1	1	309	27	2		1									6											1×3	3			1	1									979797	979797	979797	979797	979797	979797	979797	979797	979797
2	1	1	309	27	2		6						500mg			2			2x25	50											1	1									979797	979797	979797	979797	979797	979797	979797	979797	979797
2	1	1	309	27	2		2		100x1x1							2			2x25	50											1	1									979797	979797	979797	979797	979797	979797	979797	979797	979797
2	1	1	309	27	2		1									2			2x25	50											1	1									979797	979797	979797	979797	979797	979797	979797	979797	979797
2	1	1	310	14	1		1	2500mlx1 x1								3					500×1.50	1.5									1	1									979797	979797	979797	979797	979797	979797	979797	979797	979797
2	1	1	310	14	1		4				500mg					3					500×1.50	1.5									1	1									979797	979797	979797	979797	979797	979797	979797	979797	979797
2	1	1	310	14	1		2		400mlx1x1							3					500×1.50	1.5									1	1									979797	979797	979797	979797	979797	979797	979797	979797	979797
2	1	1	310	14	1		1	2500mlx1 x1								1	15×3.50	52.5													1	1									979797	979797	979797	979797	979797	979797	979797	979797	979797
2	1	1	310	14	1		4				500mg					1	15×3.50	52.5													1	1									979797	979797	979797	979797	979797	979797	979797	979797	979797
2	1	1	310	14	1		2		400mlx1x1							1	15×3.50	52.5													1	1									979797	979797	979797	979797	979797	979797	979797	979797	979797
2	1	1	310	14	1		1	2500mlx1 x1								2			8×25	200											1	1									979797	979797	979797	979797	979797	979797	979797	979797	979797
2	1	1	310	14	1		4				500mg					2			8×25	200											1	1									979797	979797	979797	979797	979797	979797	979797	979797	979797
2	1	1	310	14	1		2		400mlx1x1							2			8×25	200											1	1									979797	979797	979797	979797	979797	979797	979797	979797	979797
2	1	1	311	25	2		2									3															1	1									979797	979797	979797	979797	979797	979797	979797	979797	979797
2	1	1	311	25	2		2									3															1	1									979797	979797	979797	979797	979797	979797	979797	979797	979797
2	1	1	311	25	2		4									3															1	1									979797	979797	979797	979797	979797	979797	979797	979797	979797
2	1	1	311	25	2		1									3															1	1									979797	979797	979797	979797	979797	979797	979797	979797	979797
2	1	1	311	25	2		2									2															1	1									979797	979797	979797	979797	979797	979797	979797	979797	979797
2	1	1	311	25	2		2									2															1	1									979797	979797	979797	979797	979797	979797	979797	979797	979797
2	1	1	311	25	2		4									2															1	1									979797	979797	979797	979797	979797	979797	979797	979797	979797
2	1	1	311	25	2		1									2															1	1									979797	979797	979797	979797	979797	979797	979797	979797	979797
2	1	1	311	25	2		2									1															1	1									979797	979797	979797	979797	979797	979797	979797	979797	979797
2	1	1	311	25	2		2									1															1	1									979797	979797	979797	979797	979797	979797	979797	979797	979797
2	1	1	311	25	2		4									1															1	1									979797	979797	979797	979797	979797	979797	979797	979797	979797
2	1	1	311	25	2		1									1															1	1									979797	979797	979797	979797	979797	979797	979797	979797	979797
2	1	1	312	7	2		5									2															1	1									979797	979797	979797	979797	979797	979797	979797	979797	979797
2	1	1	312	7	2		1									2															1	1									979797	979797	979797	979797	979797	979797	979797	979797	979797
2	1	1	312	7	2		2									2															1	1									979797	979797	979797	979797	979797	979797	979797	979797	979797
2	1	1	312	7	2		5									5															1	1									979797	979797	979797	979797	979797	979797	979797	979797	979797
2	1	1	312	7	2		1									5															1	1									979797	979797	979797	979797	979797	979797	979797	979797	979797
2	1	1	312	7	2		2									5															1	1									979797	979797	979797	979797	979797	979797	979797	979797	979797
2	1	1	312	7	2		5									1															1	1									979797	979797	979797	979797	979797	979797	979797	979797	979797
2	1	1	312	7	2		1									1															1	1									979797	979797	979797	979797	979797	979797	979797	979797	979797
2	1	1	312	7	2		2									1															1	1									979797	979797	979797	979797	979797	979797	979797	979797	979797
2	1	1	313	35	1		1									1															1	1									979797	979797	979797	979797	979797	979797	979797	979797	979797
2	1	1	313	35	1		4									1															1	1									979797	979797	979797	979797	979797	979797	979797	979797	979797
2	1	1	313	35	1		2									1															1	1									979797	979797	979797	979797	979797	979797	979797	979797	979797
2	1	1	313	35	1		1									3															1	1									979797	979797	979797	979797	979797	979797	979797	979797	979797
2	1	1	313	35	1		4									3															1	1									979797	979797	979797	979797	979797	979797	979797	979797	979797
2	1	1	313	35	1		2									3															1	1									979797	979797	979797	979797	979797	979797	979797	979797	979797
2	1	1	313	35	1		1									2															1	1									979797	979797	979797	979797	979797	979797	979797	979797	979797
2	1	1	313	35	1		4									2															1	1									979797	979797	979797	979797	979797	979797	979797	979797	979797
2	1	1	313	35	1		2									2															1	1									979797	979797	979797	979797	979797	979797	979797	979797	979797
2	1	1	314	8	1		4									1															1	1									979797	979797	979797	979797	979797	979797	979797	979797	979797
2	1	1	314	8	1		1									1															1	1									979797	979797	979797	979797	979797	979797	979797	979797	979797
2	1	1	314	8	1		4									3															1	1									979797	979797	979797	979797	979797	979797	979797	979797	979797
2	1	1	314	8	1		1									3															1	1									979797	979797	979797	979797	979797	979797	979797	979797	979797
2	1	1	315	45	1		1									1															1	1									979797	979797	979797	979797	979797	979797	979797	979797	979797
2	1	1	315	45	1		4									1															1	1									979797	979797	979797	979797	979797	979797	979797	979797	979797
2	1	1	315	45	1		2									1															1	1									979797	979797	979797	979797	979797	979797	979797	979797	979797
2	1	1	315	45	1		1									2															1	1									979797	979797	979797	979797	979797	979797	979797	979797	979797
2	1	1	315	45	1		4									2															1	1									979797	979797	979797	979797	979797	979797	979797	979797	979797
2	1	1	315	45	1		2									2															1	1									979797	979797	979797	979797	979797	979797	979797	979797	979797
2	1	1	315	45	1		1									3															1	1									979797	979797	979797	979797	979797	979797	979797	979797	979797
2	1	1	315	45	1		4									3															1	1									979797	979797	979797	979797	979797	979797	979797	979797	979797
2	1	1	315	45	1		2									3															1	1									979797	979797	979797	979797	979797	979797	979797	979797	979797
3	1	1	101	38	2		4				500mgx2x3x3					2			4x25	100											1	0	0	0	0	0	0	0	0		979797	979797	979797	979797	979797	979797	979797	979797	979797
3	1	1	101	38	2		1	25mgx2x3								2			4x25	100											1	0	0	0	0	0	0	0	0		979797	979797	979797	979797	979797	979797	979797	979797	979797
3	1	1	101	38	2		6						500mgx2x3x3			2			4x25	100											1	0	0	0	0	0	0	0	0		979797	979797	979797	979797	979797	979797	979797	979797	979797
3	1	1	101	38	2		2		500mlsx2x2							2			4x25	100											1	0	0	0	0	0	0	0	0		979797	979797	979797	979797	979797	979797	979797	979797	979797
3	1	1	101	38	2		4				500mgx2x3x3					6											2.25x18	100			1	0	0	0	0	0	0	0	0		979797	979797	979797	979797	979797	979797	979797	979797	979797
3	1	1	101	38	2		1	25mgx2x3								6											2.25x18	100			1	0	0	0	0	0	0	0	0		979797	979797	979797	979797	979797	979797	979797	979797	979797
3	1	1	101	38	2		6						500mgx2x3x3			6											2.25x18	100			1	0	0	0	0	0	0	0	0		979797	979797	979797	979797	979797	979797	979797	979797	979797
3	1	1	101	38	2		2		500mlsx2x2							6											2.25x18	100			1	0	0	0	0	0	0	0	0		979797	979797	979797	979797	979797	979797	979797	979797	979797
3	1	1	101	38	2		4				500mgx2x3x3					3					1.50x18	27									1	0	0	0	0	0	0	0	0		979797	979797	979797	979797	979797	979797	979797	979797	979797
3	1	1	101	38	2		1	25mgx2x3								3					1.50x18	27									1	0	0	0	0	0	0	0	0		979797	979797	979797	979797	979797	979797	979797	979797	979797
3	1	1	101	38	2		6						500mgx2x3x3			3					1.50x18	27									1	0	0	0	0	0	0	0	0		979797	979797	979797	979797	979797	979797	979797	979797	979797
3	1	1	101	38	2		2		500mlsx2x2							3					1.50x18	27									1	0	0	0	0	0	0	0	0		979797	979797	979797	979797	979797	979797	979797	979797	979797
3	1	1	101	38	2		4				500mgx2x3x3					1	3x3.50	10.5													1	0	0	0	0	0	0	0	0		979797	979797	979797	979797	979797	979797	979797	979797	979797
3	1	1	101	38	2		1	25mgx2x3								1	3x3.50	10.5													1	0	0	0	0	0	0	0	0		979797	979797	979797	979797	979797	979797	979797	979797	979797
3	1	1	101	38	2		6						500mgx2x3x3			1	3x3.50	10.5													1	0	0	0	0	0	0	0	0		979797	979797	979797	979797	979797	979797	979797	979797	979797
3	1	1	101	38	2		2		500mlsx2x2							1	3x3.50	10.5													1	0	0	0	0	0	0	0	0		979797	979797	979797	979797	979797	979797	979797	979797	979797
3	1	1	102	24	1		1	25mgx2x3								3					1.50x18	27							0	0	1	0	0	0	0	0	0	0	0		979797	979797	979797	979797	979797	979797	979797	979797	979797
3	1	1	102	24	1		4				500mgx2x3x3					3					1.50x18	27							0	0	1	0	0	0	0	0	0	0	0		979797	979797	979797	979797	979797	979797	979797	979797	979797
3	1	1	102	24	1		2		500mlsx2x2							3					1.50x18	27							0	0	1	0	0	0	0	0	0	0	0		979797	979797	979797	979797	979797	979797	979797	979797	979797
3	1	1	102	24	1		6						500mgx2x3x3			3					1.50x18	27							0	0	1	0	0	0	0	0	0	0	0		979797	979797	979797	979797	979797	979797	979797	979797	979797
3	1	1	102	24	1		1	25mgx2x3								1	3x3.50	10.5											0	0	1	0	0	0	0	0	0	0	0		979797	979797	979797	979797	979797	979797	979797	979797	979797
3	1	1	102	24	1		4				500mgx2x3x3					1	3x3.50	10.5											0	0	1	0	0	0	0	0	0	0	0		979797	979797	979797	979797	979797	979797	979797	979797	979797
3	1	1	102	24	1		2		500mlsx2x2							1	3x3.50	10.5											0	0	1	0	0	0	0	0	0	0	0		979797	979797	979797	979797	979797	979797	979797	979797	979797
3	1	1	102	24	1		6						500mgx2x3x3			1	3x3.50	10.5											0	0	1	0	0	0	0	0	0	0	0		979797	979797	979797	979797	979797	979797	979797	979797	979797
3	1	1	102	24	1		1	25mgx2x3								2			4x25	100									0	0	1	0	0	0	0	0	0	0	0		979797	979797	979797	979797	979797	979797	979797	979797	979797
3	1	1	102	24	1		4				500mgx2x3x3					2			4x25	100									0	0	1	0	0	0	0	0	0	0	0		979797	979797	979797	979797	979797	979797	979797	979797	979797
3	1	1	102	24	1		2		500mlsx2x2							2			4x25	100									0	0	1	0	0	0	0	0	0	0	0		979797	979797	979797	979797	979797	979797	979797	979797	979797
3	1	1	102	24	1		6						500mgx2x3x3			2			4x25	100									0	0	1	0	0	0	0	0	0	0	0		979797	979797	979797	979797	979797	979797	979797	979797	979797
3	1	1	102	24	1		1	25mgx2x3								6											2.25x18	40.5	0	0	1	0	0	0	0	0	0	0	0		979797	979797	979797	979797	979797	979797	979797	979797	979797
3	1	1	102	24	1		4				500mgx2x3x3					6											2.25x18	40.5	0	0	1	0	0	0	0	0	0	0	0		979797	979797	979797	979797	979797	979797	979797	979797	979797
3	1	1	102	24	1		2		500mlsx2x2							6											2.25x18	40.5	0	0	1	0	0	0	0	0	0	0	0		979797	979797	979797	979797	979797	979797	979797	979797	979797
3	1	1	102	24	1		6						500mgx2x3x3			6											2.25x18	40.5	0	0	1	0	0	0	0	0	0	0	0		979797	979797	979797	979797	979797	979797	979797	979797	979797
3	1	1	103	46	1		4				500mgx2x3x3					2			4x25	100									0	0	1	0	0	0	0	0	0	0	0		979797	979797	979797	979797	979797	979797	979797	979797	979797
3	1	1	103	46	1		1	25mgx2x3								2			4x25	100									0	0	1	0	0	0	0	0	0	0	0		979797	979797	979797	979797	979797	979797	979797	979797	979797
3	1	1	103	46	1		6						500mgx2x3x3			2			4x25	100									0	0	1	0	0	0	0	0	0	0	0		979797	979797	979797	979797	979797	979797	979797	979797	979797
3	1	1	103	46	1		2		500mlsx2x2							2			4x25	100									0	0	1	0	0	0	0	0	0	0	0		979797	979797	979797	979797	979797	979797	979797	979797	979797
3	1	1	103	46	1		4				500mgx2x3x3					3					1.50x18	27							0	0	1	0	0	0	0	0	0	0	0		979797	979797	979797	979797	979797	979797	979797	979797	979797
3	1	1	103	46	1		1	25mgx2x3								3					1.50x18	27							0	0	1	0	0	0	0	0	0	0	0		979797	979797	979797	979797	979797	979797	979797	979797	979797
3	1	1	103	46	1		6						500mgx2x3x3			3					1.50x18	27							0	0	1	0	0	0	0	0	0	0	0		979797	979797	979797	979797	979797	979797	979797	979797	979797
3	1	1	103	46	1		2		500mlsx2x2							3					1.50x18	27							0	0	1	0	0	0	0	0	0	0	0		979797	979797	979797	979797	979797	979797	979797	979797	979797
3	1	1	103	46	1		4				500mgx2x3x3					1	3x3.50	10.5											0	0	1	0	0	0	0	0	0	0	0		979797	979797	979797	979797	979797	979797	979797	979797	979797
3	1	1	103	46	1		1	25mgx2x3								1	3x3.50	10.5											0	0	1	0	0	0	0	0	0	0	0		979797	979797	979797	979797	979797	979797	979797	979797	979797
3	1	1	103	46	1		6						500mgx2x3x3			1	3x3.50	10.5											0	0	1	0	0	0	0	0	0	0	0		979797	979797	979797	979797	979797	979797	979797	979797	979797
3	1	1	103	46	1		2		500mlsx2x2							1	3x3.50	10.5											0	0	1	0	0	0	0	0	0	0	0		979797	979797	979797	979797	979797	979797	979797	979797	979797
3	1	1	103	46	1		4				500mgx2x3x3					6											2.25x18	40.5	0	0	1	0	0	0	0	0	0	0	0		979797	979797	979797	979797	979797	979797	979797	979797	979797
3	1	1	103	46	1		1	25mgx2x3								6											2.25x18	40.5	0	0	1	0	0	0	0	0	0	0	0		979797	979797	979797	979797	979797	979797	979797	979797	979797
3	1	1	103	46	1		6						500mgx2x3x3			6											2.25x18	40.5	0	0	1	0	0	0	0	0	0	0	0		979797	979797	979797	979797	979797	979797	979797	979797	979797
3	1	1	103	46	1		2		500mlsx2x2							6											2.25x18	40.5	0	0	1	0	0	0	0	0	0	0	0		979797	979797	979797	979797	979797	979797	979797	979797	979797
3	1	1	104	28	2		2		500mlsx2x2							2			4x25	100											1	0	0	0	0	0	0	0	0		979797	979797	979797	979797	979797	979797	979797	979797	979797
3	1	1	104	28	2		4				500mgx2x3x3					2			4x25	100											1	0	0	0	0	0	0	0	0		979797	979797	979797	979797	979797	979797	979797	979797	979797
3	1	1	104	28	2		1	25mgx2x3								2			4x25	100											1	0	0	0	0	0	0	0	0		979797	979797	979797	979797	979797	979797	979797	979797	979797
3	1	1	104	28	2		2		500mlsx2x2							3					1.50x18	27									1	0	0	0	0	0	0	0	0		979797	979797	979797	979797	979797	979797	979797	979797	979797
3	1	1	104	28	2		4				500mgx2x3x3					3					1.50x18	27									1	0	0	0	0	0	0	0	0		979797	979797	979797	979797	979797	979797	979797	979797	979797
3	1	1	104	28	2		1	25mgx2x3								3					1.50x18	27									1	0	0	0	0	0	0	0	0		979797	979797	979797	979797	979797	979797	979797	979797	979797
3	1	1	104	28	2		2		500mlsx2x2							1	3x3.50	10.5													1	0	0	0	0	0	0	0	0		979797	979797	979797	979797	979797	979797	979797	979797	979797
3	1	1	104	28	2		4				500mgx2x3x3					1	3x3.50	10.5													1	0	0	0	0	0	0	0	0		979797	979797	979797	979797	979797	979797	979797	979797	979797
3	1	1	104	28	2		1	25mgx2x3								1	3x3.50	10.5													1	0	0	0	0	0	0	0	0		979797	979797	979797	979797	979797	979797	979797	979797	979797
3	1	1	105	18	1		6						500mgx2x3x3			1	3x3.50	10.5													1	0	0	0	0	0	0	0	0		979797	979797	979797	979797	979797	979797	979797	979797	979797
3	1	1	105	18	1		4				500mgx2x3x3					1	3x3.50	10.5													1	0	0	0	0	0	0	0	0		979797	979797	979797	979797	979797	979797	979797	979797	979797
3	1	1	105	18	1		1	25mgx2x3								1	3x3.50	10.5													1	0	0	0	0	0	0	0	0		979797	979797	979797	979797	979797	979797	979797	979797	979797
3	1	1	105	18	1		2		500mlsx2x2							1	3x3.50	10.5													1	0	0	0	0	0	0	0	0		979797	979797	979797	979797	979797	979797	979797	979797	979797
3	1	1	105	18	1		6						500mgx2x3x3			2			4x25	100											1	0	0	0	0	0	0	0	0		979797	979797	979797	979797	979797	979797	979797	979797	979797
3	1	1	105	18	1		4				500mgx2x3x3					2			4x25	100											1	0	0	0	0	0	0	0	0		979797	979797	979797	979797	979797	979797	979797	979797	979797
3	1	1	105	18	1		1	25mgx2x3								2			4x25	100											1	0	0	0	0	0	0	0	0		979797	979797	979797	979797	979797	979797	979797	979797	979797
3	1	1	105	18	1		2		500mlsx2x2							2			4x25	100											1	0	0	0	0	0	0	0	0		979797	979797	979797	979797	979797	979797	979797	979797	979797
3	1	1	105	18	1		6						500mgx2x3x3			6											2.25x18	40.5			1	0	0	0	0	0	0	0	0		979797	979797	979797	979797	979797	979797	979797	979797	979797
3	1	1	105	18	1		4				500mgx2x3x3					6											2.25x18	40.5			1	0	0	0	0	0	0	0	0		979797	979797	979797	979797	979797	979797	979797	979797	979797
3	1	1	105	18	1		1	25mgx2x3								6											2.25x18	40.5			1	0	0	0	0	0	0	0	0		979797	979797	979797	979797	979797	979797	979797	979797	979797
3	1	1	105	18	1		2		500mlsx2x2							6											2.25x18	40.5			1	0	0	0	0	0	0	0	0		979797	979797	979797	979797	979797	979797	979797	979797	979797
3	1	1	105	18	1		6						500mgx2x3x3			3					1.50x18	27									1	0	0	0	0	0	0	0	0		979797	979797	979797	979797	979797	979797	979797	979797	979797
3	1	1	105	18	1		4				500mgx2x3x3					3					1.50x18	27									1	0	0	0	0	0	0	0	0		979797	979797	979797	979797	979797	979797	979797	979797	979797
3	1	1	105	18	1		1	25mgx2x3								3					1.50x18	27									1	0	0	0	0	0	0	0	0		979797	979797	979797	979797	979797	979797	979797	979797	979797
3	1	1	105	18	1		2		500mlsx2x2							3					1.50x18	27									1	0	0	0	0	0	0	0	0		979797	979797	979797	979797	979797	979797	979797	979797	979797
3	1	1	106	51	2		4				500mgx2x3x3					1	3x3.50	10.5													1	0	0	0	0	0	0	0	0		979797	979797	979797	979797	979797	979797	979797	979797	979797
3	1	1	106	51	2		2		500mlsx2x2							1	3x3.50	10.5													1	0	0	0	0	0	0	0	0		979797	979797	979797	979797	979797	979797	979797	979797	979797
3	1	1	106	51	2		1	25mgx2x3								1	3x3.50	10.5													1	0	0	0	0	0	0	0	0		979797	979797	979797	979797	979797	979797	979797	979797	979797
3	1	1	106	51	2		4				500mgx2x3x3					3					1.50x18	27									1	0	0	0	0	0	0	0	0		979797	979797	979797	979797	979797	979797	979797	979797	979797
3	1	1	106	51	2		2		500mlsx2x2							3					1.50x18	27									1	0	0	0	0	0	0	0	0		979797	979797	979797	979797	979797	979797	979797	979797	979797
3	1	1	106	51	2		1	25mgx2x3								3					1.50x18	27									1	0	0	0	0	0	0	0	0		979797	979797	979797	979797	979797	979797	979797	979797	979797
3	1	1	106	51	2		4				500mgx2x3x3					2			4x25	100											1	0	0	0	0	0	0	0	0		979797	979797	979797	979797	979797	979797	979797	979797	979797
3	1	1	106	51	2		2		500mlsx2x2							2			4x25	100											1	0	0	0	0	0	0	0	0		979797	979797	979797	979797	979797	979797	979797	979797	979797
3	1	1	106	51	2		1	25mgx2x3								2			4x25	100											1	0	0	0	0	0	0	0	0		979797	979797	979797	979797	979797	979797	979797	979797	979797
3	1	1	107	51	2		1	25mgx2x3								2			4x25	100											1	0	0	0	0	0	0	0	0		979797	979797	979797	979797	979797	979797	979797	979797	979797
3	1	1	107	51	2		2		500mlsx2x2							2			4x25	100											1	0	0	0	0	0	0	0	0		979797	979797	979797	979797	979797	979797	979797	979797	979797
3	1	1	107	51	2		4				500mgx2x3x3					2			4x25	100											1	0	0	0	0	0	0	0	0		979797	979797	979797	979797	979797	979797	979797	979797	979797
3	1	1	107	51	2		1	25mgx2x3								3					1.50x18	27									1	0	0	0	0	0	0	0	0		979797	979797	979797	979797	979797	979797	979797	979797	979797
3	1	1	107	51	2		2		500mlsx2x2							3					1.50x18	27									1	0	0	0	0	0	0	0	0		979797	979797	979797	979797	979797	979797	979797	979797	979797
3	1	1	107	51	2		4				500mgx2x3x3					3					1.50x18	27									1	0	0	0	0	0	0	0	0		979797	979797	979797	979797	979797	979797	979797	979797	979797
3	1	1	107	51	2		1	25mgx2x3								1	3x3.50	10.5													1	0	0	0	0	0	0	0	0		979797	979797	979797	979797	979797	979797	979797	979797	979797
3	1	1	107	51	2		2		500mlsx2x2							1	3x3.50	10.5													1	0	0	0	0	0	0	0	0		979797	979797	979797	979797	979797	979797	979797	979797	979797
3	1	1	107	51	2		4				500mgx2x3x3					1	3x3.50	10.5													1	0	0	0	0	0	0	0	0		979797	979797	979797	979797	979797	979797	979797	979797	979797
3	1	1	108	40	1		1	25mgx2x3								6											2.25x18	40.5			1	0	0	0	0	0	0	0	0		979797	979797	979797	979797	979797	979797	979797	979797	979797
3	1	1	108	40	1		4				500mgx2x3x3					6											2.25x18	40.5			1	0	0	0	0	0	0	0	0		979797	979797	979797	979797	979797	979797	979797	979797	979797
3	1	1	108	40	1		6						500mgx2x3x3			6											2.25x18	40.5			1	0	0	0	0	0	0	0	0		979797	979797	979797	979797	979797	979797	979797	979797	979797
3	1	1	108	40	1		1	25mgx2x3								1	3x3.50	10.5													1	0	0	0	0	0	0	0	0		979797	979797	979797	979797	979797	979797	979797	979797	979797
3	1	1	108	40	1		4				500mgx2x3x3					1	3x3.50	10.5													1	0	0	0	0	0	0	0	0		979797	979797	979797	979797	979797	979797	979797	979797	979797
3	1	1	108	40	1		6						500mgx2x3x3			1	3x3.50	10.5													1	0	0	0	0	0	0	0	0		979797	979797	979797	979797	979797	979797	979797	979797	979797
3	1	1	108	40	1		1	25mgx2x3								3					1.50x18	27									1	0	0	0	0	0	0	0	0		979797	979797	979797	979797	979797	979797	979797	979797	979797
3	1	1	108	40	1		4				500mgx2x3x3					3					1.50x18	27									1	0	0	0	0	0	0	0	0		979797	979797	979797	979797	979797	979797	979797	979797	979797
3	1	1	108	40	1		6						500mgx2x3x3			3					1.50x18	27									1	0	0	0	0	0	0	0	0		979797	979797	979797	979797	979797	979797	979797	979797	979797
3	1	1	109	4	1		2		500mlsx2x2							1	3x3.50	10.5													1	0	0	0	0	0	0	0	0		979797	979797	979797	979797	979797	979797	979797	979797	979797
3	1	1	109	4	1		1	25mgx2x3								1	3x3.50	10.5													1	0	0	0	0	0	0	0	0		979797	979797	979797	979797	979797	979797	979797	979797	979797
3	1	1	109	4	1		5					250mlsx1x2				1	3x3.50	10.5													1	0	0	0	0	0	0	0	0		979797	979797	979797	979797	979797	979797	979797	979797	979797
3	1	1	109	4	1		2		500mlsx2x2							2			4x25	100											1	0	0	0	0	0	0	0	0		979797	979797	979797	979797	979797	979797	979797	979797	979797
3	1	1	109	4	1		1	25mgx2x3								2			4x25	100											1	0	0	0	0	0	0	0	0		979797	979797	979797	979797	979797	979797	979797	979797	979797
3	1	1	109	4	1		5					250mlsx1x2				2			4x25	100											1	0	0	0	0	0	0	0	0		979797	979797	979797	979797	979797	979797	979797	979797	979797
3	1	1	109	4	1		2		500mlsx2x2							5									1x36	36					1	0	0	0	0	0	0	0	0		979797	979797	979797	979797	979797	979797	979797	979797	979797
3	1	1	109	4	1		1	25mgx2x3								5									1x36	36					1	0	0	0	0	0	0	0	0		979797	979797	979797	979797	979797	979797	979797	979797	979797
3	1	1	109	4	1		5					250mlsx1x2				5									1x36	36					1	0	0	0	0	0	0	0	0		979797	979797	979797	979797	979797	979797	979797	979797	979797
3	1	1	110	40	1		4				500mgx2x3x3					1	3x3.50	10.5													1	0	0	0	0	0	0	0	0		979797	979797	979797	979797	979797	979797	979797	979797	979797
3	1	1	110	40	1		2		500mlsx2x2							1	3x3.50	10.5													1	0	0	0	0	0	0	0	0		979797	979797	979797	979797	979797	979797	979797	979797	979797
3	1	1	110	40	1		1	25mgx2x3								1	3x3.50	10.5													1	0	0	0	0	0	0	0	0		979797	979797	979797	979797	979797	979797	979797	979797	979797
3	1	1	110	40	1		4				500mgx2x3x3					3					1.50x18	27									1	0	0	0	0	0	0	0	0		979797	979797	979797	979797	979797	979797	979797	979797	979797
3	1	1	110	40	1		2		500mlsx2x2							3					1.50x18	27									1	0	0	0	0	0	0	0	0		979797	979797	979797	979797	979797	979797	979797	979797	979797
3	1	1	110	40	1		1	25mgx2x3								3					1.50x18	27									1	0	0	0	0	0	0	0	0		979797	979797	979797	979797	979797	979797	979797	979797	979797
3	1	1	110	40	1		4				500mgx2x3x3					2			4x25	100											1	0	0	0	0	0	0	0	0		979797	979797	979797	979797	979797	979797	979797	979797	979797
3	1	1	110	40	1		2		500mlsx2x2							2			4x25	100											1	0	0	0	0	0	0	0	0		979797	979797	979797	979797	979797	979797	979797	979797	979797
3	1	1	110	40	1		1	25mgx2x3								2			4x25	100											1	0	0	0	0	0	0	0	0		979797	979797	979797	979797	979797	979797	979797	979797	979797
3	1	1	111	23	2		4				500mgx2x3x3					2			4x25	100									0	0	1	0	0	0	0	0	0	0	0		979797	979797	979797	979797	979797	979797	979797	979797	979797
3	1	1	111	23	2		2		500mlsx2x2							2			4x25	100									0	0	1	0	0	0	0	0	0	0	0		979797	979797	979797	979797	979797	979797	979797	979797	979797
3	1	1	111	23	2		1	25mgx2x3								2			4x25	100									0	0	1	0	0	0	0	0	0	0	0		979797	979797	979797	979797	979797	979797	979797	979797	979797
3	1	1	111	23	2		4				500mgx2x3x3					1	3x3.50	10.5											0	0	1	0	0	0	0	0	0	0	0		979797	979797	979797	979797	979797	979797	979797	979797	979797
3	1	1	111	23	2		2		500mlsx2x2							1	3x3.50	10.5											0	0	1	0	0	0	0	0	0	0	0		979797	979797	979797	979797	979797	979797	979797	979797	979797
3	1	1	111	23	2		1	25mgx2x3								1	3x3.50	10.5											0	0	1	0	0	0	0	0	0	0	0		979797	979797	979797	979797	979797	979797	979797	979797	979797
3	1	1	111	23	2		4				500mgx2x3x3					3					1.50x18	27							0	0	1	0	0	0	0	0	0	0	0		979797	979797	979797	979797	979797	979797	979797	979797	979797
3	1	1	111	23	2		2		500mlsx2x2							3					1.50x18	27							0	0	1	0	0	0	0	0	0	0	0		979797	979797	979797	979797	979797	979797	979797	979797	979797
3	1	1	111	23	2		1	25mgx2x3								3					1.50x18	27							0	0	1	0	0	0	0	0	0	0	0		979797	979797	979797	979797	979797	979797	979797	979797	979797
3	1	1	112	19	1		6						500mgx2x3x3			6											2.25x18	40.5			1	0	0	0	0	0	0	0	0		979797	979797	979797	979797	979797	979797	979797	979797	979797
3	1	1	112	19	1		1	25mgx2x3								6											2.25x18	40.5			1	0	0	0	0	0	0	0	0		979797	979797	979797	979797	979797	979797	979797	979797	979797
3	1	1	112	19	1		4				500mgx2x3x3					6											2.25x18	40.5			1	0	0	0	0	0	0	0	0		979797	979797	979797	979797	979797	979797	979797	979797	979797
3	1	1	112	19	1		6						500mgx2x3x3			1	3x3.50	10.5													1	0	0	0	0	0	0	0	0		979797	979797	979797	979797	979797	979797	979797	979797	979797
3	1	1	112	19	1		1	25mgx2x3								1	3x3.50	10.5													1	0	0	0	0	0	0	0	0		979797	979797	979797	979797	979797	979797	979797	979797	979797
3	1	1	112	19	1		4				500mgx2x3x3					1	3x3.50	10.5													1	0	0	0	0	0	0	0	0		979797	979797	979797	979797	979797	979797	979797	979797	979797
3	1	1	112	19	1		6						500mgx2x3x3			3					1.50x18	27									1	0	0	0	0	0	0	0	0		979797	979797	979797	979797	979797	979797	979797	979797	979797
3	1	1	112	19	1		1	25mgx2x3								3					1.50x18	27									1	0	0	0	0	0	0	0	0		979797	979797	979797	979797	979797	979797	979797	979797	979797
3	1	1	112	19	1		4				500mgx2x3x3					3					1.50x18	27									1	0	0	0	0	0	0	0	0		979797	979797	979797	979797	979797	979797	979797	979797	979797
3	1	1	113	10	1		4				500mgx2x3x3					3					1.50x18	27									1	0	0	0	0	0	0	0	0		979797	979797	979797	979797	979797	979797	979797	979797	979797
3	1	1	113	10	1		2		500mlsx2x2							3					1.50x18	27									1	0	0	0	0	0	0	0	0		979797	979797	979797	979797	979797	979797	979797	979797	979797
3	1	1	113	10	1		1	25mgx2x3								3					1.50x18	27									1	0	0	0	0	0	0	0	0		979797	979797	979797	979797	979797	979797	979797	979797	979797
3	1	1	113	10	1		4				500mgx2x3x3					1	3x3.50	10.5													1	0	0	0	0	0	0	0	0		979797	979797	979797	979797	979797	979797	979797	979797	979797
3	1	1	113	10	1		2		500mlsx2x2							1	3x3.50	10.5													1	0	0	0	0	0	0	0	0		979797	979797	979797	979797	979797	979797	979797	979797	979797
3	1	1	113	10	1		1	25mgx2x3								1	3x3.50	10.5													1	0	0	0	0	0	0	0	0		979797	979797	979797	979797	979797	979797	979797	979797	979797
3	1	1	113	10	1		4				500mgx2x3x3					2			4x25	100											1	0	0	0	0	0	0	0	0		979797	979797	979797	979797	979797	979797	979797	979797	979797
3	1	1	113	10	1		2		500mlsx2x2							2			4x25	100											1	0	0	0	0	0	0	0	0		979797	979797	979797	979797	979797	979797	979797	979797	979797
3	1	1	113	10	1		1	25mgx2x3								2			4x25	100											1	0	0	0	0	0	0	0	0		979797	979797	979797	979797	979797	979797	979797	979797	979797
3	1	1	114	16	2		4				500mgx2x3x3					2			4x25	100											1	0	0	0	0	0	0	0	0		979797	979797	979797	979797	979797	979797	979797	979797	979797
3	1	1	114	16	2		1	25mgx2x3								2			4x25	100											1	0	0	0	0	0	0	0	0		979797	979797	979797	979797	979797	979797	979797	979797	979797
3	1	1	114	16	2		2		500mlsx2x2							2			4x25	100											1	0	0	0	0	0	0	0	0		979797	979797	979797	979797	979797	979797	979797	979797	979797
3	1	1	114	16	2		4				500mgx2x3x3					1	3x3.50	10.5													1	0	0	0	0	0	0	0	0		979797	979797	979797	979797	979797	979797	979797	979797	979797
3	1	1	114	16	2		1	25mgx2x3								1	3x3.50	10.5													1	0	0	0	0	0	0	0	0		979797	979797	979797	979797	979797	979797	979797	979797	979797
3	1	1	114	16	2		2		500mlsx2x2							1	3x3.50	10.5													1	0	0	0	0	0	0	0	0		979797	979797	979797	979797	979797	979797	979797	979797	979797
3	1	1	114	16	2		4				500mgx2x3x3					3					1.50x18	27									1	0	0	0	0	0	0	0	0		979797	979797	979797	979797	979797	979797	979797	979797	979797
3	1	1	114	16	2		1	25mgx2x3								3					1.50x18	27									1	0	0	0	0	0	0	0	0		979797	979797	979797	979797	979797	979797	979797	979797	979797
3	1	1	114	16	2		2		500mlsx2x2							3					1.50x18	27									1	0	0	0	0	0	0	0	0		979797	979797	979797	979797	979797	979797	979797	979797	979797
3	1	1	115	22	1		2		500mlsx2x2							3					1.50x18	27									1	0	0	0	0	0	0	0	0		979797	979797	979797	979797	979797	979797	979797	979797	979797
3	1	1	115	22	1		4				500mgx2x3x3					3					1.50x18	27									1	0	0	0	0	0	0	0	0		979797	979797	979797	979797	979797	979797	979797	979797	979797
3	1	1	115	22	1		6						500mgx2x3x3			3					1.50x18	27									1	0	0	0	0	0	0	0	0		979797	979797	979797	979797	979797	979797	979797	979797	979797
3	1	1	115	22	1		1	25mgx2x3								3					1.50x18	27									1	0	0	0	0	0	0	0	0		979797	979797	979797	979797	979797	979797	979797	979797	979797
3	1	1	115	22	1		2		500mlsx2x2							2			4x25	100											1	0	0	0	0	0	0	0	0		979797	979797	979797	979797	979797	979797	979797	979797	979797
3	1	1	115	22	1		4				500mgx2x3x3					2			4x25	100											1	0	0	0	0	0	0	0	0		979797	979797	979797	979797	979797	979797	979797	979797	979797
3	1	1	115	22	1		6						500mgx2x3x3			2			4x25	100											1	0	0	0	0	0	0	0	0		979797	979797	979797	979797	979797	979797	979797	979797	979797
3	1	1	115	22	1		1	25mgx2x3								2			4x25	100											1	0	0	0	0	0	0	0	0		979797	979797	979797	979797	979797	979797	979797	979797	979797
3	1	1	115	22	1		2		500mlsx2x2							1	3x3.50	10.5													1	0	0	0	0	0	0	0	0		979797	979797	979797	979797	979797	979797	979797	979797	979797
3	1	1	115	22	1		4				500mgx2x3x3					1	3x3.50	10.5													1	0	0	0	0	0	0	0	0		979797	979797	979797	979797	979797	979797	979797	979797	979797
3	1	1	115	22	1		6						500mgx2x3x3			1	3x3.50	10.5													1	0	0	0	0	0	0	0	0		979797	979797	979797	979797	979797	979797	979797	979797	979797
3	1	1	115	22	1		1	25mgx2x3								1	3x3.50	10.5													1	0	0	0	0	0	0	0	0		979797	979797	979797	979797	979797	979797	979797	979797	979797
3	1	1	212	30	1		1	0																							1	0	0	0	0	0	0	0	0		1	979797	979797	979797	979797	979797	979797	979797	979797
3	1	1	212	30	1		2		0																						1	0	0	0	0	0	0	0	0		1	979797	979797	979797	979797	979797	979797	979797	979797
3	1	1	212	30	1		2		500mlsx1x2																						1	0	0	0	0	0	0	0	0		1	979797	979797	979797	979797	979797	979797	979797	979797
3	1	1	212	30	1		4				0																				1	0	0	0	0	0	0	0	0		1	979797	979797	979797	979797	979797	979797	979797	979797
3	1	1	212	30	1		1	25mgx2x2																							1	0	0	0	0	0	0	0	0		1	979797	979797	979797	979797	979797	979797	979797	979797
3	1	1	212	30	1		4				500mgx2x2																				1	0	0	0	0	0	0	0	0		1	979797	979797	979797	979797	979797	979797	979797	979797
3	1	1	214	7	2		2		500mlsx1x1x1							1	1x25mg	3.5													1	0	0	0	0	0	0	0	0		1	979797	979797	979797	979797	979797	979797	979797	979797
3	1	1	214	7	2		4				500mgx1x1					1	1x25mg	3.5													1	0	0	0	0	0	0	0	0		1	979797	979797	979797	979797	979797	979797	979797	979797
3	1	1	214	7	2		1	25mgx1x1								1	1x25mg	3.5													1	0	0	0	0	0	0	0	0		1	979797	979797	979797	979797	979797	979797	979797	979797
3	1	1	214	7	2		2		500mlsx1x1x1							3					1 x 500mg	15									1	0	0	0	0	0	0	0	0		1	979797	979797	979797	979797	979797	979797	979797	979797
3	1	1	214	7	2		4				500mgx1x1					3					1 x 500mg	15									1	0	0	0	0	0	0	0	0		1	979797	979797	979797	979797	979797	979797	979797	979797
3	1	1	214	7	2		1	25mgx1x1								3					1 x 500mg	15									1	0	0	0	0	0	0	0	0		1	979797	979797	979797	979797	979797	979797	979797	979797
3	1	1	214	7	2		2		500mlsx1x1x1							2			1x500mls	25											1	0	0	0	0	0	0	0	0		1	979797	979797	979797	979797	979797	979797	979797	979797
3	1	1	214	7	2		4				500mgx1x1					2			1x500mls	25											1	0	0	0	0	0	0	0	0		1	979797	979797	979797	979797	979797	979797	979797	979797
3	1	1	214	7	2		1	25mgx1x1								2			1x500mls	25											1	0	0	0	0	0	0	0	0		1	979797	979797	979797	979797	979797	979797	979797	979797
3	1	1	215	12	1		4				500mgx1x1 x1					1	1x25mg	3.5													1	0	0	0	0	0	0	0	0		1	979797	979797	979797	979797	979797	979797	979797	979797
3	1	1	215	12	1		1	25mgx1x1								1	1x25mg	3.5													1	0	0	0	0	0	0	0	0		1	979797	979797	979797	979797	979797	979797	979797	979797
3	1	1	215	12	1		4				500mgx1x1 x1					3					1 x 500mg	15									1	0	0	0	0	0	0	0	0		1	979797	979797	979797	979797	979797	979797	979797	979797
3	1	1	215	12	1		1	25mgx1x1								3					1 x 500mg	15									1	0	0	0	0	0	0	0	0		1	979797	979797	979797	979797	979797	979797	979797	979797
3	1	1	216	2	2		5					250mgx1x1				5									1x20	20					1	0	0	0	0	0	0	0	0		1	979797	979797	979797	979797	979797	979797	979797	979797
3	1	1	216	2	2		2		500mlsx1x2							5									1x20	20					1	0	0	0	0	0	0	0	0		1	979797	979797	979797	979797	979797	979797	979797	979797
3	1	1	216	2	2		5					250mgx1x1				2			2x500mls	50											1	0	0	0	0	0	0	0	0		1	979797	979797	979797	979797	979797	979797	979797	979797
3	1	1	216	2	2		2		500mlsx1x2							2			2x500mls	50											1	0	0	0	0	0	0	0	0		1	979797	979797	979797	979797	979797	979797	979797	979797
3	1	1	217	30	2		4				500mgx1x1					1	2x500mg x2x2	7													1	0	0	0	0	0	0	0	0		1	979797	979797	979797	979797	979797	979797	979797	979797
3	1	1	217	30	2		2		500mlsx1x1							1	2x500mg x2x2	7													1	0	0	0	0	0	0	0	0		1	979797	979797	979797	979797	979797	979797	979797	979797
3	1	1	217	30	2		1	25mgx2x2								1	2x500mg x2x2	7													1	0	0	0	0	0	0	0	0		1	979797	979797	979797	979797	979797	979797	979797	979797
3	1	1	217	30	2		4				500mgx1x1					2			1x500mls	25											1	0	0	0	0	0	0	0	0		1	979797	979797	979797	979797	979797	979797	979797	979797
3	1	1	217	30	2		2		500mlsx1x1							2			1x500mls	25											1	0	0	0	0	0	0	0	0		1	979797	979797	979797	979797	979797	979797	979797	979797
3	1	1	217	30	2		1	25mgx2x2								2			1x500mls	25											1	0	0	0	0	0	0	0	0		1	979797	979797	979797	979797	979797	979797	979797	979797
3	1	1	217	30	2		4				500mgx1x1					3					1 x 500mg	15									1	0	0	0	0	0	0	0	0		1	979797	979797	979797	979797	979797	979797	979797	979797
3	1	1	217	30	2		2		500mlsx1x1							3					1 x 500mg	15									1	0	0	0	0	0	0	0	0		1	979797	979797	979797	979797	979797	979797	979797	979797
3	1	1	217	30	2		1	25mgx2x2								3					1 x 500mg	15									1	0	0	0	0	0	0	0	0		1	979797	979797	979797	979797	979797	979797	979797	979797
3	1	1	218	46	2		2		500mlsx1x1							3					500mgx1x1	15									1	0	0	0	0	0	0	0	0		1	979797	979797	979797	979797	979797	979797	979797
3	1	1	218	46	2		1	25mg x2x2								3					500mgx1x1	15									1	0	0	0	0	0	0	0	0		1	979797	979797	979797	979797	979797	979797	979797
3	1	1	218	46	2		4				500mgx1x1					3					500mgx1x1	15									1	0	0	0	0	0	0	0	0		1	979797	979797	979797	979797	979797	979797	979797
3	1	1	218	46	2		2		500mlsx1x1							2			1x500mls	25											1	0	0	0	0	0	0	0	0		1	979797	979797	979797	979797	979797	979797	979797
3	1	1	218	46	2		1	25mg x2x2								2			1x500mls	25											1	0	0	0	0	0	0	0	0		1	979797	979797	979797	979797	979797	979797	979797
3	1	1	218	46	2		4				500mgx1x1					2			1x500mls	25											1	0	0	0	0	0	0	0	0		1	979797	979797	979797	979797	979797	979797	979797
3	1	1	218	46	2		2		500mlsx1x1							1	2x500mg	7													1	0	0	0	0	0	0	0	0		1	979797	979797	979797	979797	979797	979797	979797
3	1	1	218	46	2		1	25mg x2x2								1	2x500mg	7													1	0	0	0	0	0	0	0	0		1	979797	979797	979797	979797	979797	979797	979797
3	1	1	218	46	2		4				500mgx1x1					1	2x500mg	7													1	0	0	0	0	0	0	0	0		1	979797	979797	979797	979797	979797	979797	979797
3	1	1	219	35	2		2									1															1	1									979797	979797	979797	979797	979797	979797	979797	979797	979797
3	1	1	219	35	2		1									1															1	1									979797	979797	979797	979797	979797	979797	979797	979797	979797
3	1	1	219	35	2		4				500mgx1x1					1															1	1									979797	979797	979797	979797	979797	979797	979797	979797	979797
3	1	1	219	35	2		2									3															1	1									979797	979797	979797	979797	979797	979797	979797	979797	979797
3	1	1	219	35	2		1									3															1	1									979797	979797	979797	979797	979797	979797	979797	979797	979797
3	1	1	219	35	2		4				500mgx1x1					3															1	1									979797	979797	979797	979797	979797	979797	979797	979797	979797
3	1	1	219	35	2		2									2			1×25	25											1	1									979797	979797	979797	979797	979797	979797	979797	979797	979797
3	1	1	219	35	2		1									2			1×25	25											1	1									979797	979797	979797	979797	979797	979797	979797	979797	979797
3	1	1	219	35	2		4				500mgx1x1					2			1×25	25											1	1									979797	979797	979797	979797	979797	979797	979797	979797	979797
[truncated: 3 more columns]

## Sheet: facility cholera survey
A2	A3	A5_	B2	C1	C2	c3	C4	C5	GROUP_D1A_D1_1A	GROUP_D1A_D1_2A	GROUP_D1A_D1_3A	GROUP_D1A_D1_4A	GROUP_D1A_D1_5A	GROUP_D1A_D1_6A	GROUP_D1A_D1_7A	GROUP_D1A_D1_8A	D1_9A	D1_10A	GROUP_D1B_D1_1B	GROUP_D1B_D1_2B	GROUP_D1B_D1_3B	GROUP_D1B_D1_4B	GROUP_D1B_D1_5B	GROUP_D1B_D1_6B	GROUP_D1B_D1_7B	GROUP_D1B_D1_8B	D1_9B	D1_10B	GROUP_D1C_D1_1C	GROUP_D1C_D1_2C	GROUP_D1C_D1_3C	GROUP_D1C_D1_4C	GROUP_D1C_D1_5C	GROUP_D1C_D1_6C	GROUP_D1C_D1_7C	GROUP_D1C_D1_8C	D1_9C	D1_10C	GROUP_D1D_D1_1D	GROUP_D1D_D1_2D	GROUP_D1D_D1_3D	GROUP_D1D_D1_4D	GROUP_D1D_D1_5D	GROUP_D1D_D1_6D	GROUP_D1D_D1_7D	GROUP_D1D_D1_8D	D1_9D	D1_10B	D5
3	1	1	1	1	110	93	0	0	2	2	2	2	2	2	2	2			36	0	36	36	24	24	36	36			0	0	0	0	0	0	0	0			0	0	0	0	0	0	0	0			2
1	1	1	1	1	441	249	33	0	2	2	2	2	2	2	2	2			36	0	36	36	24	24	36	36			48	0	48	48	32	32	48	48			48	0	48	48	32	32	48	32			2
2	1	1	1	1	1250	700	0	0											108	0	108	108	72	72	108	108																							2
[truncated: 41 more columns]

## Sheet: Sheet3
Costs of Vaccination			Costs of Vaccination			Costs of Vaccination				Costs of Vaccination			Costs of Vaccination			Costs of Vaccination
Total Cost	729452		Total Cost	729452		Total Cost	729452			Total Cost	729452		Total Cost	729452		Total Cost	729452
Cost Averted	30418.8		Cost Averted	31006.6		Cost Averted	37850.3			Cost Averted	40973.2		Cost Averted	41764.9		Cost Averted	50983.2
Net Cost	699033		Net Cost	698445		Net Cost	691602			Net Cost	688479		Net Cost	687687		Net Cost	678469
Non-Fatal Cases Averted	2059.41		Non-Fatal Cases Averted	2059.41		Non-Fatal Cases Averted	2059.41			Non-Fatal Cases Averted	2773.96		Non-Fatal Cases Averted	2773.96		Non-Fatal Cases Averted	2773.96
Deaths Averted	39.8866		Deaths Averted	39.8866		Deaths Averted	39.8866			Deaths Averted	53.726		Deaths Averted	53.726		Deaths Averted	53.726
Total Cases Averted	2099.3		Total Cases Averted	2099.3		Total Cases Averted	2099.3			Total Cases Averted	2827.69		Total Cases Averted	2827.69		Total Cases Averted	2827.69
DALYs Averted	905.621		DALYs Averted	905.621		DALYs Averted	905.621			DALYs Averted	1219.84		DALYs Averted	1219.84		DALYs Averted	1219.84
Cost per Case Averted	332.985		Cost per Case Averted	332.705		Cost per Case Averted	329.445			Cost per Case Averted	243.478		Cost per Case Averted	243.198		Cost per Case Averted	239.938
Cost per Life Saved	17525.5		Cost per Life Saved	17510.8		Cost per Life Saved	17339.2			Cost per Life Saved	12814.6		Cost per Life Saved	12799.9		Cost per Life Saved	12628.3
Total Cost per DALY Averted	771.883		Total Cost per DALY Averted	771.234		Total Cost per DALY Averted	763.677			Total Cost per DALY Averted	564.399		Total Cost per DALY Averted	563.75		Total Cost per DALY Averted	556.193
Vaccine Dose Requirements			Vaccine Dose Requirements			Vaccine Dose Requirements				Vaccine Dose Requirements			Vaccine Dose Requirements			Vaccine Dose Requirements
People vaccinated per death averted	10632.6		People vaccinated per death averted	10632.6		People vaccinated per death averted	10632.6			People vaccinated per death averted	7893.75		People vaccinated per death averted	7893.75		People vaccinated per death averted	7893.75
Doses required per death averted	10632.6		Doses required per death averted	10632.6		Doses required per death averted	10632.6			Doses required per death averted	7893.75		Doses required per death averted	7893.75		Doses required per death averted	7893.75
People vaccinated per case averted	202.02		People vaccinated per case averted	202.02		People vaccinated per case averted	202.02			People vaccinated per case averted	149.981		People vaccinated per case averted	149.981		People vaccinated per case averted	149.981
Doses required per case averted	202.02		Doses required per case averted	202.02		Doses required per case averted	202.02			Doses required per case averted	149.981		Doses required per case averted	149.981		Doses required per case averted	149.981
Cost-Effectiveness Thresholds			Cost-Effectiveness Thresholds			Cost-Effectiveness Thresholds				Cost-Effectiveness Thresholds			Cost-Effectiveness Thresholds			Cost-Effectiveness Thresholds
Total Vaccine Cost of Purchase & Delivery ($)			Total Vaccine Cost of Purchase & Delivery ($)			Total Vaccine Cost of Purchase & Delivery ($)				Total Vaccine Cost of Purchase & Delivery ($)			Total Vaccine Cost of Purchase & Delivery ($)			Total Vaccine Cost of Purchase & Delivery ($)
Cost Effective	9.681		Cost Effective	9.68239		Cost Effective	9.69853			Cost Effective	13.04		Cost Effective	13.0419		Cost Effective	13.0636
Very Cost Effective	3.27482		Very Cost Effective	3.2762		Very Cost Effective	3.29234			Very Cost Effective	4.41108		Very Cost Effective	4.41295		Very Cost Effective	4.43468
Vaccine Efficacy (%)			Vaccine Efficacy (%)			Vaccine Efficacy (%)				Vaccine Efficacy (%)			Vaccine Efficacy (%)			Vaccine Efficacy (%)
Cost Effective	0.117261		Cost Effective	0.117244		Cost Effective	0.117049			Cost Effective	0.117261		Cost Effective	0.117244		Cost Effective	0.117049
Very Cost Effective	0.346645		Very Cost Effective	0.346499		Very Cost Effective	0.3448			Very Cost Effective	0.346645		Very Cost Effective	0.346499		Very Cost Effective	0.3448
Incidence (per 1,000/year)			Incidence (per 1,000/year)			Incidence (per 1,000/year)				Incidence (per 1,000/year)			Incidence (per 1,000/year)			Incidence (per 1,000/year)
Cost Effective	0.444169		Cost Effective	0.444105		Cost Effective	0.443366			Cost Effective	0.329754		Cost Effective	0.329707		Cost Effective	0.329158
Very Cost Effective	1.31305		Very Cost Effective	1.31249		Very Cost Effective	1.30606			Very Cost Effective	0.974818		Very Cost Effective	0.974405		Very Cost Effective	0.96963
Case Fatality Ratio (%)			Case Fatality Ratio (%)			Case Fatality Ratio (%)				Case Fatality Ratio (%)			Case Fatality Ratio (%)			Case Fatality Ratio (%)
Cost Effective	0.0032		Cost Effective	0.00325632		Cost Effective	0.00322441			Cost Effective	0.00238302		Cost Effective	0.00238028		Cost Effective	0.00234837
Very Cost Effective	0.0098		Very Cost Effective	0.00976896		Very Cost Effective	0.00967324			Very Cost Effective	0.00714905		Very Cost Effective	0.00714083		Very Cost Effective	0.00704511
Costs of Vaccination			Costs of Vaccination							Costs of Vaccination			Costs of Vaccination
Total Cost	729452		Total Cost	729452						Total Cost	729452		Total Cost	729452
Cost Averted	37073.5		Cost Averted	73811.2						Cost Averted	49936.9		Cost Averted	99421.5
Net Cost	692378		Net Cost	655641						Net Cost	679515		Net Cost	630031
Non-Fatal Cases Averted	2059.41		Non-Fatal Cases Averted	2059.41						Non-Fatal Cases Averted	2773.96		Non-Fatal Cases Averted	2773.96
Deaths Averted	39.8866		Deaths Averted	39.8866						Deaths Averted	53.726		Deaths Averted	53.726
Total Cases Averted	2099.3		Total Cases Averted	2099.3						Total Cases Averted	2827.69		Total Cases Averted	2827.69
DALYs Averted	905.621		DALYs Averted	905.621						DALYs Averted	1219.84		DALYs Averted	1219.84
Cost per Case Averted	329.815		Cost per Case Averted	312.315						Cost per Case Averted	240.308		Cost per Case Averted	222.808
Cost per Life Saved	17358.7		Cost per Life Saved	16437.6						Cost per Life Saved	12647.8		Cost per Life Saved	11726.7
Total Cost per DALY Averted	764.534		Total Cost per DALY Averted	723.968						Total Cost per DALY Averted	557.051		Total Cost per DALY Averted	516.484
Limit for Cost-Effectiveness is 3 x GDP per DALY Averted			Limit for Cost-Effectiveness is 3 x GDP per DALY Averted							Limit for Cost-Effectiveness is 3 x GDP per DALY Averted			Limit for Cost-Effectiveness is 3 x GDP per DALY Averted
Vaccine Dose Requirements			Vaccine Dose Requirements							Vaccine Dose Requirements			Vaccine Dose Requirements
People vaccinated per death averted	10632.6		People vaccinated per death averted	10632.6						People vaccinated per death averted	7893.75		People vaccinated per death averted	7893.75
Doses required per death averted	10632.6		Doses required per death averted	10632.6						Doses required per death averted	7893.75		Doses required per death averted	7893.75
People vaccinated per case averted	202.02		People vaccinated per case averted	202.02						People vaccinated per case averted	149.981		People vaccinated per case averted	149.981
Doses required per case averted	202.02		Doses required per case averted	202.02						Doses required per case averted	149.981		Doses required per case averted	149.981
Cost-Effectiveness Thresholds			Cost-Effectiveness Thresholds							Cost-Effectiveness Thresholds			Cost-Effectiveness Thresholds
Total Vaccine Cost of Purchase & Delivery ($)			Total Vaccine Cost of Purchase & Delivery ($)							Total Vaccine Cost of Purchase & Delivery ($)			Total Vaccine Cost of Purchase & Delivery ($)
Cost Effective	9.69669		Cost Effective	9.78332						Cost Effective	13.0612		Cost Effective	13.1778
Very Cost Effective	3.29051		Very Cost Effective	3.37713						Very Cost Effective	4.43222		Very Cost Effective	4.5489
Vaccine Efficacy (%)			Vaccine Efficacy (%)							Vaccine Efficacy (%)			Vaccine Efficacy (%)
Cost Effective	0.117071		Cost Effective	0.116034						Cost Effective	0.117071		Cost Effective	0.116034
Very Cost Effective	0.344992		Very Cost Effective	0.336143						Very Cost Effective	0.344992		Very Cost Effective	0.336143
Incidence (per 1,000/year)			Incidence (per 1,000/year)							Incidence (per 1,000/year)			Incidence (per 1,000/year)
Cost Effective	0.44345		Cost Effective	0.439524						Cost Effective	0.329221		Cost Effective	0.326306
Very Cost Effective	1.30679		Very Cost Effective	1.27327						Very Cost Effective	0.970169		Very Cost Effective	0.945284
Case Fatality Ratio (%)			Case Fatality Ratio (%)							Case Fatality Ratio (%)			Case Fatality Ratio (%)
Cost Effective	0.00322803		Cost Effective	0.00305675						Cost Effective	0.00235199		Cost Effective	0.00218071
Very Cost Effective	0.0096841		Very Cost Effective	0.00917026						Very Cost Effective	0.00705598		Very Cost Effective	0.00654214

## Sheet: Sheet6
Table 7: Base-case estimates for cost-effectiveness of vaccination with single dose of ShancolTM
*Costs of Vaccination	ICER for Patients <12 at 89% Vaccine Efficacy		ICER for Patients <12 at 66% Vaccine Efficacy		ICER for Patients >12 at 89% Vaccine Efficacy		ICER for Patients >12 66% Vaccine Efficacy
Treatment cost	14.49	18.03	14.49	18.03	17.66	35.16	17.66	35.16
Total Cost	729452	729452	729452	729452	729452	729452	729452	729452
Cost Averted	40973.2	50983.2	30418.8	37850.3	73811.2	99533.3	37073.5	49993.1
Net Cost	688479	678469	699033	691602	655641	629919	692378	679459
Non-Fatal Cases Averted	2773.96	2773.96	2059.41	2059.41	2059.41	2777.08	2059.41	2777.08
Deaths Averted	53.726	53.726	39.8866	39.8866	39.8866	53.7865	39.8866	53.7865
Total Cases Averted	2827.69	2827.69	2099.3	2099.3	2099.3	2830.87	2099.3	2830.87
DALYs Averted	1219.84	1219.84	905.621	905.621	905.621	1221.22	905.621	1221.22
Cost per Case Averted	243.478	239.938	332.985	329.445	312.315	222.518	329.815	240.018
Cost per Life Saved	12814.6	12628.3	17525.5	17339.2	16437.6	11711.5	17358.7	12632.5
Total Cost per DALY Averted	564.399	556.193	771.883	763.677	723.968	515.813	764.534	556.379
* All costs in US$
Vaccine Dose Requirements
People vaccinated per death averted	10632.6	10632.6	10632.6	7884.88	7893.75	7893.75	10632.6	7884.88
Doses required per death averted	10632.6	10632.6	10632.6	7884.88	7893.75	7893.75	10632.6	7884.88
People vaccinated per case averted	202.02	202.02	202.02	149.813	149.981	149.981	202.02	149.813
Doses required per case averted	202.02	202.02	202.02	149.813	149.981	149.981	202.02	149.813
Cost-Effectiveness Thresholds
Total Vaccine Cost of Purchase & Delivery ($)
Cost Effective	9.681	9.69853	9.69669	13.0758	13.04	13.0636	9.78332	13.1927
Very Cost Effective	3.27482	3.29234	3.29051	4.4372	4.41108	4.43468	3.37713	4.55401
Vaccine Efficacy (%)
Cost Effective	0.117261	0.117049	0.117071	0.117071	0.117261	0.117049	0.116034	0.116034
Very Cost Effective	0.346645	0.3448	0.344992	0.344992	0.346645	0.3448	0.336143	0.336143
Incidence (per 1,000/year)
Cost Effective	0.444169	0.443366	0.44345	0.328851	0.329754	0.329158	0.439524	0.325939
Very Cost Effective	1.31305	1.30606	1.30679	0.969079	0.974818	0.96963	1.27327	0.944222
Case Fatality Ratio (%)
Cost Effective	0.325906	0.322441	0.322803	0.234916	0.238302	0.234837	0.305675	0.217788
Very Cost Effective	0.977718	0.967324	0.96841	0.704747	0.714905	0.704511	0.917026	0.653363
9	8	7	6	5	4	3	2	1
								Table 8: Base-case estimates for cost-effectiveness of vaccination with single dose of ShancolTM
	ICER for Patients >12 at 89% Vaccine Efficacy		ICER for Patients >12 at 89% Vaccine Efficacy		ICER for Patients >12 66% Vaccine Efficacy		ICER for Patients <12 at 66% Vaccine Efficacy	*Costs of Vaccination
35.16	17.66	18.03	14.49	35.16	17.66	18.03	14.49	Treatment cost
729452	729452	729452	729452	729452	729452	729452	729452	Total Cost
99533.3	73811.2	50983.2	40973.2	49993.1	37073.5	37850.3	30418.8	Cost Averted
629919	655641	678469	688479	679459	692378	691602	699033	Net Cost
2777.08	2059.41	2773.96	2773.96	2777.08	2059.41	2059.41	2059.41	Non-Fatal Cases Averted
53.7865	39.8866	53.726	53.726	53.7865	39.8866	39.8866	39.8866	Deaths Averted
2830.87	2099.3	2827.69	2827.69	2830.87	2099.3	2099.3	2099.3	Total Cases Averted
1221.22	905.621	1219.84	1219.84	1221.22	905.621	905.621	905.621	DALYs Averted
222.518	312.315	239.938	243.478	240.018	329.815	329.445	332.985	Cost per Case Averted
11711.5	16437.6	12628.3	12814.6	12632.5	17358.7	17339.2	17525.5	Cost per Life Saved
515.813	723.968	556.193	564.399	556.379	764.534	763.677	771.883	Total Cost per DALY Averted
								* All costs in US$
	Table 8: Base-case estimates for cost-effectiveness of vaccination with single dose of ShancolTM	ICER for Patients >12 66% Vaccine Efficacy	35.16	729 452	49993.1	679459	2777.08	53.7865	2830.87	1221.22	240.018	12632.5	556.379
			17.66	729 452	37073.5	692378	2059.41	39.8866	2099.3	905.621	329.815	17358.7	764.534
		ICER for Patients <12 at 66% Vaccine Efficacy	18.03	729 452	37850.3	691602	2059.41	39.8866	2099.3	905.621	329.445	17339.2	763.677
			14.49	729 452	30418.8	699033	2059.41	39.8866	2099.3	905.621	332.985	17525.5	771.883
		ICER for Patients >12 at 89% Vaccine Efficacy	35.16	729 452	99533.3	629919	2777.08	53.7865	2830.87	1221.22	222.518	11711.5	515.813
			17.66	729 452	73811.2	655641	2059.41	39.8866	2099.3	905.621	312.315	16437.6	723.968
		ICER for Patients >12 at 89% Vaccine Efficacy	18.03	729 452	50983.2	678469	2773.96	53.726	2827.69	1219.84	239.938	12628.3	556.193
			14.49	729 452	40973.2	688479	2773.96	53.726	2827.69	1219.84	243.478	12814.6	564.399
		*Costs of Vaccination	Treatment cost	Total Cost	Cost Averted	Net Cost	Non-Fatal Cases Averted	Deaths Averted	Total Cases Averted	DALYs Averted	Cost per Case Averted	Cost per Life Saved	Total Cost per DALY Averted	* All costs in US$
